# Supplementary material for: t-BuOK-mediated reductive addition of P(O)–H compounds to terminal alkynes forming β-arylphosphine oxides
Source: Royal Society of Chemistry journal article supplement (doi:10.1039/c7ob01104k), 2017-01-01

## Supporting Information

### *t*-BuOK-Mediated Reductive Addition of P(O)-H Compounds to Alkynes Forming $\beta$ -Arylphosphine oxides

Ji-Shu Zhang,<sup>a</sup> Jian-Qiu Zhang,<sup>a</sup> Tieqiao Chen,<sup>\*a</sup> and Li-Biao Han<sup>\*b</sup>

<sup>a</sup> State Key Laboratory of Chemo/Biosensing and Chemo metrics, College of Chemistry and Chemical Engineering, Hunan University, Changsha 410082, China

<sup>b</sup> National Institute of Advanced Industrial Science and Technology (AIST), Tsukuba, Ibaraki 305-8565, Japan

E-Mail: [chentieqiao@hnu.edu.cn](mailto:chentieqiao@hnu.edu.cn); [libiao-han@aist.go.jp](mailto:libiao-han@aist.go.jp)

#### EXPERIMENTAL SECTION

**General information:** All reactions were carried out in oven-dried Schlenk tubes under N<sub>2</sub> atmosphere. Solvents were treated by the standard procedure. Reagents were used as received unless otherwise noted. The pure products were obtained by means of column chromatography on silica (petroleum ether and ethyl acetate were used as the gradient eluting solvents). <sup>1</sup>H NMR, <sup>13</sup>C NMR and <sup>31</sup>P NMR data were acquired on a 400 MHz spectrometer (400 MHz for <sup>1</sup>H, 100.6 MHz for <sup>13</sup>C, and 162 MHz for <sup>31</sup>P NMR spectroscopy). Chemical shifts for <sup>1</sup>H NMR are referred to internal Me<sub>4</sub>Si (0 ppm) and reported as follows: chemical shift ( $\delta$  ppm), multiplicity, coupling constant (Hz) and integration. Data for <sup>31</sup>P NMR were referred to H<sub>3</sub>PO<sub>4</sub> (85% solution in D<sub>2</sub>O, 0 ppm). The ionization method of the high-resolution mass spectrum (HRMS) is Electron Impact (EI). The type of the mass analyzer is quadrupole.

#### General procedure for the *t*-BuOK-Mediated Reductive Addition of P(O)-H Compounds to Alkynes.

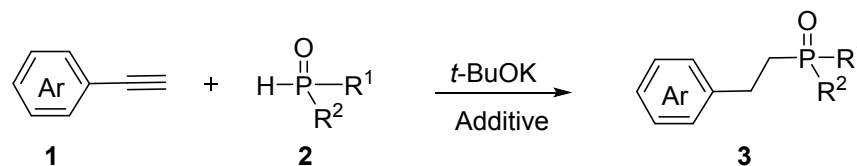

Under N<sub>2</sub> atmosphere, 1.7 mmol P(O)-H compounds, 1 mmol alkynes, 1 mmol KCl, 2 mmol isopropyl alcohol (IA), 0.2 mmol *t*-BuOK and 4.0 mL dioxane were charged into a 25 mL schlenk tube, then the mixture was stirred at 80 °C for 16 h. After removal of the volatiles, the residues were passed through a short silica chromatography column (particle size 37–54  $\mu\text{m}$ , petroleum ether/ethyl acetate as the eluent) to afford analytically pure products **3**.

### Synthesis of (*E*)-diphenyl(styryl)phosphine oxide A.<sup>4</sup>

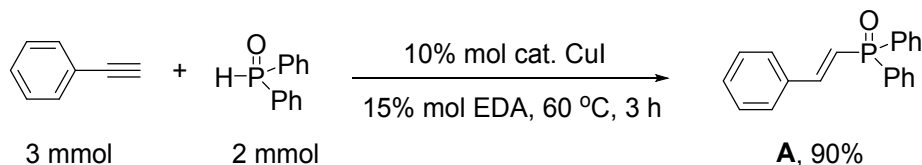

Diphenylphosphine oxide (2 mmol), ethynylbenzene (3 mmol), CuI (0.2 mmol) and ethylenediamine (EDA) (0.3 mmol) were dissolved in 5.0 mL DMSO under nitrogen atmosphere and heated at 60 °C for 3 h. The resulting solution was cooled to room temperature, and then 30 mL chloroform and 30 mL brine were added to the solution, the organic layer was washed with brine (20 mL × 2) and was dried over anhydrous Na<sub>2</sub>SO<sub>4</sub>. After filtration, the filtrate was concentrated *in vacuo* to give a pale yellow semisolid. The crude product was then purified by silica gel column chromatography using EtOAc/hexane (1:1) as the eluent to provide the pure target product as a pale white solid (*E*)-diphenyl(styryl)phosphine oxide **A** in 90% yield. <sup>1</sup>H NMR (400 MHz, CDCl<sub>3</sub>) δ 7.76 (t, 4H, *J* = 8.0 Hz), 7.47-7.51 (m, 9H), 7.36 (s, 3H), 6.84 (q, 1H, *J* = 18.0 Hz, *J* = 22.0 Hz); <sup>31</sup>P NMR (162 MHz, CDCl<sub>3</sub>) δ 24.4; <sup>13</sup>C NMR (100.6 MHz, CDCl<sub>3</sub>) δ 147.6 (d, *J*<sub>P-C</sub> = 3.5 Hz), 135.1 (d, *J*<sub>P-C</sub> = 17.9 Hz), 133.0 (d, *J*<sub>P-C</sub> = 105.8 Hz), 131.9 (d, *J*<sub>P-C</sub> = 2.5 Hz), 131.4 (d, *J*<sub>P-C</sub> = 10.0 Hz), 130.1, 128.9, 128.6 (d, *J*<sub>P-C</sub> = 12.1 Hz), 127.79, 119.3 (d, *J*<sub>P-C</sub> = 104.4 Hz). MS (EI): 304.

### Synthesis of Bisphosphorylethane compound B.<sup>6</sup>

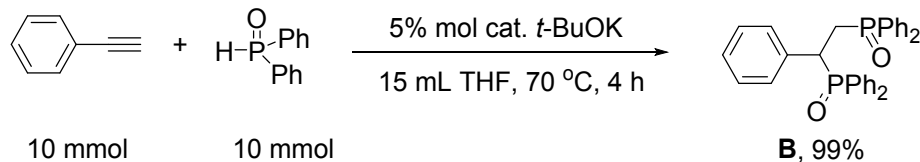

A mixture of diphenylphosphine oxide (10 mmol), ethynylbenzene (10 mmol), *t*-BuOK (0.5 mmol) and THF (15.0 mL) was heated at 70 °C for 4 h. The resulting solution was cooled to room temperature and then concentrated *in vacuo* to give a pale solid. The crude product was then purified by silica gel column chromatography using EtOAc/Petroleum ether (from 4:1 to 5:1) as the eluent to provide the pure target product as a pale white solid in 99% yield. <sup>1</sup>H NMR (CDCl<sub>3</sub>, 400 MHz) δ 8.06 (b, 2H), 7.08-7.78 (m, 20H), 8.85 (b, 3H), 4.30 (b, 1H), 3.18 (b, 1H), 2.88 (b, 1H); <sup>31</sup>P NMR (CDCl<sub>3</sub>, 162 MHz) δ 35.3 (d, *J* = 46.5 Hz), 30.1 (d, *J* = 47.1 Hz); <sup>13</sup>C NMR (CDCl<sub>3</sub>, 100.6 MHz) δ 134.4 (d, *J*<sub>C-P</sub> = 2.5 Hz), 134.1 (d, *J*<sub>C-P</sub> = 2.5 Hz), 134.1 (d, *J*<sub>C-P</sub> = 10.0 Hz), 133.4 (d, *J*<sub>C-P</sub> = 1.2 Hz), 133.4 (*J*<sub>C-P</sub> = 2.9 Hz), 131.9 (d, *J*<sub>C-P</sub> = 38.0 Hz), 131.8 (d, *J*<sub>C-P</sub> = 11.0 Hz), 131.8, 131.6, 131.5, 131.3 (d, *J*<sub>C-P</sub> = 1.4 Hz), 130.9 (d, *J*<sub>C-P</sub> = 10.6 Hz), 130.8, 130.7, 130.3, 130.2, 129.1 (d, *J*<sub>C-P</sub> = 11.5 Hz), 128.7 (d, *J*<sub>C-P</sub> = 11.5 Hz), 127.9 (d, *J*<sub>C-P</sub> = 11.1 Hz), 127.4 (d, *J*<sub>C-P</sub> = 88.8 Hz), 39.3 (d, *J*<sub>C-P</sub> = 64.6 Hz), 30.1 (d, *J*<sub>C-P</sub> = 68.7 Hz).

### Synthesis of raw materials *sp*C-deuterated phenylacetylene.<sup>5</sup>

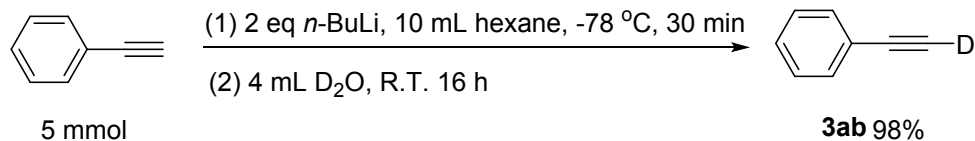

To a solution of phenylacetylene (5 mmol) in dry hexane (10 ml) was added *n*-BuLi (1.60 M in hexane solution, 2.0 equiv) dropwisely at -78 °C under N<sub>2</sub> atmosphere. After being stirred at the same temperature for 30 min, D<sub>2</sub>O (4 mL) was added at the room temperature under N<sub>2</sub> condition,

stirred continuously at the same temperature for 16 h and then stopped reaction. The organic layer was separated and the aqueous layer was extracted with CH<sub>2</sub>Cl<sub>2</sub>. The combined organic layers were washed with CH<sub>2</sub>Cl<sub>2</sub> (10 mL × 3), dried over Na<sub>2</sub>SO<sub>4</sub> and filtered. The filtrate was concentrated in *vacuo* to afford the corresponding target product with 98% deuterium incorporation.<sup>5</sup> <sup>1</sup>H NMR (400 MHz, CDCl<sub>3</sub>) δ 7.41 (d, 2H, *J* = 6.8 Hz), 7.22-7.28 (m, 3H), 2.99 (s, 0.02H).

### The reductive addition of diphenyl phosphine oxide to *sp*C-deuterated phenylacetylene.

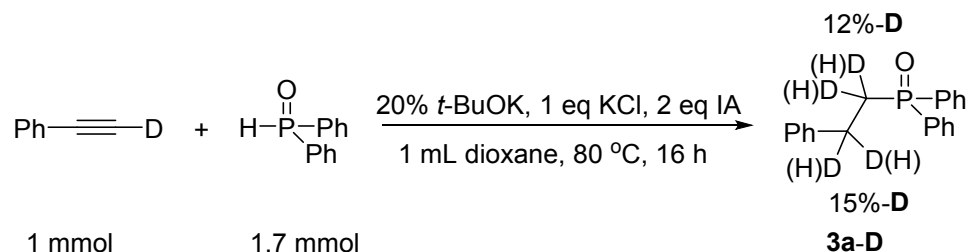

Under N<sub>2</sub> atmosphere, 1.7 mmol diphenylphosphine oxide, 1 mmol *sp*C-deuterated phenylacetylene, 1 mmol KCl, 2 mmol isopropyl alcohol (IA), 0.2 mmol *t*-BuOK and 4.0 mL dioxane were charged into a 25 mL schlenk tube, then the mixture was stirred at 80 °C for 16 h. After removal of the volatiles, the residues were passed through a short silica chromatography column (particle size 37–54 μm, petroleum ether/ethyl acetate as the eluent) to afford analytically pure products **3a-D**. <sup>1</sup>H NMR (400 MHz, CDCl<sub>3</sub>) δ 7.77 (dd, 4H, *J* = 8.4 Hz, *J* = 10.4 Hz), 7.46-7.54 (m, 6H), 7.25 (d, 2H, *J* = 7.6 Hz), 7.15-7.19 (m, 3H), 2.90-2.96 (m, 1.7H), 2.55-2.62 (m, 1.8H). <sup>31</sup>P NMR (162 MHz, CDCl<sub>3</sub>): δ 31.8. <sup>13</sup>C NMR (100.6 MHz, CDCl<sub>3</sub>): δ 141.2 (d, *J*<sub>C-P</sub> = 15.2 Hz), 132.7 (d, *J*<sub>C-P</sub> = 97.8 Hz), 131.9 (d, *J*<sub>C-P</sub> = 1.7 Hz), 130.8 (d, *J*<sub>C-P</sub> = 9.3 Hz), 128.8, 128.7 (d, *J*<sub>C-P</sub> = 7.4 Hz), 128.1, 126.4, 31.9 (31.80) (d, *J*<sub>C-P</sub> = 69.4 Hz), 27.5 (dd, *J*<sub>C-P</sub> = 3.0 Hz, *J*<sub>C-D</sub> = 9.0 Hz).

### H-D exchange of **3a** with D<sub>2</sub>O under the reaction conditions:

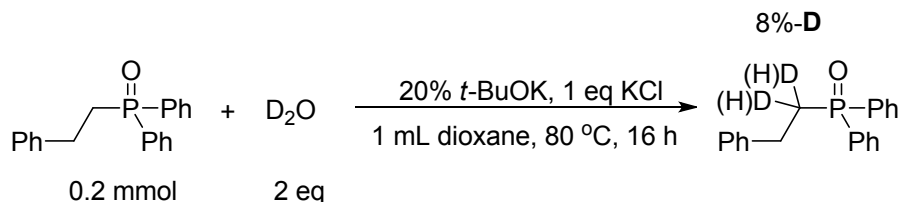

Under N<sub>2</sub> atmosphere, 0.2 mmol **3a**, 0.4 mmol D<sub>2</sub>O, 0.2 mmol KCl, 0.04 mmol *t*-BuOK and 1.0 mL dioxane were charged into a 25 mL schlenk tube, then the mixture was stirred at 80 °C for 16 h. After the reaction was cooled, reaction mixture was evaporated under the reduced pressure, as indicated from <sup>1</sup>H NMR spectroscopy, the C adjacent to phosphoryl group was deuterated with ca. 8% of deuterium incorporation. <sup>1</sup>H NMR (400 MHz, CDCl<sub>3</sub>) δ 7.77 (dd, 4H, *J* = 8.0 Hz, *J* = 11.6 Hz), 7.46-7.55 (m, 6H), 7.26 (dd, 2H, *J* = 7.2 Hz, *J* = 7.6 Hz), 7.15-7.19 (m, 3H), 2.90-2.95 (m, 2H), 2.56-2.63 (m, 1.83H).

### H<sub>2</sub> detection by GC:

Under N<sub>2</sub> atmosphere, 1 mmol ethynylbenzene, 1.7 mmol diphenylphosphine oxide compounds, 1 mmol KCl, 2 mmol isopropyl alcohol (IA), 0.2 mmol *t*-BuOK and 4.0 mL dioxane were charged into a 25 mL schlenk tube, then the mixture was stirred at 80 °C for 16 h. After the reaction was cooled to room temperature, the gas was analyzed by GC (Agilent

Technologies 7820A GC system, TCD detector, AE.5A column, oven temperature: 50 °C, carrier: Ar, 45 mL/min.). The pick time was checked by standard samples.

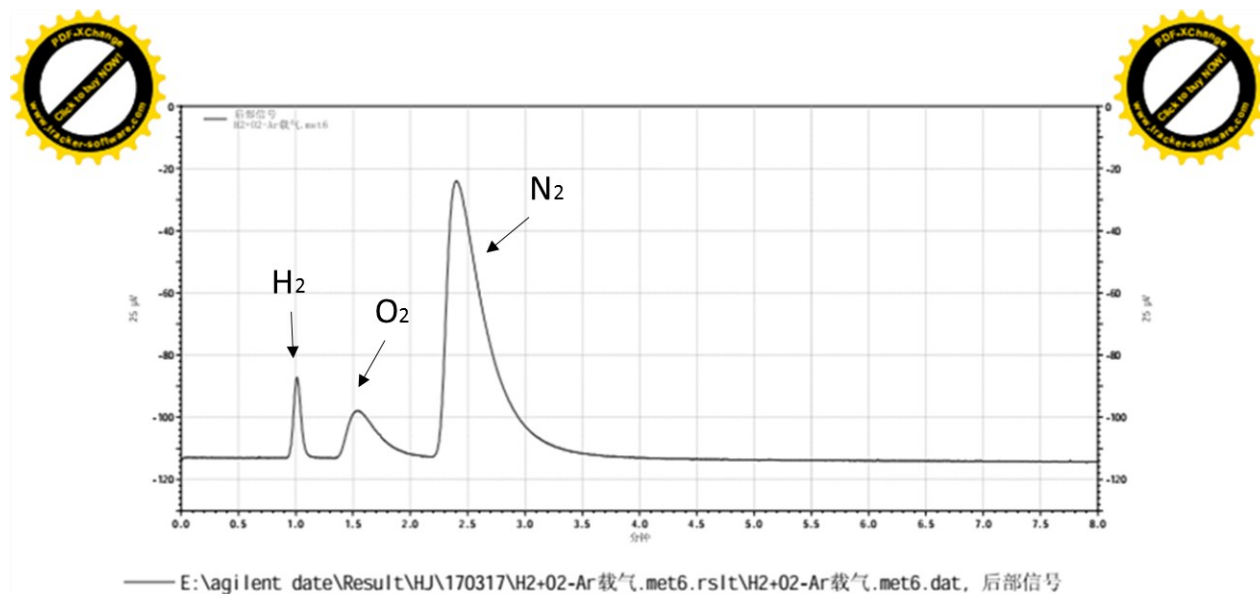

### Characterization data of products 3.

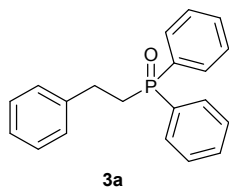

**Phenethyldiphenylphosphine oxide (3a).**<sup>3</sup> Following the general procedure, **3a** was isolated as a white crystals (275.4 mg, 90%). <sup>1</sup>H NMR (400 MHz, CDCl<sub>3</sub>) δ 7.77 (dd, 4H, *J* = 8.0 Hz, *J* = 11.6 Hz), 7.46-7.55 (m, 6H), 7.26 (dd, 2H, *J* = 7.2 Hz, *J* = 7.6 Hz), 7.15-7.19 (m, 3H), 2.90-2.96 (m, 2H), 2.55-2.62 (m, 2H); <sup>31</sup>P NMR (162 MHz, CDCl<sub>3</sub>) δ 31.7; <sup>13</sup>C NMR (100.6 MHz, CDCl<sub>3</sub>) δ 141.2 (d, *J*<sub>P-C</sub> = 15.3 Hz), 132.8 (d, *J*<sub>P-C</sub> = 97.8 Hz), 131.9 (d, *J*<sub>P-C</sub> = 2.8 Hz), 130.8 (d, *J*<sub>P-C</sub> = 9.2 Hz), 128.8, 128.7 (d, *J*<sub>P-C</sub> = 6.4 Hz), 128.1, 126.4, 31.9 (d, *J*<sub>P-C</sub> = 69.5 Hz), 27.6 (d, *J*<sub>P-C</sub> = 3.1 Hz). MS (EI): 306. This compound is known.

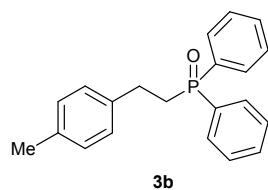

**(4-methylphenethyl)diphenylphosphine oxide (3b).** Following the general procedure, 1.0 equiv *t*-BuOK was used. **3b** was isolated as a white crystals (294.4 mg, 92%). <sup>1</sup>H NMR (400 MHz, CDCl<sub>3</sub>): δ 7.76 (dd, 4H, *J* = 7.6 Hz, *J* = 11.2 Hz), 7.45-7.54 (m, 6H), 7.06 (b, 4H), 2.83-2.92 (m, 2H), 2.53-2.60 (m, 2H), 2.30 (s, 3H). <sup>31</sup>P NMR (162 MHz, CDCl<sub>3</sub>): δ 31.5. <sup>13</sup>C NMR (100.6 MHz, CDCl<sub>3</sub>): δ 138.1 (d, *J*<sub>C-P</sub> = 15.4 Hz), 135.9, 132.9 (d, *J*<sub>C-P</sub> = 97.5 Hz), 131.8 (d, *J*<sub>C-P</sub> = 2.6 Hz), 130.8 (d, *J*<sub>C-P</sub> = 9.3 Hz), 129.3, 128.7 (d, *J*<sub>C-P</sub> = 11.6 Hz), 127.9, 32.0 (d, *J*<sub>C-P</sub> = 69.3 Hz), 27.1 (d, *J*<sub>C-P</sub> = 3.0 Hz), 20.9. Melting point: 123.7~123.8 °C. HRMS: Cal. for C<sub>21</sub>H<sub>21</sub>OP 320.1330. Found 320.1336.

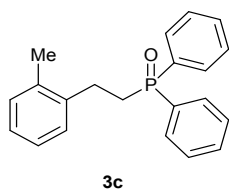

**(2-methylphenethyl)diphenylphosphine oxide (3c).** Following the general procedure, **3c** was isolated as a white crystals (294.6 mg, 92%). <sup>1</sup>H NMR (400 MHz, CDCl<sub>3</sub>): δ 7.78 (dd, 4H, *J* = 7.2 Hz, *J* = 11.2 Hz), 7.45-7.54 (m, 6H), 7.10 (b, 4H), 2.88-2.94 (m, 2H), 2.47-2.55 (m, 2H), 2.20 (s, 3H). <sup>31</sup>P NMR (162 MHz, CDCl<sub>3</sub>): δ 31.6. <sup>13</sup>C NMR (100.6 MHz, CDCl<sub>3</sub>): δ 139.4 (d, *J*<sub>C-P</sub> = 14.9 Hz), 135.8, 132.9 (d, *J*<sub>C-P</sub> = 97.5 Hz), 131.8 (d, *J*<sub>C-P</sub> = 2.7 Hz), 130.8 (d, *J*<sub>C-P</sub> = 9.2 Hz), 130.4, 128.7 (d, *J*<sub>C-P</sub> = 11.6 Hz), 128.4, 126.5, 126.3, 30.6 (d, *J*<sub>C-P</sub> = 69.1 Hz), 24.9 (d, *J*<sub>C-P</sub> = 3.0 Hz), 19.1. Melting point: 109.0~109.3 °C. HRMS: Cal. for C<sub>21</sub>H<sub>21</sub>OP 320.1330. Found 320.1325.

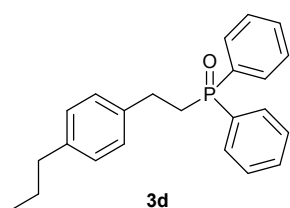

**(4-propylphenethyl)diphenylphosphine oxide (3d).** Following the general procedure, **3d** was isolated as a white crystals (285.4 mg, 82%). <sup>1</sup>H NMR (400 MHz, CDCl<sub>3</sub>): δ 7.76 (dd, 4H, *J* = 7.6 Hz, *J* = 10.8 Hz), 7.45-7.54 (m, 6H), 7.07 (b, 4H), 2.87-2.93 (m, 2H), 2.51-2.61 (m, 4H), 1.55-1.64 (m, 2H), 0.92 (t, 3H, *J* = 7.2 Hz). <sup>31</sup>P NMR (162 MHz CDCl<sub>3</sub>): δ 31.7. <sup>13</sup>C NMR (100.6 MHz, CDCl<sub>3</sub>): δ 140.7, 138.4 (d, *J*<sub>C-P</sub> = 15.3 Hz), 132.9 (d, *J*<sub>C-P</sub> = 97.2 Hz), 131.8 (d, *J*<sub>C-P</sub> = 2.7 Hz), 130.8 (d, *J*<sub>C-P</sub> = 9.2 Hz), 128.7 (d, *J*<sub>C-P</sub> = 11.5 Hz), 128.7, 127.9, 37.6, 31.9 (d, *J*<sub>C-P</sub> = 69.2 Hz), 27.1 (d, *J*<sub>C-P</sub> = 3.1 Hz), 24.6, 13.8. MS (EI): 348. Melting point: 100.0~101.3°C. HRMS: Cal. for C<sub>23</sub>H<sub>25</sub>OP 348.1643. Found 348.1631.

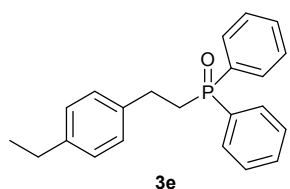

**(4-ethylphenethyl)diphenylphosphine oxide (3e).** Following the general procedure, **3e** was isolated as a pale white crystals (276 mg, 80%). <sup>1</sup>H NMR (400 MHz, CDCl<sub>3</sub>): δ 7.76 (dd, 4H, *J* = 7.6 Hz, *J* = 10.4 Hz), 7.43-7.54 (m, 6H), 7.08 (b, 4H), 2.87-2.93 (m, 2H), 2.54-2.62 (m, 4H), 1.20 (t, 3H, *J* = 7.6 Hz). <sup>31</sup>P NMR (162 MHz, CDCl<sub>3</sub>): δ 31.7. <sup>13</sup>C NMR (100.6 MHz, CDCl<sub>3</sub>): δ 142.3, 138.4 (d, *J*<sub>C-P</sub> = 15.2 Hz), 132.9 (d, *J*<sub>C-P</sub> = 97.6 Hz), 131.8 (d, *J*<sub>C-P</sub> = 2.7 Hz), 130.8 (d, *J*<sub>C-P</sub> = 9.3 Hz), 128.7 (d, *J*<sub>C-P</sub> = 11.6 Hz), 128.1, 128.1, 31.9 (d, *J*<sub>C-P</sub> = 69.3 Hz), 28.4, 27.1 (d, *J*<sub>C-P</sub> = 3.0 Hz), 15.7. Melting point: 69 °C. HRMS: Cal. for C<sub>22</sub>H<sub>23</sub>OP 334.1487. Found 334.1470.

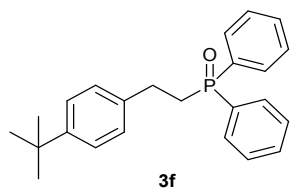

**(4-(tert-butyl)phenethyl)diphenylphosphine oxide (3f).** Following the general procedure, **3f** was isolated as a white crystals (293.2 mg, 81%). <sup>1</sup>H NMR (400 MHz, CDCl<sub>3</sub>): δ 7.68 (dd, 4H, *J* = 7.2 Hz, *J* = 11.2 Hz), 7.36-7.45 (m, 6H), 7.20 (d, 2H, *J* = 8.0 Hz), 7.02 (d, 2H, *J* = 8.0 Hz), 2.80-2.86 (m, 2H), 2.47-2.54 (m, 2H), 1.21 (s, 9H). <sup>31</sup>P NMR (162 MHz, CDCl<sub>3</sub>): δ 31.6. <sup>13</sup>C NMR (100.6 MHz, CDCl<sub>3</sub>): δ 149.2, 138.1 (d, *J*<sub>C-P</sub> = 15.2 Hz), 132.9 (d, *J*<sub>C-P</sub> = 97.6 Hz), 131.8 (d, *J*<sub>C-P</sub> = 2.7 Hz), 130.8 (d, *J*<sub>C-P</sub> = 9.2 Hz), 128.8 (d, *J*<sub>C-P</sub> = 11.6 Hz), 127.8, 125.508, 34.4, 31.8 (d, *J*<sub>C-P</sub> = 69.4 Hz), 31.4, 26.9 (d, *J*<sub>C-P</sub> = 2.1 Hz). Melting point: 118.6 °C. HRMS: Cal. for C<sub>24</sub>H<sub>27</sub>OP 362.1800. Found 362.1780.

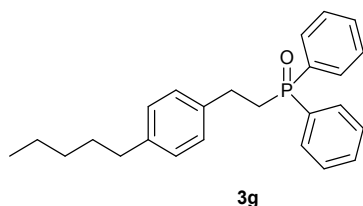

**(4-pentylphenethyl)diphenylphosphine oxide (3g).** Following the general procedure, 1.0 equiv *t*-BuOK was loaded. **3g** was isolated as a white crystals (315.8 mg, 84%). <sup>1</sup>H NMR (400 MHz, CDCl<sub>3</sub>): δ 7.77 (dd, 4H, *J* = 7.6 Hz, *J* = 11.2 Hz), 7.44-7.53 (m, 6H), 7.07 (b, 4H), 2.87-2.93 (m, 2H), 2.52-2.61 (m, 4H), 1.54-1.61 (m, 2H), 1.28-1.35 (m, 4H), 0.88 (t, 3H, *J* = 6.0 Hz). <sup>31</sup>P NMR (162 MHz, CDCl<sub>3</sub>): δ 31.5. <sup>13</sup>C NMR (100.6 MHz, CDCl<sub>3</sub>): δ 140.9, 138.3 (d, *J*<sub>C-P</sub> = 15.2 Hz), 132.9 (d, *J*<sub>C-P</sub> = 97.5 Hz), 131.8 (d, *J*<sub>C-P</sub> = 2.6 Hz), 130.8 (d, *J*<sub>C-P</sub> = 9.2 Hz), 128.7 (d, *J*<sub>C-P</sub> = 11.6 Hz), 128.6, 127.9, 35.5, 31.9 (d, *J*<sub>C-P</sub> = 69.3 Hz), 31.5, 31.2, 27.1 (d, *J*<sub>C-P</sub> = 3.1 Hz), 22.5, 14.0. Melting point: 100.0~100.2 °C. HRMS: Cal. for C<sub>25</sub>H<sub>29</sub>OP 376.1956. Found 376.1944.

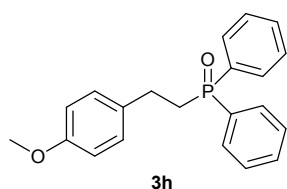

**(4-methoxyphenethyl)diphenylphosphine oxide (3h).**<sup>2</sup> Following the general procedure, 1.0 equiv *t*-BuOK was loaded. **3h** was isolated as a white crystals (292.3 mg, 87%). <sup>1</sup>H NMR (400 MHz, CDCl<sub>3</sub>): δ 7.75 (dd, 4H, *J* = 7.6 Hz, *J* = 11.2 Hz), 7.46-7.52 (m, 6H), 7.06 (d, 2H, *J* = 8.4 Hz), 6.78 (d, 2H, *J* = 8.4 Hz), 3.74 (s, 3H), 2.84-2.90 (m, 2H), 2.51-2.58 (m, 2H). <sup>31</sup>P NMR (162 MHz, CDCl<sub>3</sub>): δ 31.4. <sup>13</sup>C NMR (100.6 MHz, CDCl<sub>3</sub>): δ 158.1, 133.2 (d, *J*<sub>C-P</sub> = 15.4 Hz), 132.9 (d, *J*<sub>C-P</sub> = 97.5 Hz), 131.8 (d, *J*<sub>C-P</sub> = 2.6 Hz), 130.8 (d, *J*<sub>C-P</sub> = 9.2 Hz), 129.0, 128.7 (d, *J*<sub>C-P</sub> = 11.5 Hz), 114.0, 55.3, 32.1 (d, *J*<sub>C-P</sub> = 69.0 Hz), 26.7 (d, *J*<sub>C-P</sub> = 3.1 Hz). This compound is known.

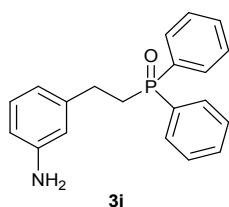

**(3-aminophenethyl)diphenylphosphine oxide (3i).** Following the general procedure, 1.0 equiv *t*-BuOK was loaded in 6 mL dioxane. **3i** was isolated as a pale yellow crystals (276.1 mg, 86%). <sup>1</sup>H NMR (400 MHz, CDCl<sub>3</sub>): δ 7.74 (dd, 4H, *J* = 8.0 Hz, *J* = 10.8 Hz), 7.37-7.51 (m, 6H), 7.00 (t, 1H,

$J = 7.6$  Hz), 6.45-6.52 (m, 3H), 3.67 (b, 2H), 2.77-2.83 (m, 2H), 2.49-2.56 (m, 2H).  $^{31}\text{P}$  NMR (162 MHz,  $\text{CDCl}_3$ ):  $\delta$  31.8.  $^{13}\text{C}$  NMR (100.6 MHz,  $\text{CDCl}_3$ ):  $\delta$  146.8, 142.4 (d,  $J_{\text{C-P}} = 15.2$  Hz), 132.8 (d,  $J_{\text{C-P}} = 97.7$  Hz), 131.8 (d,  $J_{\text{C-P}} = 2.6$  Hz), 130.8 (d,  $J_{\text{C-P}} = 9.2$  Hz), 129.5, 128.7 (d,  $J_{\text{C-P}} = 11.6$  Hz), 118.0, 114.8, 113.1, 31.7 (d,  $J_{\text{C-P}} = 69.4$  Hz), 27.5 (d,  $J_{\text{C-P}} = 3.0$  Hz). Melting point: 152.2~153.7 °C. HRMS: Cal. for  $\text{C}_{20}\text{H}_{20}\text{NOP}$  321.1283. Found 321.1275.

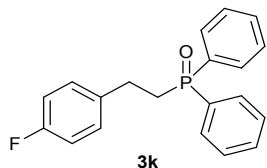

**(4-fluorophenethyl)diphenylphosphine oxide (3k).**<sup>2</sup> Following the general procedure, **3k** was isolated as a white crystals (181.4 mg, 56%).  $^1\text{H}$  NMR (400 MHz,  $\text{CDCl}_3$ )  $\delta$  7.75 (dd, 4H,  $J = 7.6$  Hz,  $J = 10.8$  Hz), 7.45-7.54 (m, 6H), 7.10 (dd, 2H,  $J = 7.6$  Hz,  $J = 5.6$  Hz), 6.92 (dd, 2H,  $J = 8.4$  Hz,  $J = 8.4$  Hz), 2.87-2.93 (m, 2H), 2.51-2.58 (m, 2H);  $^{31}\text{P}$  NMR (162 MHz,  $\text{CDCl}_3$ )  $\delta$  31.5;  $^{13}\text{C}$  NMR (100.6 MHz,  $\text{CDCl}_3$ )  $\delta$  161.5 (d,  $J_{\text{F-C}} = 242.9$  Hz), 136.7 (dd,  $J_{\text{F-C}} = 3.3$  Hz,  $J_{\text{P-C}} = 14.9$  Hz), 132.6 (d,  $J_{\text{P-C}} = 97.9$  Hz), 131.9 (d,  $J_{\text{P-C}} = 2.7$  Hz), 130.8 (d,  $J_{\text{P-C}} = 9.3$  Hz), 129.5 (d,  $J_{\text{F-C}} = 7.8$  Hz), 128.8 (d,  $J_{\text{P-C}} = 11.6$  Hz), 115.4 (d,  $J_{\text{F-C}} = 21.1$  Hz), 31.9 (d,  $J_{\text{P-C}} = 69.2$  Hz), 26.8 (d,  $J_{\text{P-C}} = 2.9$  Hz). MS (EI): 324. This compound is known.

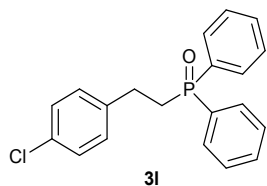

**(4-chlorophenethyl)diphenylphosphine oxide (3l).**<sup>2</sup> Following the general procedure, 1.0 equiv *t*-BuOK was used. **3l** was isolated as a pale white crystals (278.8 mg, 82%).  $^1\text{H}$  NMR (400 MHz,  $\text{CDCl}_3$ )  $\delta$  7.76 (dd, 4H,  $J = 8.0$  Hz,  $J = 8.0$  Hz), 7.46-7.56 (m, 6H), 7.21 (d, 2H,  $J = 8.0$  Hz), 7.08 (d, 2H,  $J = 8.0$  Hz), 2.88-2.94 (m, 2H), 2.52-2.58 (m, 2H);  $^{31}\text{P}$  NMR (162 MHz,  $\text{CDCl}_3$ )  $\delta$  31.4;  $^{13}\text{C}$  NMR (100.6 MHz,  $\text{CDCl}_3$ )  $\delta$  139.6 (d,  $J_{\text{P-C}} = 14.9$  Hz), 132.6 (d,  $J_{\text{P-C}} = 95.7$  Hz), 132.1 (d,  $J_{\text{P-C}} = 2.4$  Hz), 131.9 (d,  $J_{\text{P-C}} = 2.6$  Hz), 130.8 (d,  $J_{\text{P-C}} = 9.2$  Hz), 129.5, 128.8 (d,  $J_{\text{P-C}} = 11.5$  Hz), 128.7, 31.8 (d,  $J_{\text{P-C}} = 69.5$  Hz), 27.0 (d,  $J_{\text{P-C}} = 2.9$  Hz). MS (EI): 340. This compound is known.

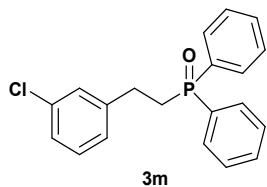

**(3-chlorophenethyl)diphenylphosphine oxide (3m).** Following the general procedure, **3m** was isolated as a pale white crystals (289.0 mg, 85%).  $^1\text{H}$  NMR (400 MHz,  $\text{CDCl}_3$ ):  $\delta$  7.75 (dd, 4H,  $J = 7.6$  Hz,  $J = 11.6$  Hz), 7.45-7.54 (m, 6H), 7.13-7.18 (m, 3H), 7.03 (d, 1H,  $J = 7.2$  Hz), 2.88-2.94 (m, 2H), 2.52-2.59 (m, 2H).  $^{31}\text{P}$  NMR (162 MHz,  $\text{CDCl}_3$ ):  $\delta$  31.1.  $^{13}\text{C}$  NMR (100.6 MHz,  $\text{CDCl}_3$ ):  $\delta$  143.1 (d,  $J_{\text{C-P}} = 15.0$  Hz), 134.3, 132.6 (d,  $J_{\text{C-P}} = 98.1$  Hz), 131.9 (d,  $J_{\text{C-P}} = 2.7$  Hz), 130.8 (d,  $J_{\text{C-P}} = 9.3$  Hz), 129.87, 128.8 (d,  $J_{\text{P-C}} = 11.5$  Hz), 128.2, 126.6, 126.4, 31.6 (d,  $J_{\text{C-P}} = 68.5$  Hz), 27.3 (d,  $J_{\text{C-P}} = 2.9$  Hz). Melting point: 125.6~126.9 °C. HRMS: Cal. for  $\text{C}_{20}\text{H}_{18}\text{ClOP}$  340.0784. Found 340.0773.

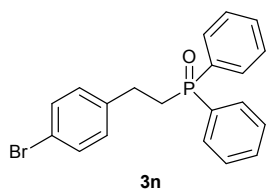

**(4-bromophenethyl)diphenylphosphine oxide (3n).** Following the general procedure, 1.0 equiv *t*-BuOK was loaded. **3n** was isolated as a white crystals (292.6 mg, 76%). <sup>1</sup>H NMR (400 MHz, CDCl<sub>3</sub>): δ 7.73 (dd, 4H, *J* = 7.6 Hz, *J* = 10.8 Hz), 7.42-7.51 (m, 6H), 7.31 (d, 2H, *J* = 8.0 Hz), 6.99 (d, 2H, *J* = 7.6 Hz), 2.83-2.89 (m, 2H), 2.48-2.55 (m, 2H). <sup>31</sup>P NMR (162 MHz, CDCl<sub>3</sub>): δ 31.1. <sup>13</sup>C NMR (100.6 MHz, CDCl<sub>3</sub>): δ 140.1 (d, *J*<sub>C-P</sub> = 14.7 Hz), 132.7 (d, *J*<sub>C-P</sub> = 97.9 Hz), 131.9 (d, *J*<sub>C-P</sub> = 2.6 Hz), 131.6, 130.7 (d, *J*<sub>C-P</sub> = 9.2 Hz), 129.9, 128.8 (d, *J*<sub>P-C</sub> = 11.6 Hz), 120.1, 31.7 (d, *J*<sub>C-P</sub> = 69.5 Hz), 27.1 (d, *J*<sub>C-P</sub> = 3.0 Hz). Melting point: 171.6~172.2 °C. HRMS: Cal. for C<sub>20</sub>H<sub>18</sub>BrOP 384.0279. Found 384.0280.

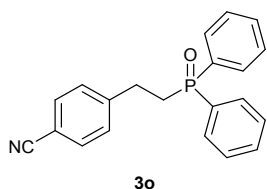

**4-(2-diphenylphosphoryl)ethyl)benzonitrile (3o).** Following the general procedure, **3o** was isolated as a white crystals (244.9 mg, 74%). <sup>1</sup>H NMR (400 MHz, CDCl<sub>3</sub>): δ 7.76 (dd, 4H, *J* = 7.6 Hz, *J* = 11.6 Hz), 7.47-7.57 (m, 8H), 7.27 (d, 2H, *J* = 8.0 Hz), 2.93-3.04 (m, 2H), 2.54-2.61 (m, 2H). <sup>31</sup>P NMR (162 MHz, CDCl<sub>3</sub>): δ 30.8. <sup>13</sup>C NMR (100.6 MHz, CDCl<sub>3</sub>): δ 146.6 (d, *J*<sub>C-P</sub> = 14.2 Hz), 132.4 (d, *J*<sub>C-P</sub> = 98.4 Hz), 132.4, 132.0 (d, *J*<sub>C-P</sub> = 2.7 Hz), 130.7 (d, *J*<sub>C-P</sub> = 9.3 Hz), 129.0, 128.8 (d, *J*<sub>C-P</sub> = 11.7 Hz), 118.8, 110.3, 31.3 (d, *J*<sub>C-P</sub> = 69.5 Hz), 27.8 (d, *J*<sub>C-P</sub> = 2.8 Hz). Melting point: 196.3~197.5 °C. HRMS: Cal. for C<sub>21</sub>H<sub>18</sub>NOP 331.1126. Found 331.1112.

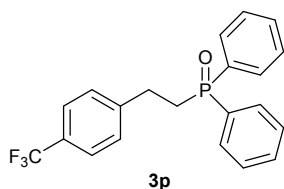

**Diphenyl(4-trifluoromethyl)phosphine oxide (3p).** Following the general procedure, **3p** was isolated as a white crystals (269.3 mg, 72%). <sup>1</sup>H NMR (400 MHz, CDCl<sub>3</sub>) δ 7.74 (dd, 4H, *J* = 7.6 Hz, *J* = 11.2 Hz), 7.09-7.20 (m, 8H), 6.90 (d, 2H, *J* = 7.6 Hz), 2.61-2.68 (m, 2H), 2.19-2.26 (m, 2H); <sup>31</sup>P NMR (162 MHz, CDCl<sub>3</sub>) δ 30.99; <sup>19</sup>F NMR (376 MHz, CDCl<sub>3</sub>) δ -62.43; <sup>13</sup>C NMR (100 MHz, CDCl<sub>3</sub>) δ 145.16 (db, *J*<sub>P-C</sub> = 14.2 Hz), 132.49 (d, *J*<sub>P-C</sub> = 98.1 Hz), 131.92 (d, *J*<sub>P-C</sub> = 2.7 Hz), 131.34 (q, *J*<sub>C-F</sub> = 10.0 Hz), 130.73 (d, *J*<sub>P-C</sub> = 9.3 Hz), 128.77 (d, *J*<sub>P-C</sub> = 11.6 Hz), 128.50, 125.47 (q, *J*<sub>F-C</sub> = 3.8 Hz), 123.91 (q, *J*<sub>F-C</sub> = 270.2 Hz), 31.50 (d, *J*<sub>P-C</sub> = 69.6 Hz), 27.49 (d, *J*<sub>P-C</sub> = 3.0 Hz). Melting point: 99.1~99.8 °C. MS (EI): 374. HRMS: Cal. for C<sub>21</sub>H<sub>18</sub>F<sub>3</sub>OP 374.1047. Found 374.1027.



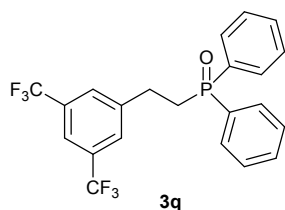

**(3, 5-bis(trifluoromethyl)phenethyl)diphenylphosphine oxide (3q).** Following the general procedure (80 °C, 16 h), 1.0 equiv *t*-BuOK was loaded. **3q** was isolated as a white crystals (344.7 mg, 78%). <sup>1</sup>H NMR (400 MHz, CDCl<sub>3</sub>) δ 7.75 (dd, 4H, *J* = 8.4 Hz), 7.67 (s, 1H), 7.60 (s, 2H), 7.46-7.56 (m, 6H), 3.104 (dt, 2H, *J* = 7.6 Hz, *J* = 8.8 Hz), 2.62 (dt, 2H, *J* = 7.6 Hz, *J* = 10.0 Hz); <sup>31</sup>P NMR (162 MHz, CDCl<sub>3</sub>) δ 30.5; <sup>19</sup>F NMR (376 MHz, CDCl<sub>3</sub>) δ -62.9; <sup>13</sup>C NMR (100.6 MHz, CDCl<sub>3</sub>) δ 143.3 (db, *J*<sub>P-C</sub> = 13.6 Hz), 132.2 (d, *J*<sub>P-C</sub> = 98.8 Hz), 132.1 (d, *J*<sub>P-C</sub> = 2.7 Hz), 131.8 (q, *J*<sub>F-C</sub> = 32.9 Hz), 131.72 (d, *J*<sub>P-C</sub> = 9.4 Hz), 128.6 (d, *J*<sub>P-C</sub> = 11.7 Hz), 128.5 (q, *J*<sub>F-C</sub> = 2.8 Hz), 123.2 (q, *J*<sub>F-C</sub> = 271.0 Hz), 120.5 (dq, *J*<sub>P-C</sub> = 3.7 Hz, *J*<sub>F-C</sub> = 3.7 Hz), 31.3 (d, *J*<sub>P-C</sub> = 69.6 Hz), 27.5 (d, *J*<sub>P-C</sub> = 2.9 Hz). Melting point: 151.6~152.8 °C. MS (EI): 442. HRMS: Cal. for C<sub>22</sub>H<sub>17</sub>F<sub>6</sub>OP 442.0921. Found 442.0907.

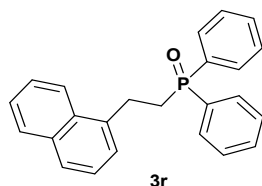

**(2-(naphthalene-1-yl)ethyl)diphenylphosphine oxide (3r).** Following the general procedure, **3r** was isolated as a pale yellow crystals (284.8 mg, 80%). <sup>1</sup>H NMR (400 MHz, CDCl<sub>3</sub>): δ 7.78-7.87 (m, 6H), 7.70 (d, 1H, *J* = 8.0 Hz), 7.46-7.55 (m, 8H), 7.29-7.37 (m, 2H), 3.36-3.42 (m, 2H), 2.66-2.72 (m, 2H). <sup>31</sup>P NMR (162 MHz, CDCl<sub>3</sub>): δ 31.5. <sup>13</sup>C NMR (100.6 MHz, CDCl<sub>3</sub>): δ 137.3 (d, *J*<sub>C-P</sub> = 14.5 Hz), 133.9, 132.9 (d, *J*<sub>C-P</sub> = 97.6 Hz), 131.9 (d, *J*<sub>C-P</sub> = 2.6 Hz), 131.3, 130.8 (d, *J*<sub>C-P</sub> = 9.3 Hz), 128.9, 128.8 (d, *J*<sub>C-P</sub> = 11.5 Hz), 127.2, 126.19, 125.8, 125.7, 125.6, 123.3, 31.2 (d, *J*<sub>C-P</sub> = 69.0 Hz), 24.8 (d, *J*<sub>C-P</sub> = 2.8 Hz). Melting point: 122.9~123.3 °C. HRMS: Cal. for C<sub>24</sub>H<sub>21</sub>OP 356.1330. Found 356.1318.

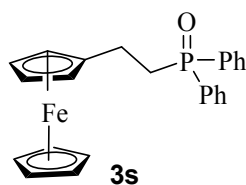

**Ferrocenethyldiphenylphosphine oxide (3s).** Following the general procedure, **3s** was isolated as a yellow crystals (339.4 mg, 82%). <sup>1</sup>H NMR (400 MHz CDCl<sub>3</sub>): δ 7.76 (dd, 4H, *J* = 7.6 Hz, *J* = 7.6 Hz), 7.48-7.54 (m, 6H), 4.06 (s, 5H), 4.03 (b, 4H), 2.62-2.68 (m, 2H), 2.46-2.52 (m, 2H). <sup>31</sup>P NMR (162 MHz CDCl<sub>3</sub>): δ 31.59. <sup>13</sup>C NMR (100 MHz CDCl<sub>3</sub>): δ 132.89 (d, *J*<sub>C-P</sub> = 97.6 Hz), 131.81 (d, *J*<sub>C-P</sub> = 2.7 Hz), 130.78 (d, *J*<sub>C-P</sub> = 9.3 Hz), 128.74 (d, *J*<sub>C-P</sub> = 11.5 Hz), 88.30 (d, *J*<sub>C-P</sub> = 18.1 Hz), 68.60, 67.70, 67.44, 31.47 (d, *J*<sub>C-P</sub> = 70.0 Hz), 21.55 (d, *J*<sub>C-P</sub> = 2.8 Hz). Melting point: 170.8~170.9 °C.

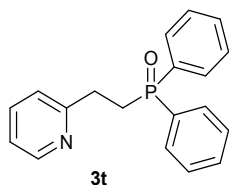

**Diphenyl(2-(pyridin-2-yl)ethyl)phosphine oxide (3t).**<sup>1, 2</sup> Following the general procedure, **3t** was isolated as a pale yellow crystals (214.9 mg, 70%). <sup>1</sup>H NMR (400 MHz, CDCl<sub>3</sub>): δ 8.47 (d, 2H, *J* = 4.8 Hz), 7.77 (dd, 4H, *J* = 7.6 Hz, *J* = 10.8 Hz), 7.42-7.53 (m, 7H), 7.11 (d, 1H, *J* = 8.0 Hz), 7.06 (dd, 1H, *J* = 6.4 Hz, *J* = 6.4 Hz), 3.07-3.13 (m, 2H), 2.74-2.81 (m, 2H). <sup>31</sup>P NMR (162 MHz, CDCl<sub>3</sub>): δ 32.3. <sup>13</sup>C NMR (100 MHz, CDCl<sub>3</sub>): δ 160.2 (d, *J*<sub>C-P</sub> = 14.4 Hz), 149.3, 136.5, 132.8 (d, *J*<sub>C-P</sub> = 98.9 Hz), 131.7 (d, *J*<sub>C-P</sub> = 2.7 Hz), 130.8 (d, *J*<sub>C-P</sub> = 9.3 Hz), 128.7 (d, *J*<sub>C-P</sub> = 11.6 Hz), 123.1, 121.5, 29.7 (d, *J*<sub>C-P</sub> = 2.7 Hz), 29.2 (d, *J*<sub>C-P</sub> = 71.1 Hz). This compound is known.

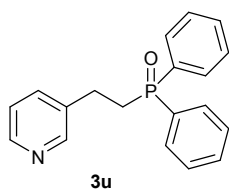

**Diphenyl(2-(pyridin-3-yl)ethyl)phosphine oxide (3u).** Following the general procedure, **3u** was isolated as a pale yellow crystals (211.8 mg, 69%). <sup>1</sup>H NMR (400 MHz, CDCl<sub>3</sub>): δ 8.39 (b, 2H), 7.74 (dd, 4H, *J* = 8.4 Hz, *J* = 10.0 Hz), 7.46-7.53 (m, 7H), 7.14 (b, 1H), 2.92 (dt, 2H, *J* = 7.6 Hz, *J* = 8.0 Hz), 2.55 (dt, 2H, *J* = 6.8 Hz, *J* = 10.4 Hz). <sup>31</sup>P NMR (162 MHz, CDCl<sub>3</sub>): δ 31.3. <sup>13</sup>C NMR (100.6 MHz, CDCl<sub>3</sub>): δ 149.5, 147.8, 136.4 (d, *J*<sub>C-P</sub> = 14.3 Hz), 135.7, 132.4 (d, *J*<sub>C-P</sub> = 98.3 Hz), 132.0 (d, *J*<sub>C-P</sub> = 2.6 Hz), 130.7 (d, *J*<sub>C-P</sub> = 9.3 Hz), 128.8 (d, *J*<sub>C-P</sub> = 11.6 Hz), 123.5, 31.5 (d, *J*<sub>C-P</sub> = 69.6 Hz), 24.9 (d, *J*<sub>C-P</sub> = 2.9 Hz). Melting point: 104.0~104.6 °C. HRMS: Cal. for C<sub>19</sub>H<sub>18</sub>NOP 307.1126. Found 307.1120.

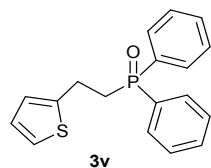

**Diphenyl(2-(thiophen-2-yl)ethyl)phosphine oxide (3v).** Following the general procedure, **3v** was isolated as a pale yellow crystals (227.7 mg, 73%). <sup>1</sup>H NMR (400 MHz, CDCl<sub>3</sub>): δ 7.75 (dd, 4H, *J* = 7.6 Hz, *J* = 10.8 Hz), 7.44-7.53 (m, 6H), 7.07 (d, 1H, *J* = 4.8 Hz), 6.84 (dd, 1H, *J* = 4.0 Hz, *J* = 4.0 Hz), 6.76 (b, 1H), 3.10-3.16 (m, 2H), 2.61-2.68 (m, 2H), <sup>31</sup>P NMR (162 MHz, CDCl<sub>3</sub>): δ 31.2. <sup>13</sup>C NMR (100 MHz, CDCl<sub>3</sub>): δ 143.8 (d, *J*<sub>C-P</sub> = 17.3 Hz), 132.5 (d, *J*<sub>C-P</sub> = 97.1 Hz), 131.9 (d, *J*<sub>C-P</sub> = 2.5 Hz), 130.8 (d, *J* = 9.4 Hz), 128.8 (d, *J* = 11.7 Hz), 126.9, 124.6, 123.6, 32.2 (d, *J*<sub>C-P</sub> = 69.2 Hz), 22.1 (d, *J*<sub>C-P</sub> = 2.4 Hz). Melting point: 125.2~127.9 °C. HRMS: Cal. for C<sub>18</sub>H<sub>17</sub>OPS 312.0738. Found 312.0731.

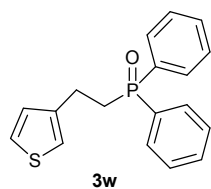

**Diphenyl(thiophen-3-yl)ethylphosphine oxide (3w).** Following the general procedure, 1.0 equiv *t*-BuOK was loaded. **3w** was isolated as a pale yellow crystals (268.3 mg, 86%). <sup>1</sup>H NMR (400 MHz, CDCl<sub>3</sub>): δ 7.75 (dd, 4H, *J* = 7.6 Hz, *J* = 10.2 Hz), 7.45-7.54 (m, 6H), 7.22 (b, 1H), 6.94 (b, 1H), 6.90 (d, 1H, *J* = 4.8 Hz), 2.93-2.99 (m, 2H), 2.55-2.62 (m, 2H). <sup>31</sup>P NMR (162 MHz, CDCl<sub>3</sub>): δ 31.47. <sup>13</sup>C NMR (100 MHz, CDCl<sub>3</sub>): δ 141.33 (d, *J*<sub>C-P</sub> = 15.7 Hz), 132.75 (d, *J*<sub>C-P</sub> = 97.8 Hz), 131.84 (d, *J*<sub>C-P</sub> = 2.7 Hz), 130.79 (d, *J*<sub>C-P</sub> = 9.3 Hz), 128.74 (d, *J*<sub>C-P</sub> = 11.6 Hz), 127.73, 125.90, 120.53, 30.97 (d, *J*<sub>C-P</sub> = 69.8 Hz), 22.22 (d, *J*<sub>C-P</sub> = 2.8 Hz). Melting point: 111.2~111.7 °C. HRMS: Cal. for C<sub>18</sub>H<sub>17</sub>OPS 312.0738. Found 312.0722.

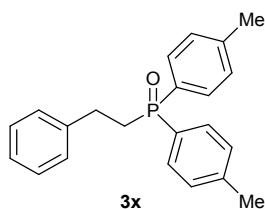

**Phenethyldi-*p*-tolylphosphine oxide (3x).** Following the general procedure, 1.0 equiv *t*-BuOK was loaded. **3x** was isolated as a white crystals (273.8 mg, 82%). <sup>1</sup>H NMR (400 MHz, CDCl<sub>3</sub>): δ 7.65 (dd, 4H, *J* = 8.0 Hz, *J* = 10.8 Hz), 7.22-7.27 (m, 6H), 7.14-7.16 (m, 3H), 2.89-2.95 (m, 2H), 2.50-2.57 (m, 2H), 2.37 (s, 6H). <sup>31</sup>P NMR (162 MHz, CDCl<sub>3</sub>): δ 31.8. <sup>13</sup>C NMR (100 MHz, CDCl<sub>3</sub>): δ 142.2 (d, *J*<sub>C-P</sub> = 2.7 Hz), 141.4 (d, *J*<sub>C-P</sub> = 15.3 Hz), 130.8 (d, *J*<sub>C-P</sub> = 9.6 Hz), 129.7 (d, *J*<sub>C-P</sub> = 100.1 Hz), 129.4 (d, *J*<sub>C-P</sub> = 11.9 Hz), 128.6, 128.1, 126.3, 32.1 (d, *J*<sub>C-P</sub> = 69.6 Hz), 27.6 (d, *J*<sub>C-P</sub> = 3.0 Hz), 21.6. Melting point: 99.5~100.4 °C. HRMS: Cal. for C<sub>22</sub>H<sub>23</sub>OP 334.1487. Found 334.1480.

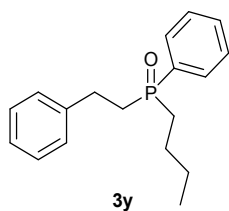

**Butyl(phenethyl)(phenyl)phosphine oxide (3y).** Following the general procedure, 0.5 equiv *t*-BuOK was loaded. **3y** was isolated as a colorless oil (225.9 mg, 79%). <sup>1</sup>H NMR (400 MHz, CDCl<sub>3</sub>): δ 7.69 (dd, 2H, *J* = 8.0 Hz, *J* = 8.0 Hz), 7.43-7.50 (m, 3H), 7.20 (dd, 2H, *J* = 7.6 Hz, *J* = 7.6 Hz), 7.08-7.13 (m, 3H), 2.89-2.99 (m, 1H), 2.61-2.71 (m, 1H), 2.27-2.33 (m, 1H), 2.07-2.17 (m, 1H), 1.78-1.99 (m, 2H), 1.54-1.62 (m, 1H), 1.27-1.43 (m, 3H), 0.82 (t, 3H, *J* = 7.2 Hz). <sup>31</sup>P NMR (162 MHz, CDCl<sub>3</sub>): δ 39.7. <sup>13</sup>C NMR (100.6 MHz, CDCl<sub>3</sub>): δ 141.2 (d, *J*<sub>C-P</sub> = 14.2 Hz), 132.3 (d, *J*<sub>C-P</sub> = 91.6 Hz), 131.6 (d, *J*<sub>C-P</sub> = 2.6 Hz), 130.4 (d, *J*<sub>C-P</sub> = 8.7 Hz), 128.7 (d, *J*<sub>C-P</sub> = 11.1 Hz), 128.6, 128.0, 126.3, 31.9 (d, *J*<sub>C-P</sub> = 65.7 Hz), 29.8 (d, *J*<sub>C-P</sub> = 68.1 Hz), 27.5 (d, *J*<sub>C-P</sub> = 3.3 Hz), 24.0 (d, *J*<sub>C-P</sub> = 14.4 Hz), 23.5 (d, *J*<sub>C-P</sub> = 4.1 Hz), 13.5. HRMS: Cal. for C<sub>18</sub>H<sub>23</sub>OP 286.1487. Found 286.1474.

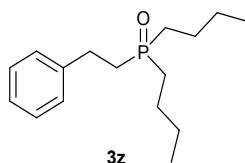

---

**Dibutyl(phenethyl)phosphine oxide (3z).** Following the general procedure, 1.0 equiv *t*-BuOK was loaded. **3z** was isolated as a colorless oil (170.2 mg, 64%). <sup>1</sup>H NMR (400 MHz, CDCl<sub>3</sub>): δ 7.31 (dd, 2H, *J* = 6.0 Hz, *J* = 6.0 Hz), 7.23 (parad, 3H, *J* = 6.0 Hz), 2.90-2.95 (m, 2H), 1.99-2.10 (m, 2H), 1.68-1.73 (m, 4H), 1.53-1.57 (m, 4H), 1.38-1.45 (m, 4H), 0.93 (t, 6H, *J* = 6.0 Hz). <sup>31</sup>P NMR (162 MHz, CDCl<sub>3</sub>): δ 48.2. <sup>13</sup>C NMR (100.6 MHz, CDCl<sub>3</sub>): δ 141.2 (d, *J*<sub>C-P</sub> = 10.3 Hz), 128.7, 128.1, 126.4, 29.7 (d, *J*<sub>C-P</sub> = 49.7 Hz), 27.8 (d, *J*<sub>C-P</sub> = 51.7 Hz), 27.7 (d, *J*<sub>C-P</sub> = 2.5 Hz), 24.3 (d, *J*<sub>C-P</sub> = 11.4 Hz), 23.8 (d, *J*<sub>C-P</sub> = 3.0 Hz), 13.6. MS (EI): 266.

---

**References:**

- (1) Jr R. A. S.; Taylor R. I.; Thompson L. E.; Patel P. B. *Org. Lett.* **2005**, *7*, 851.
- (2) Isley N. A.; Linstadt R. T. H.; Slack E. D.; Lipshutz B. H. *Dalton Trans.* **2014**, *43*, 13196.
- (3) Miao W.; Gao Y.; Li X.; Gao Y.; Tang G. Zhao Y. *Adv. Synth. Catal.* **2012**, *354*, 2659.
- (4) Niu M.; Fu H.; Jiang Y.; Zhao Y. *Chem. Commun.* **2007**, 272. DOI: 10.1039/B613416E.
- (5) Eisch J. J.; Liu W.; Zhu L.; Rheingold A. L. *Eur. J. Org. Chem.* **2015**, *2015*, 7384.
- (6) A. Yoshimura, Y. Saga, Y. Sato, A. Ogawa, T. Chen and L.-B. Han, *Tetrahedron Lett.*, **2016**, *57*, 3382.

# Copies of $^1\text{H}$ NMR, $^{31}\text{P}$ NMR and $^{13}\text{C}$ NMR spectroscopies

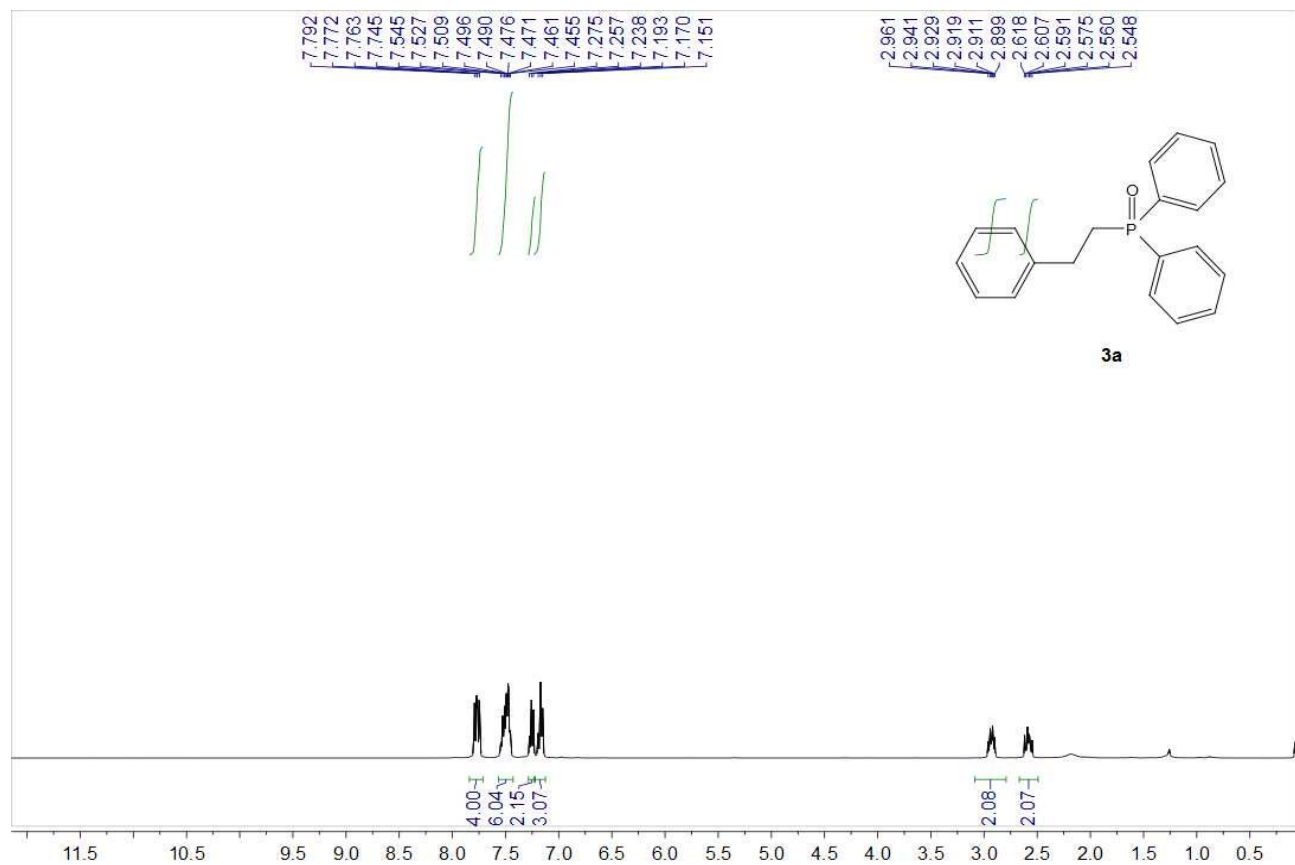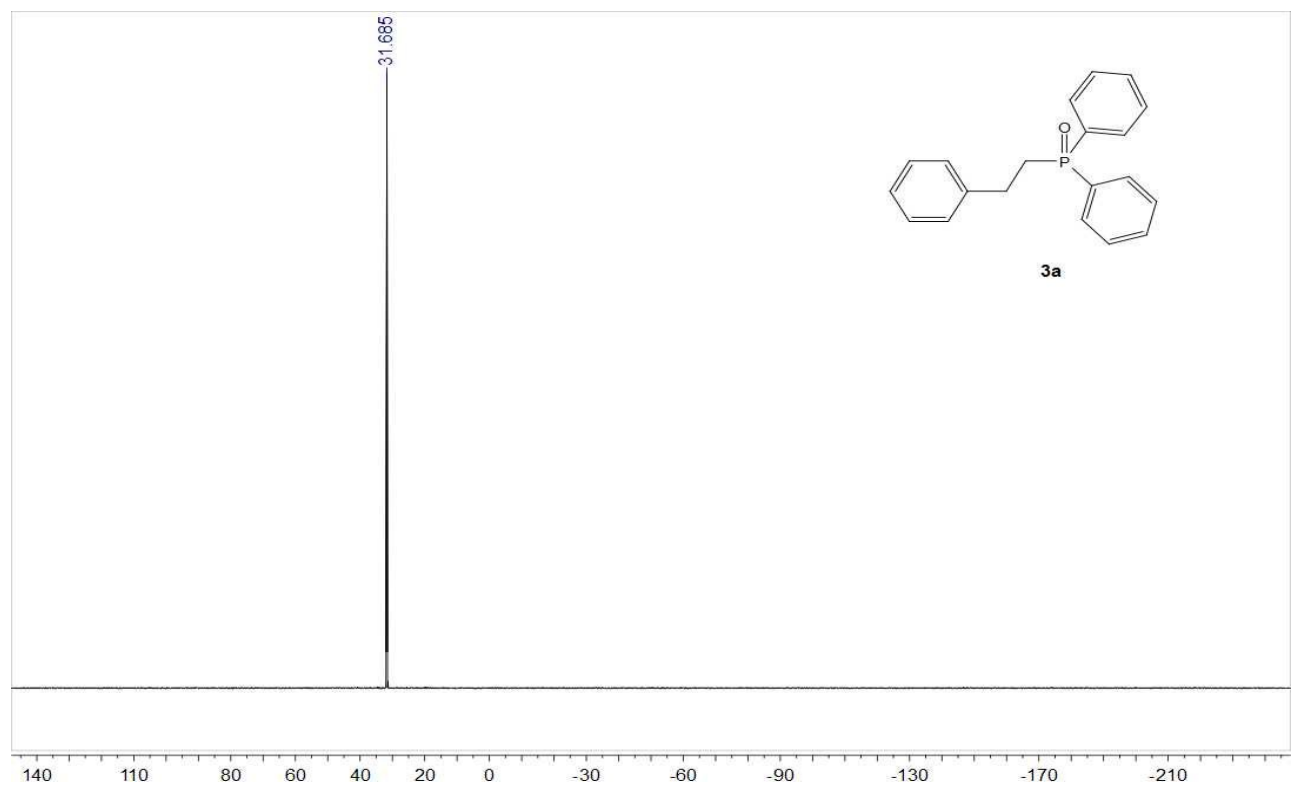

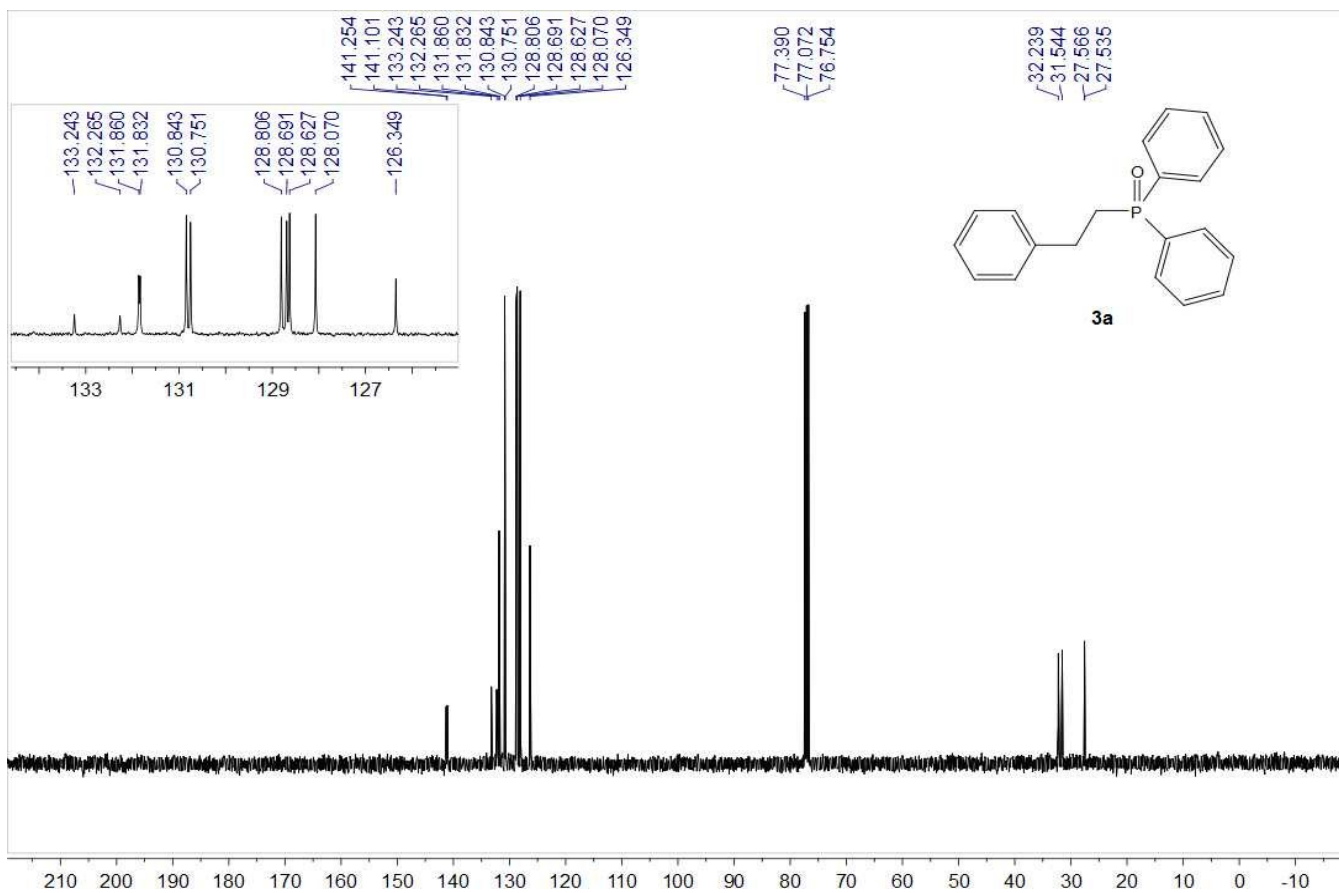

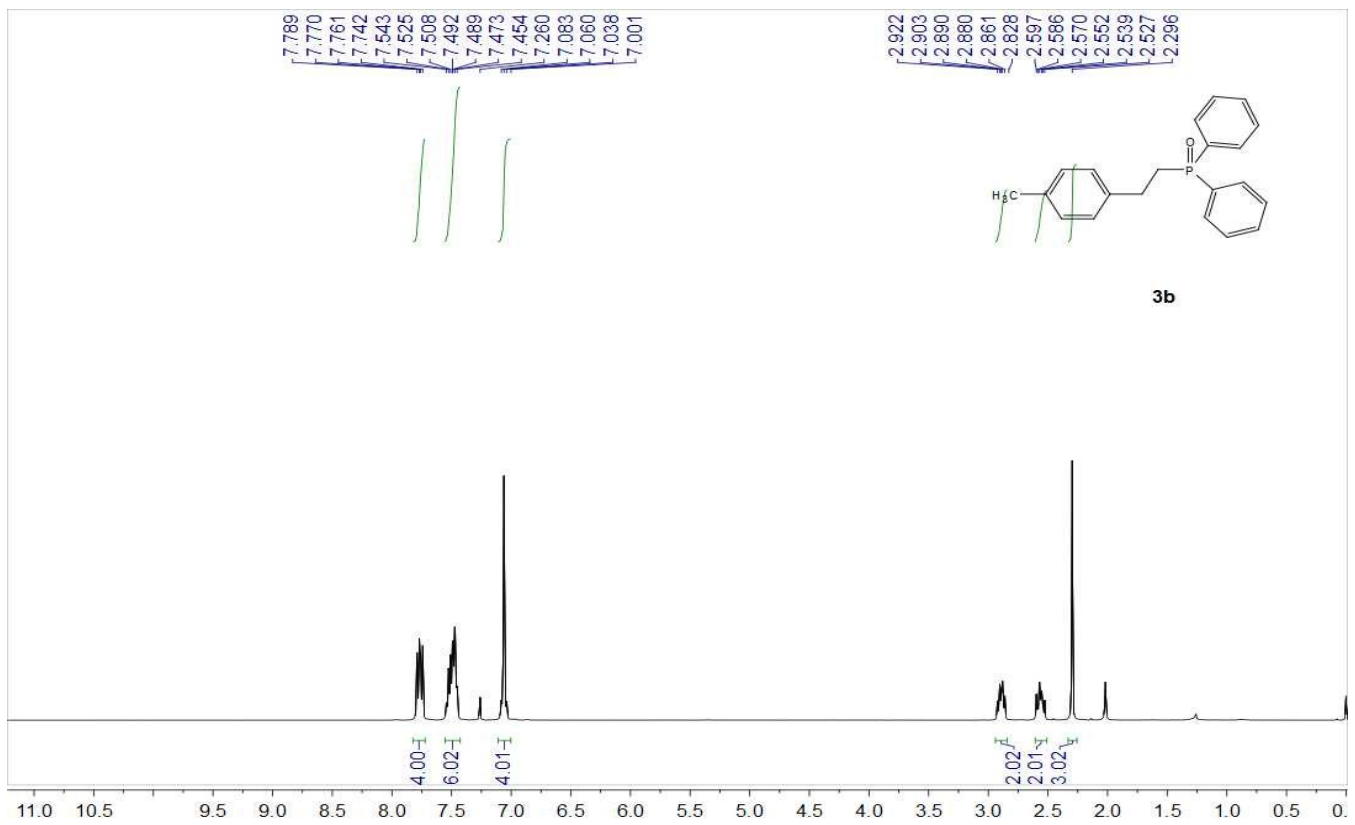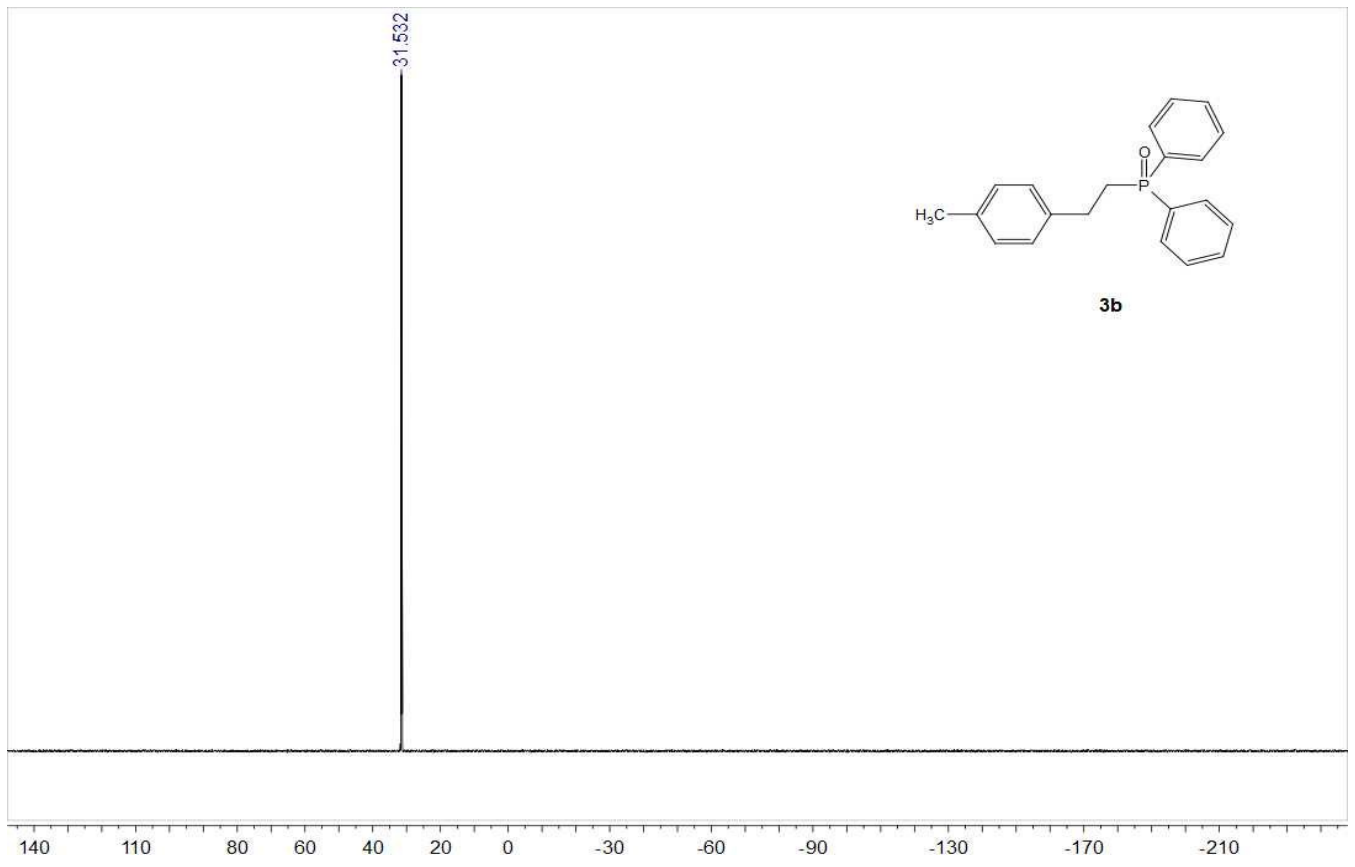



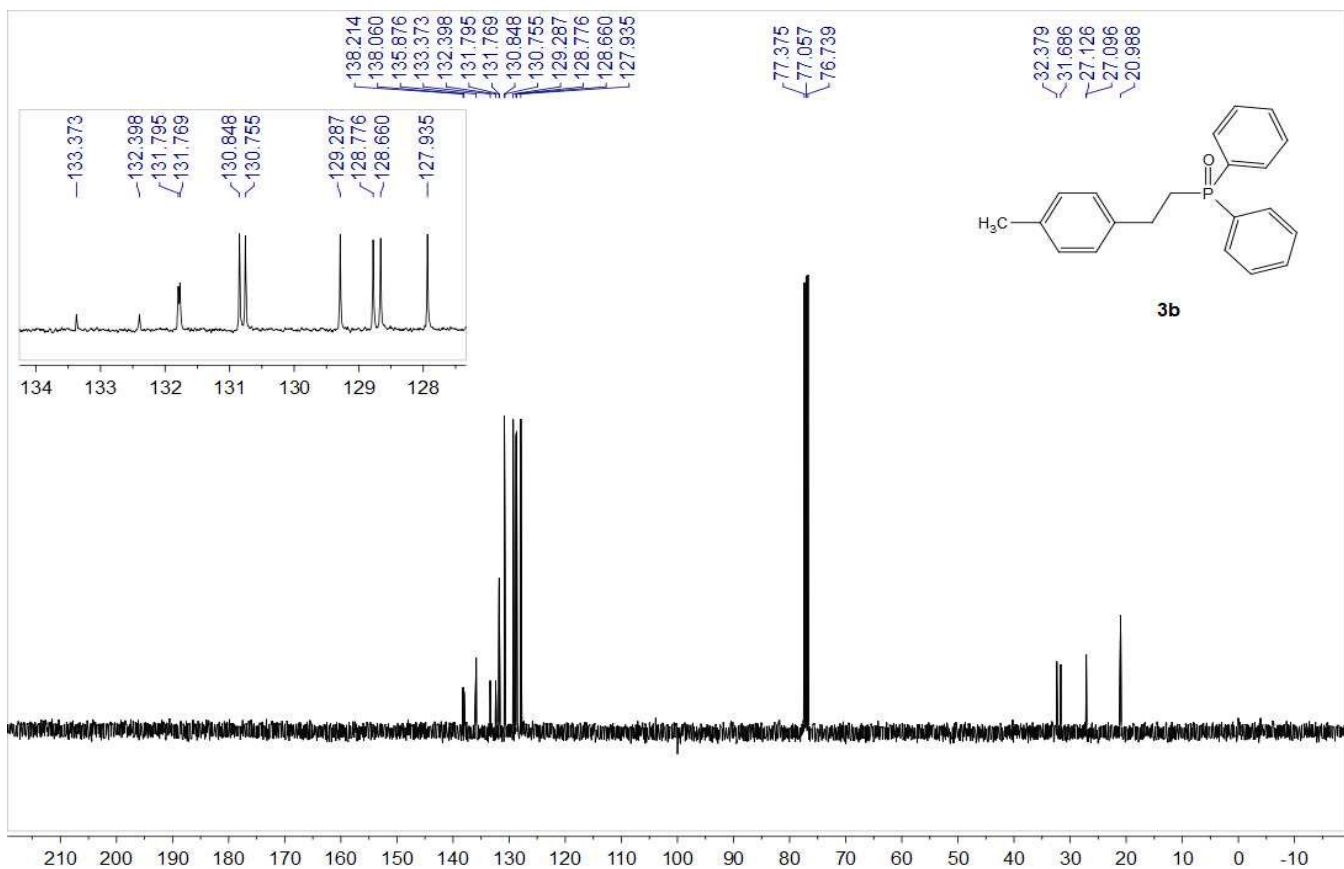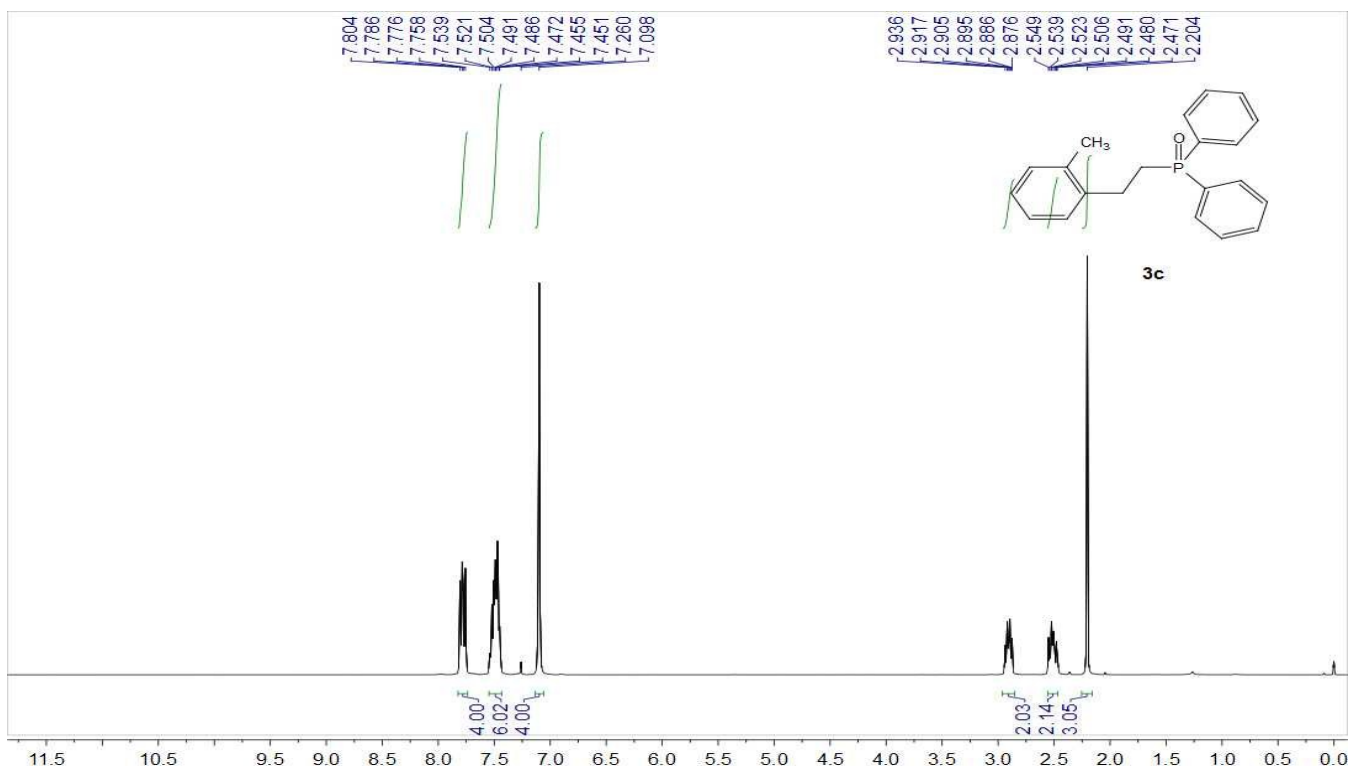

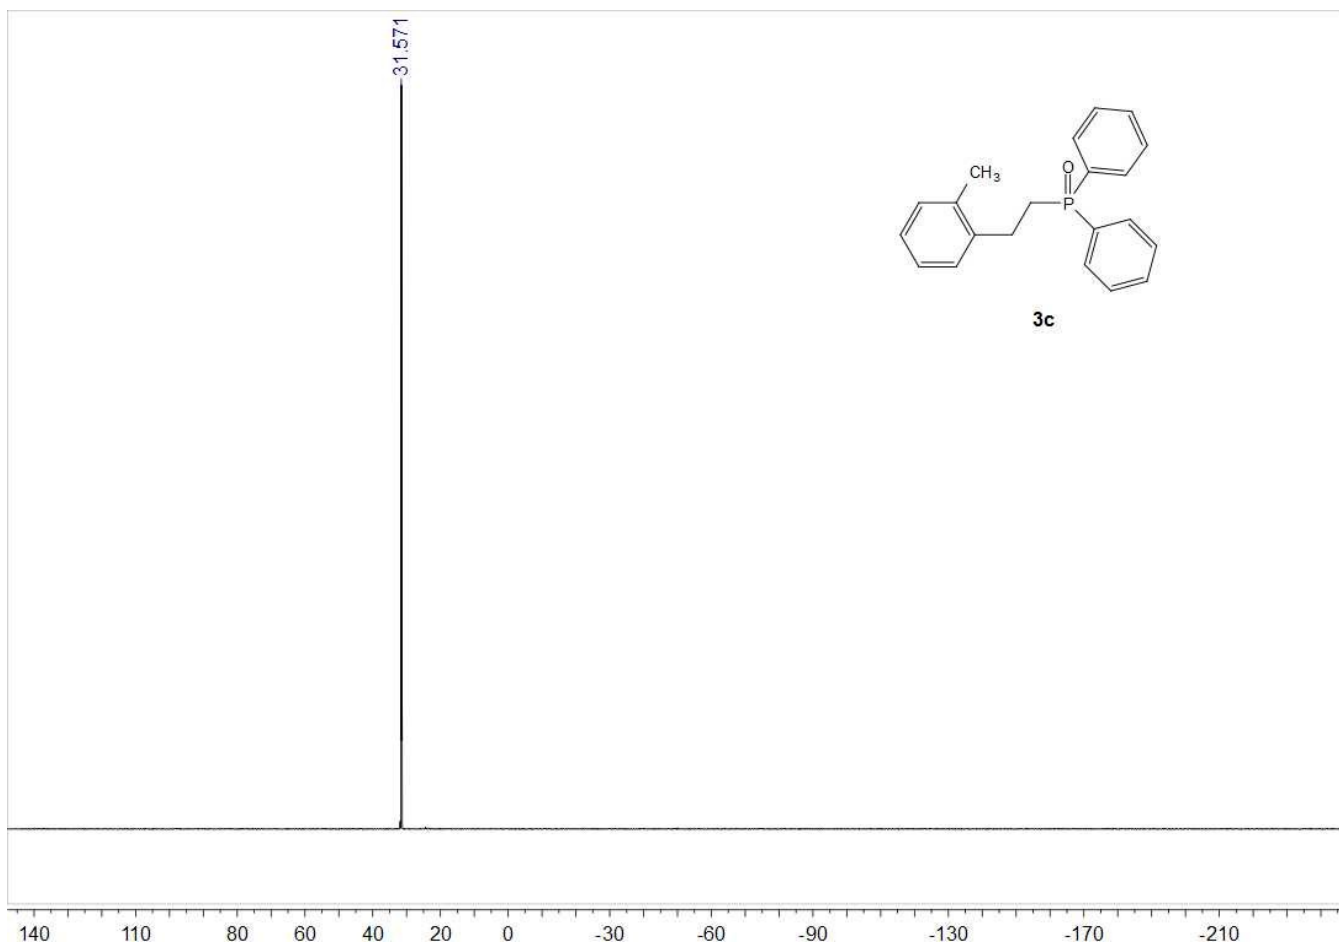

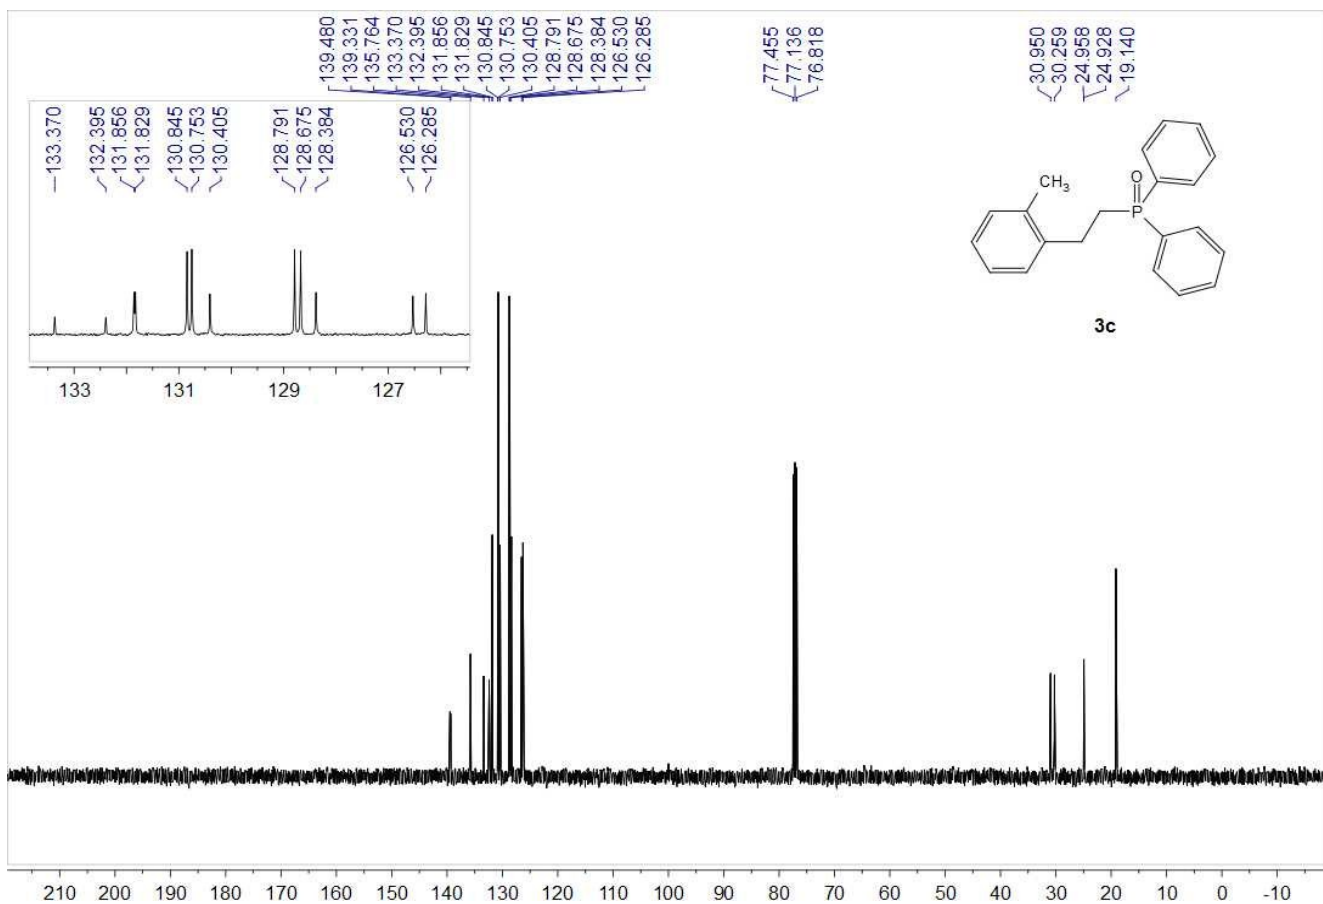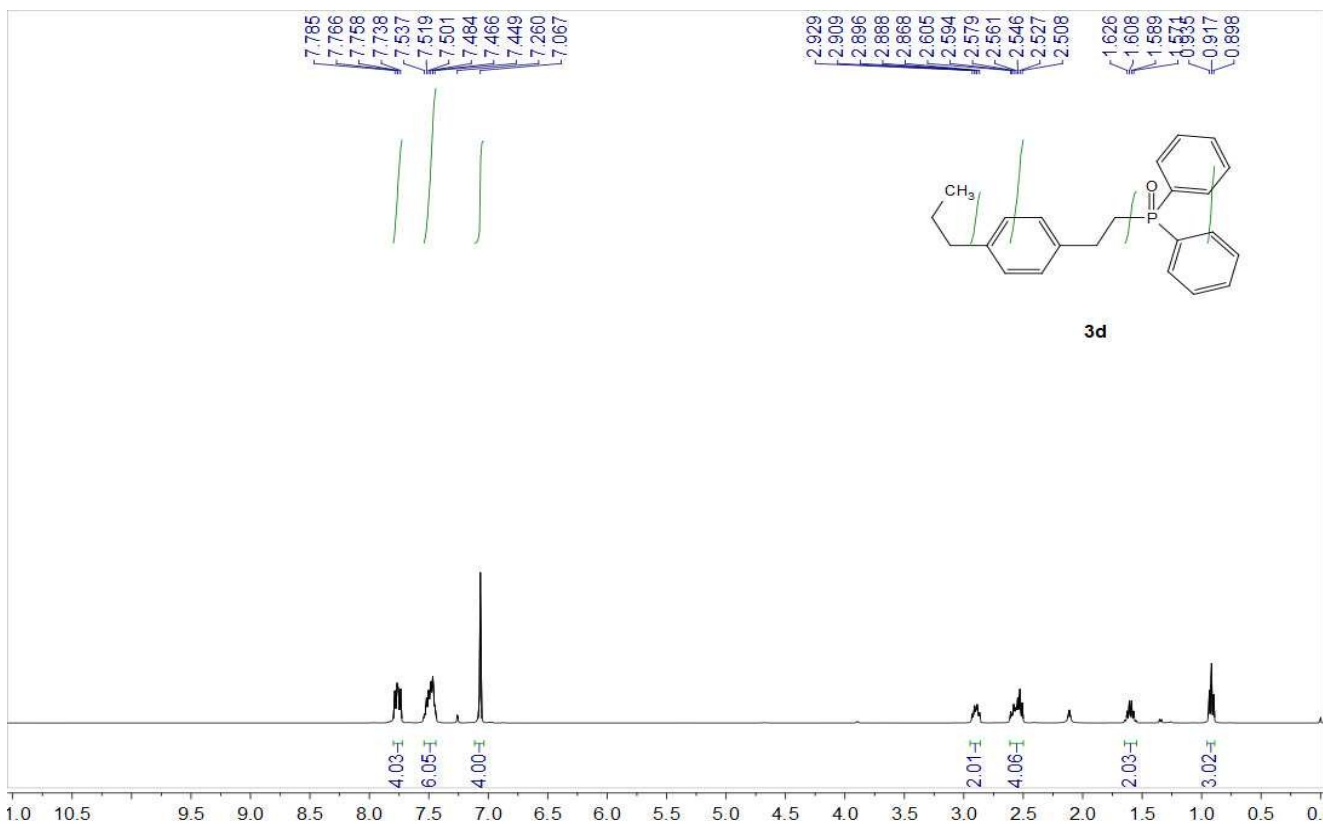

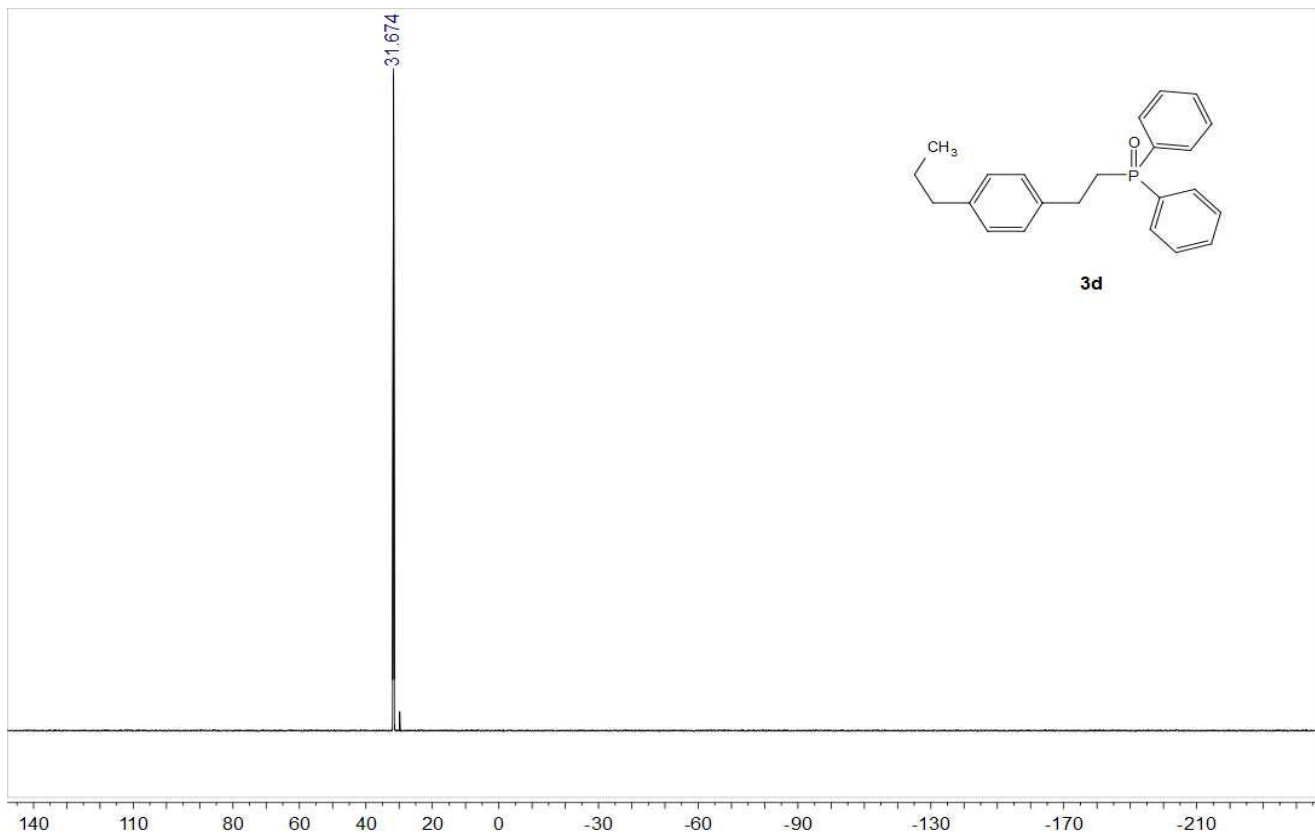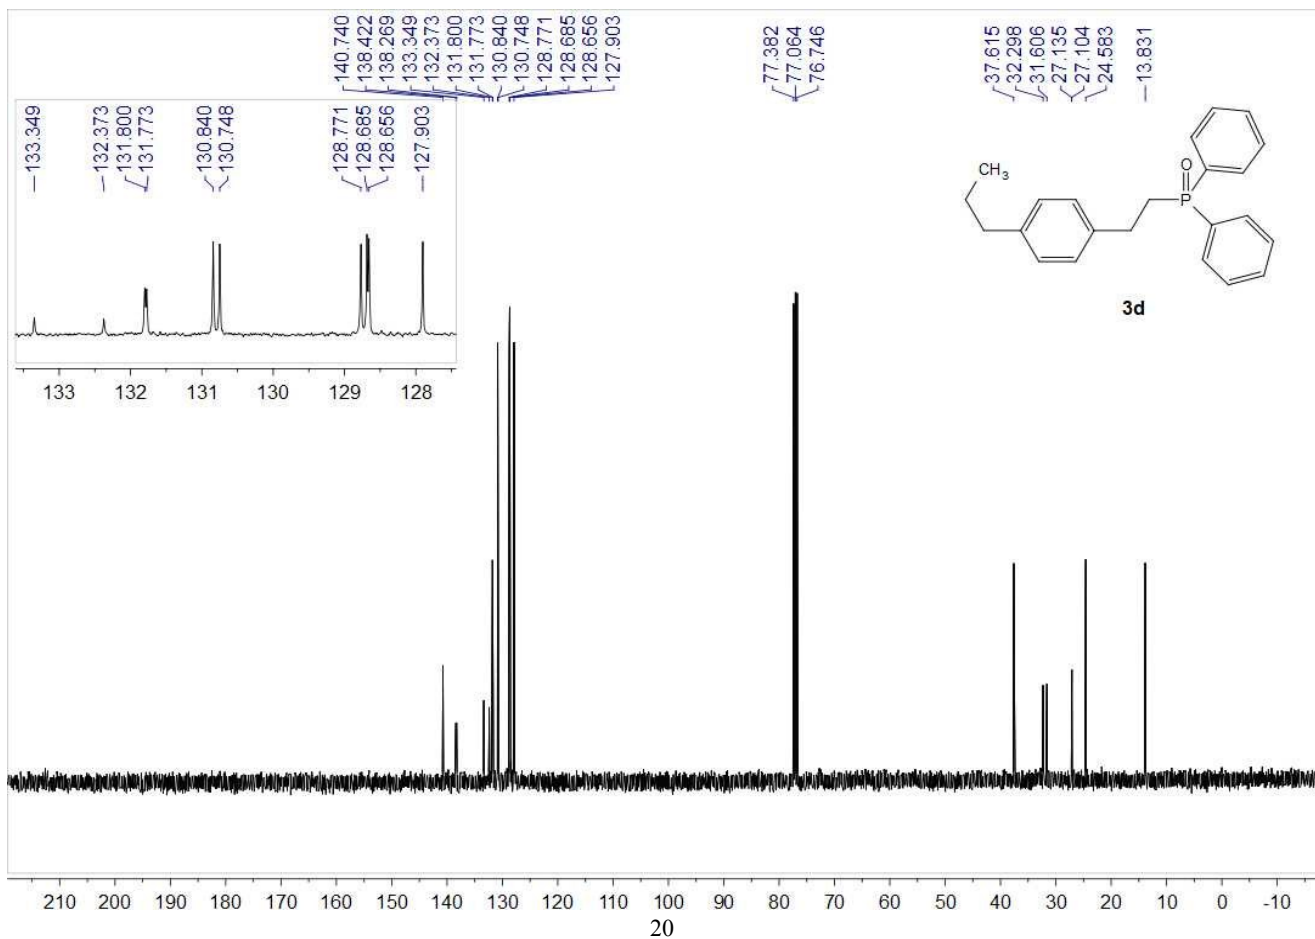

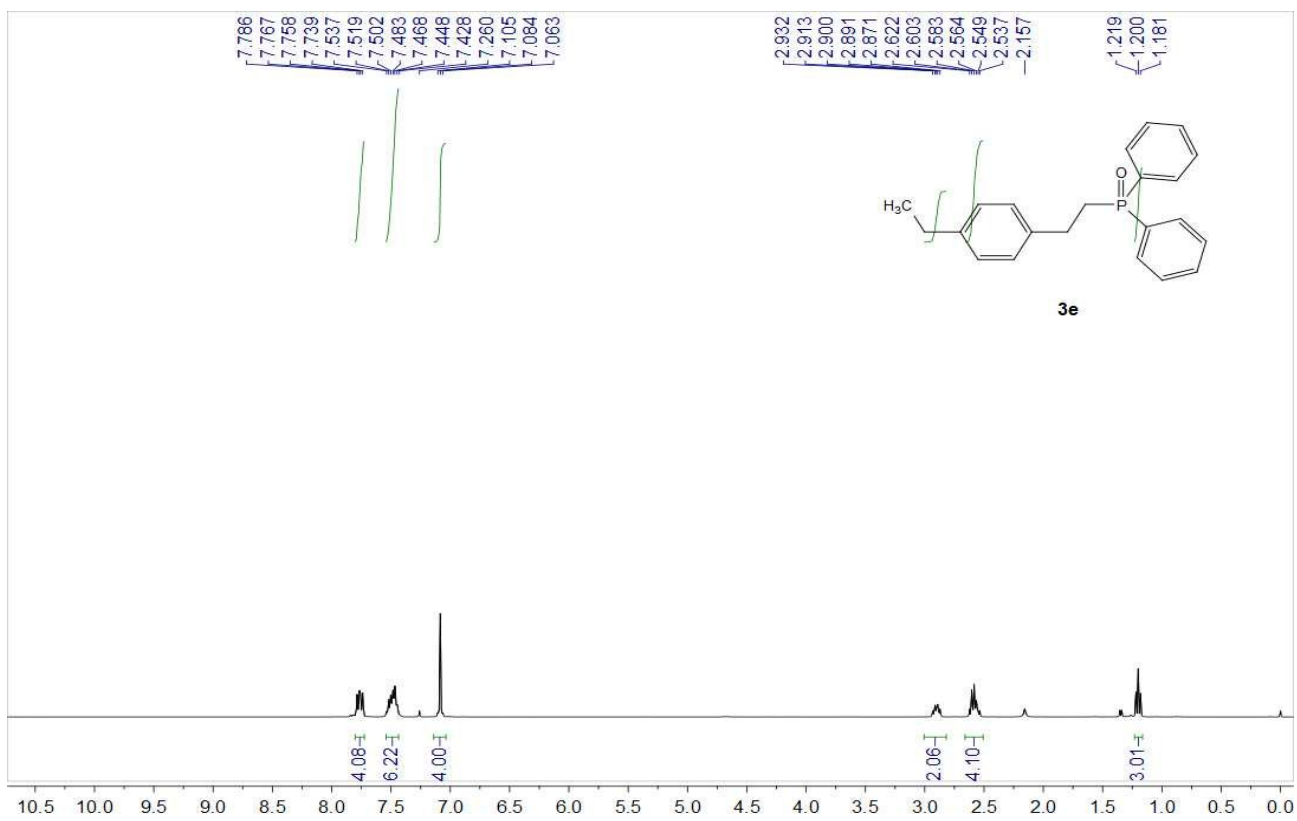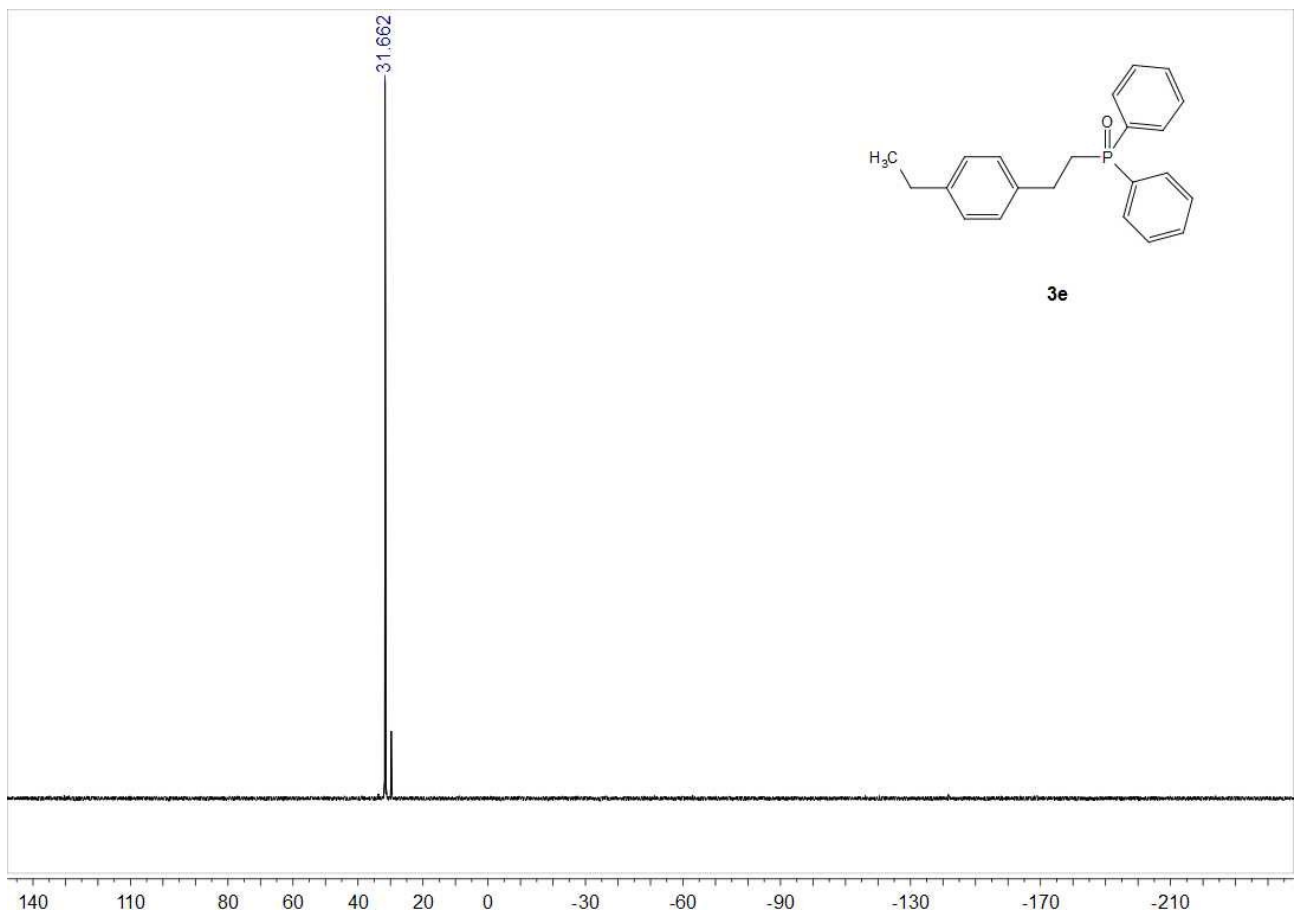

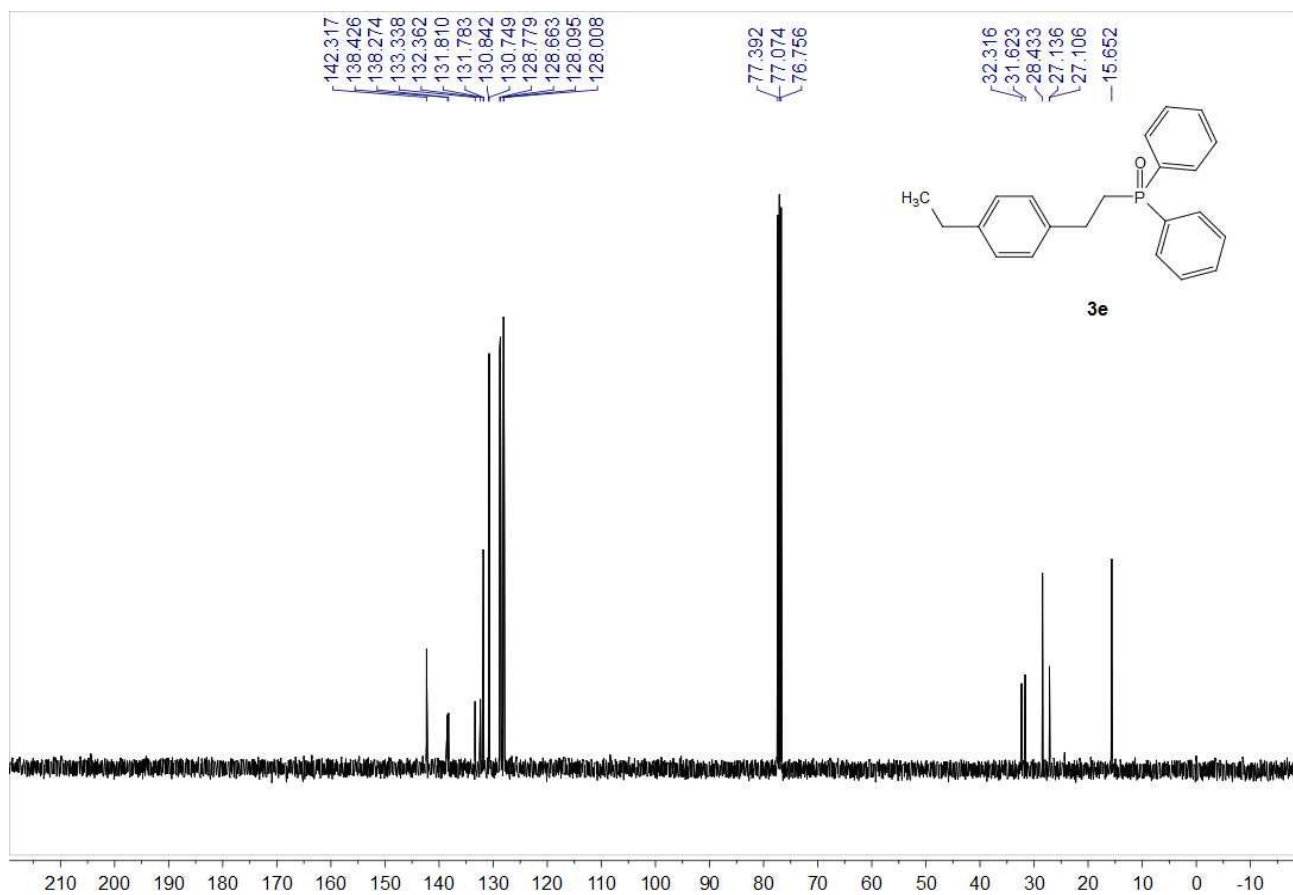

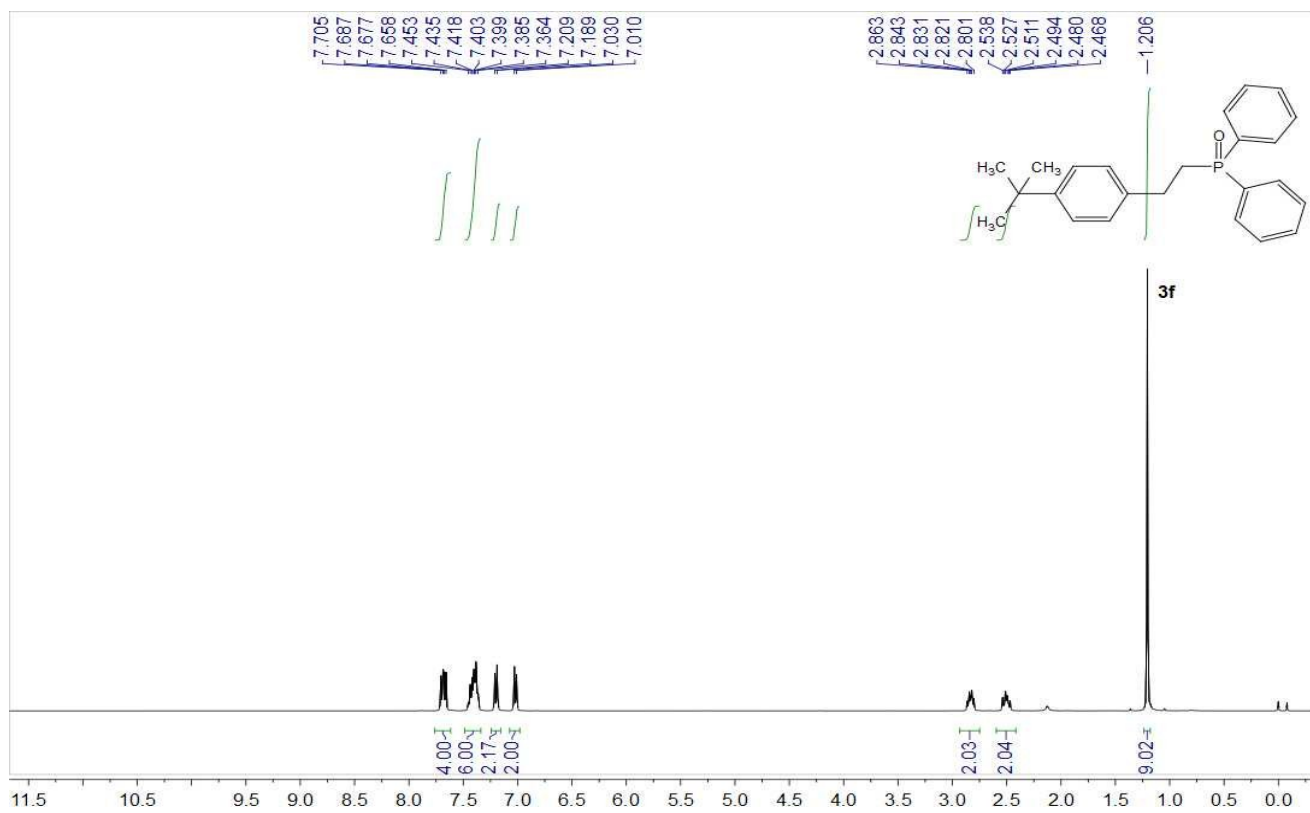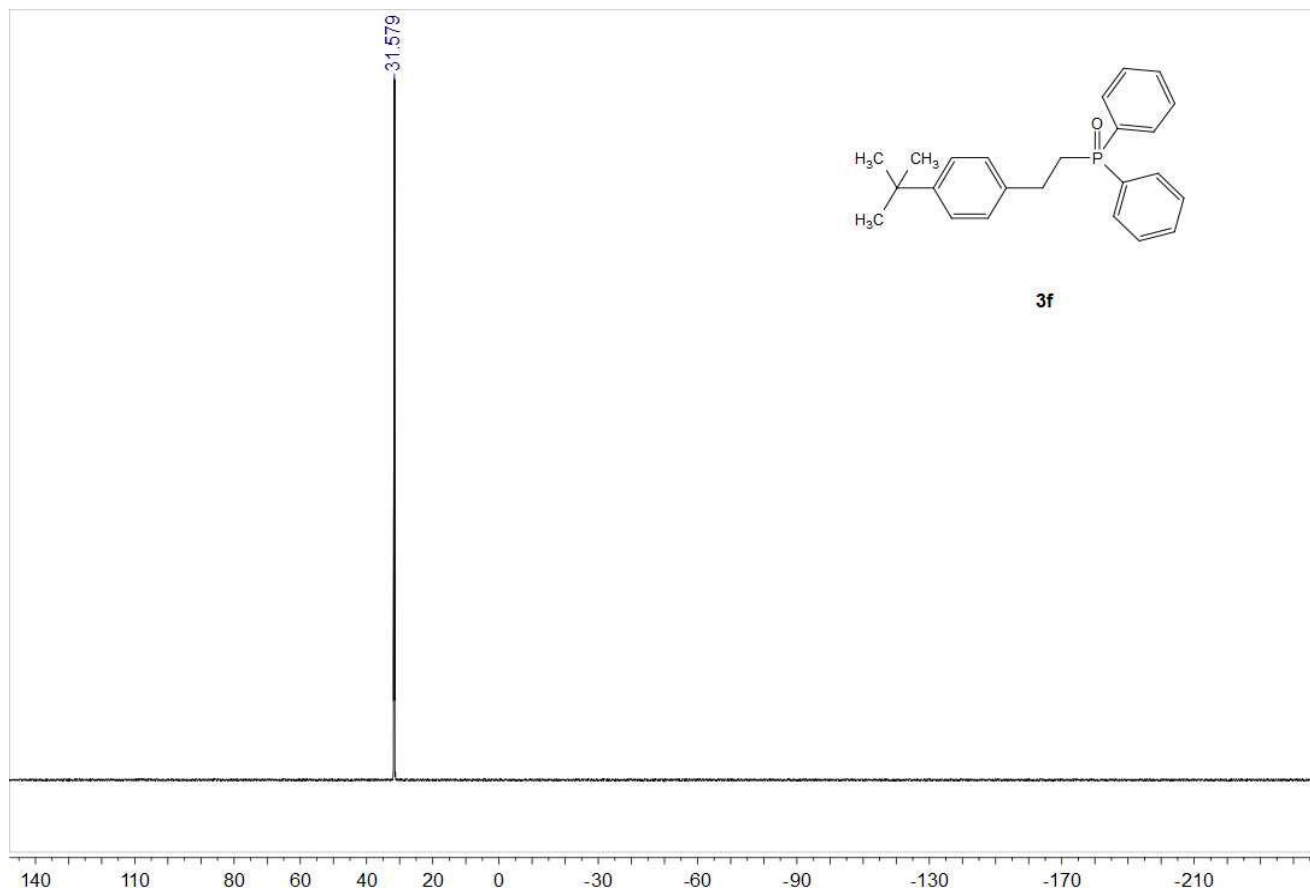

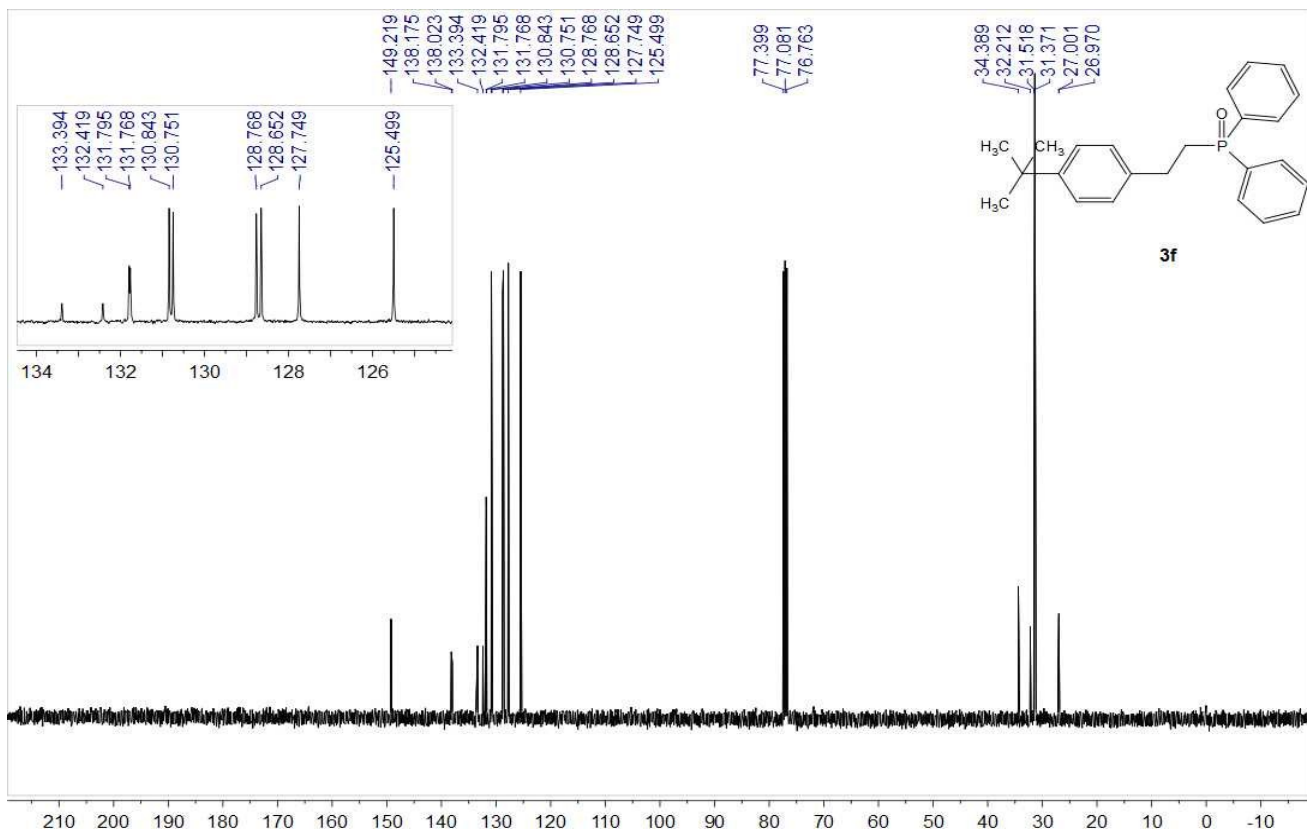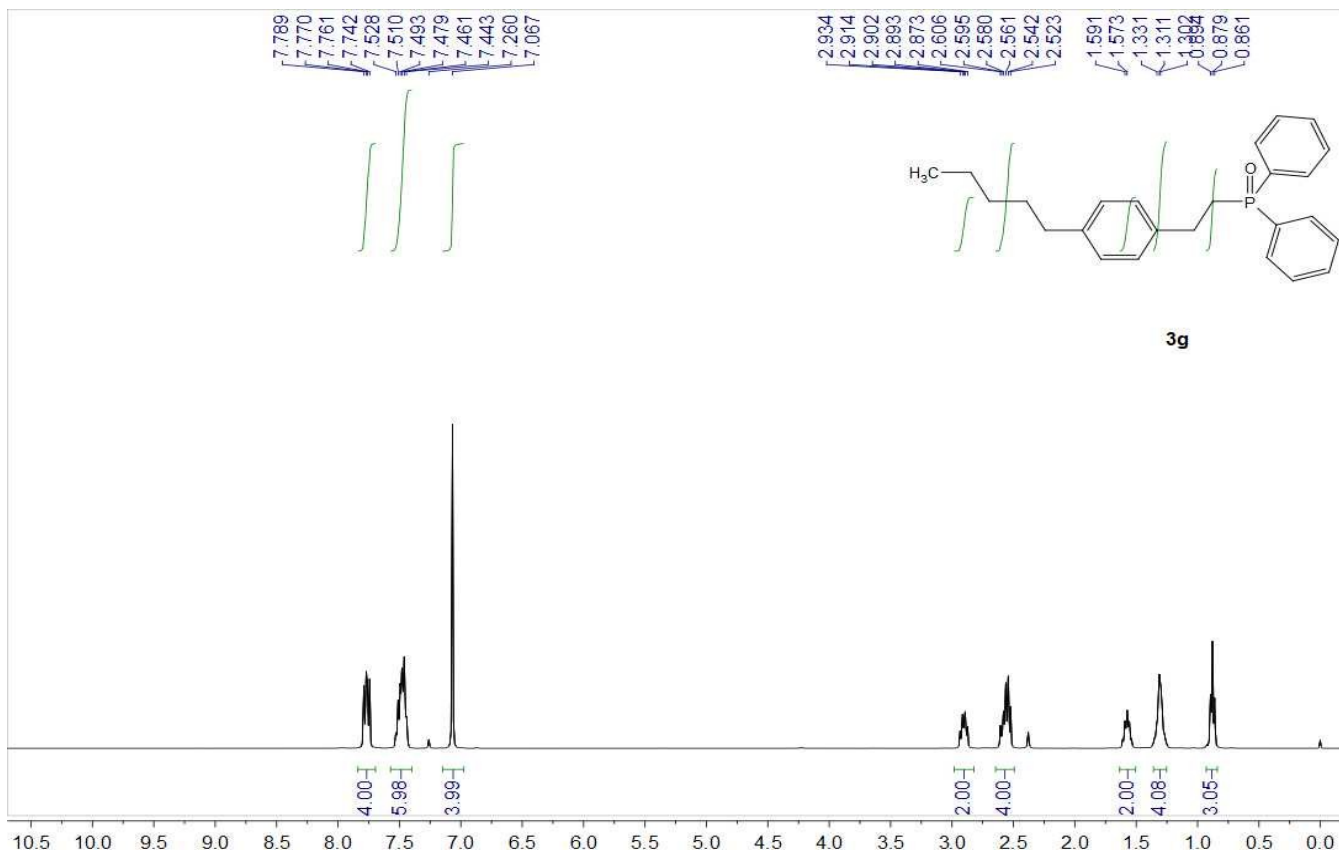



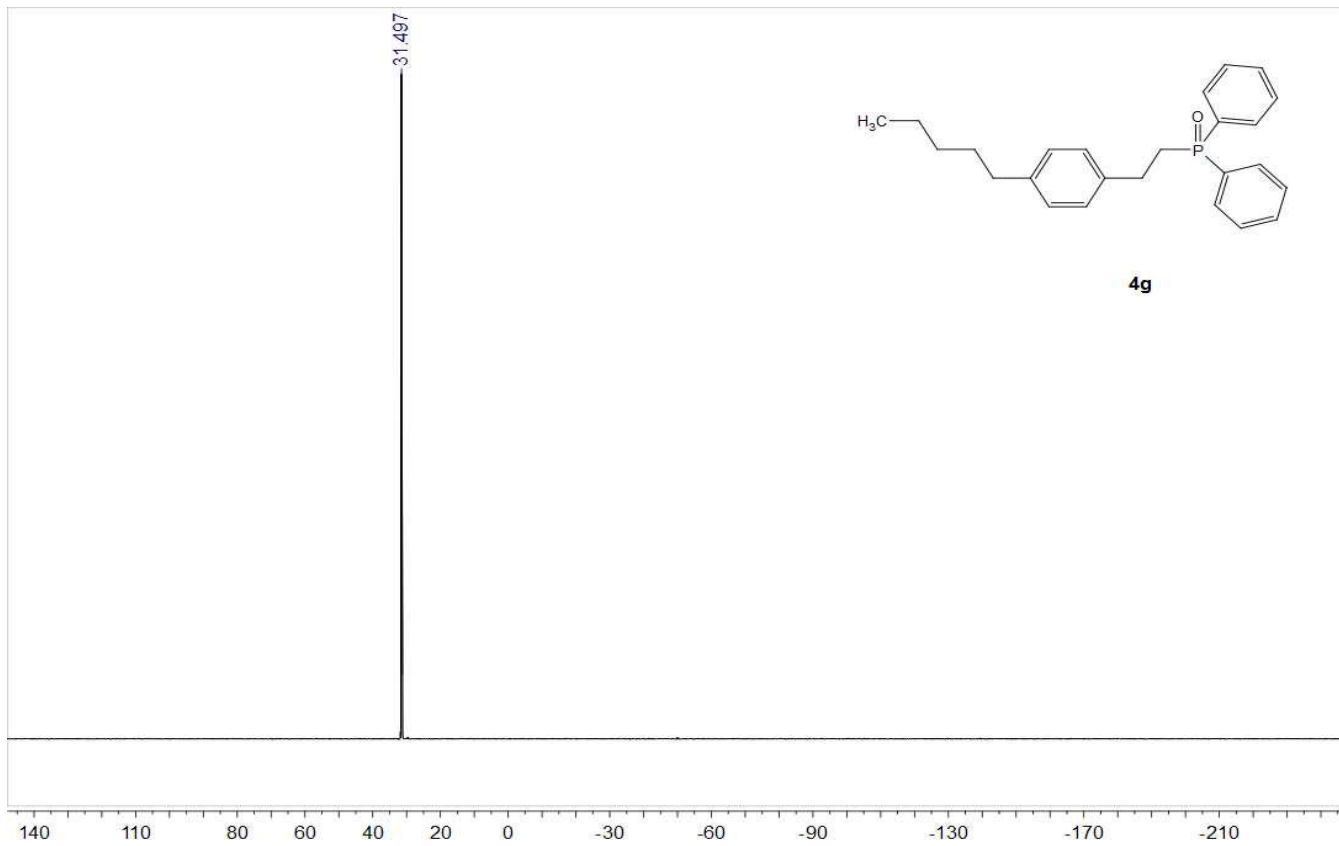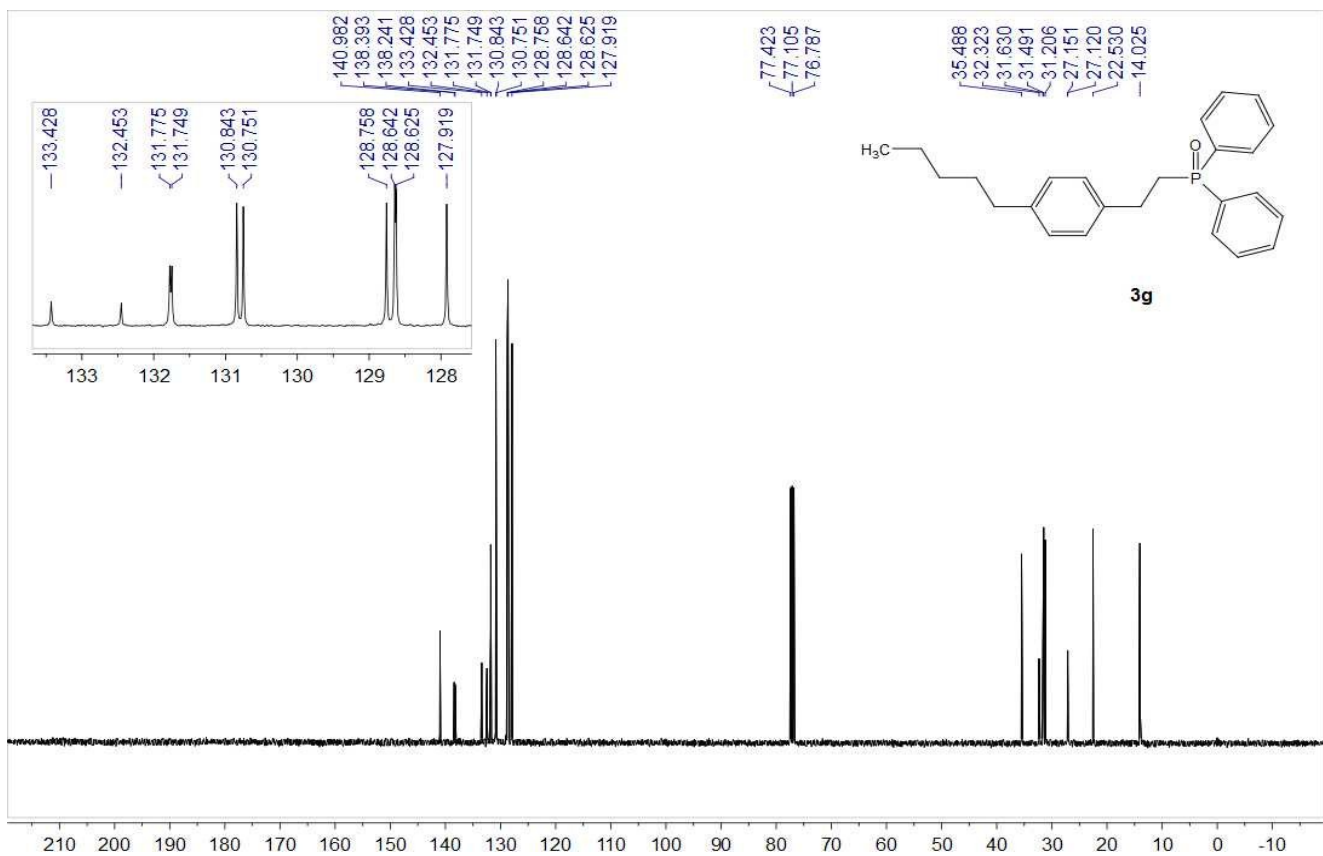

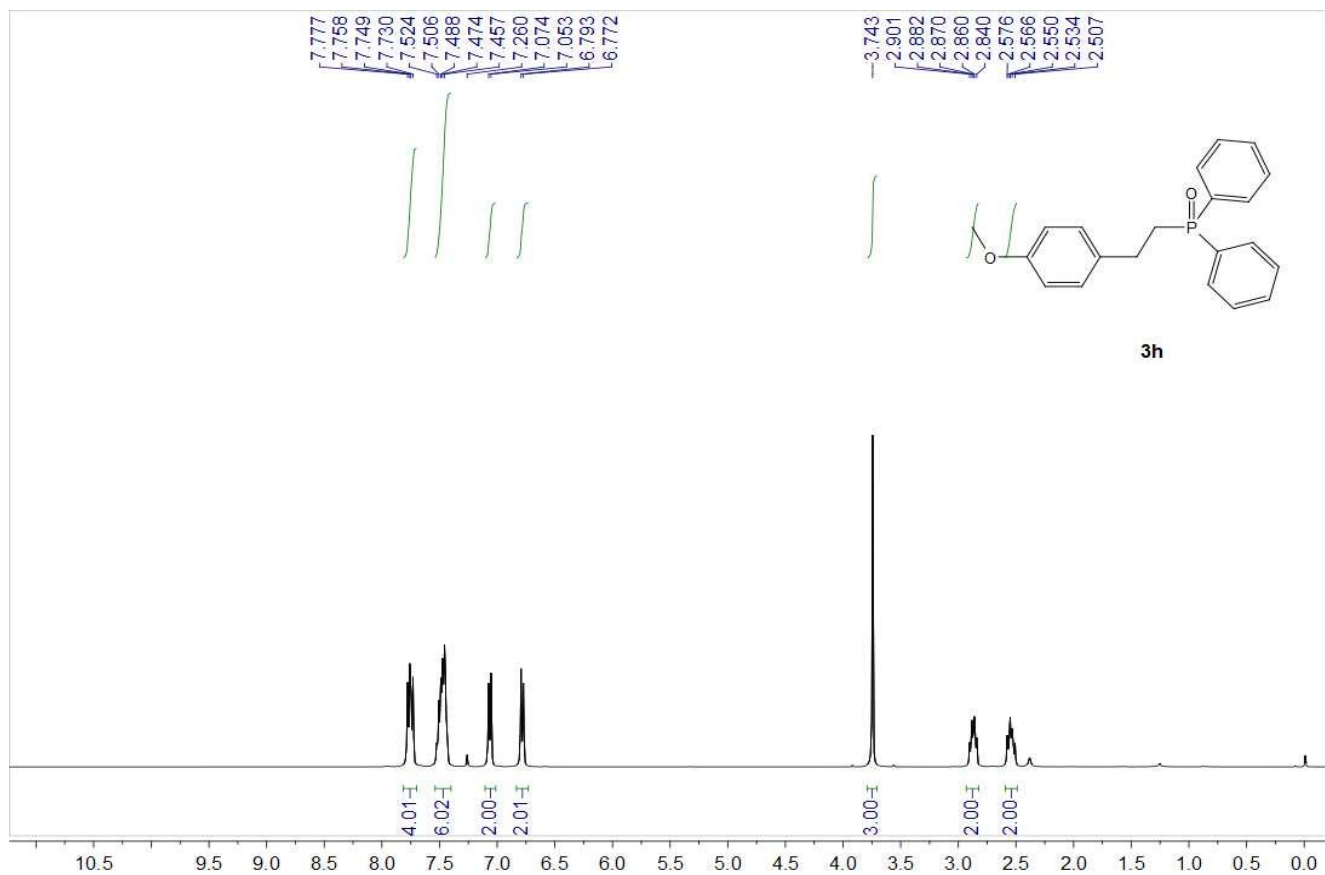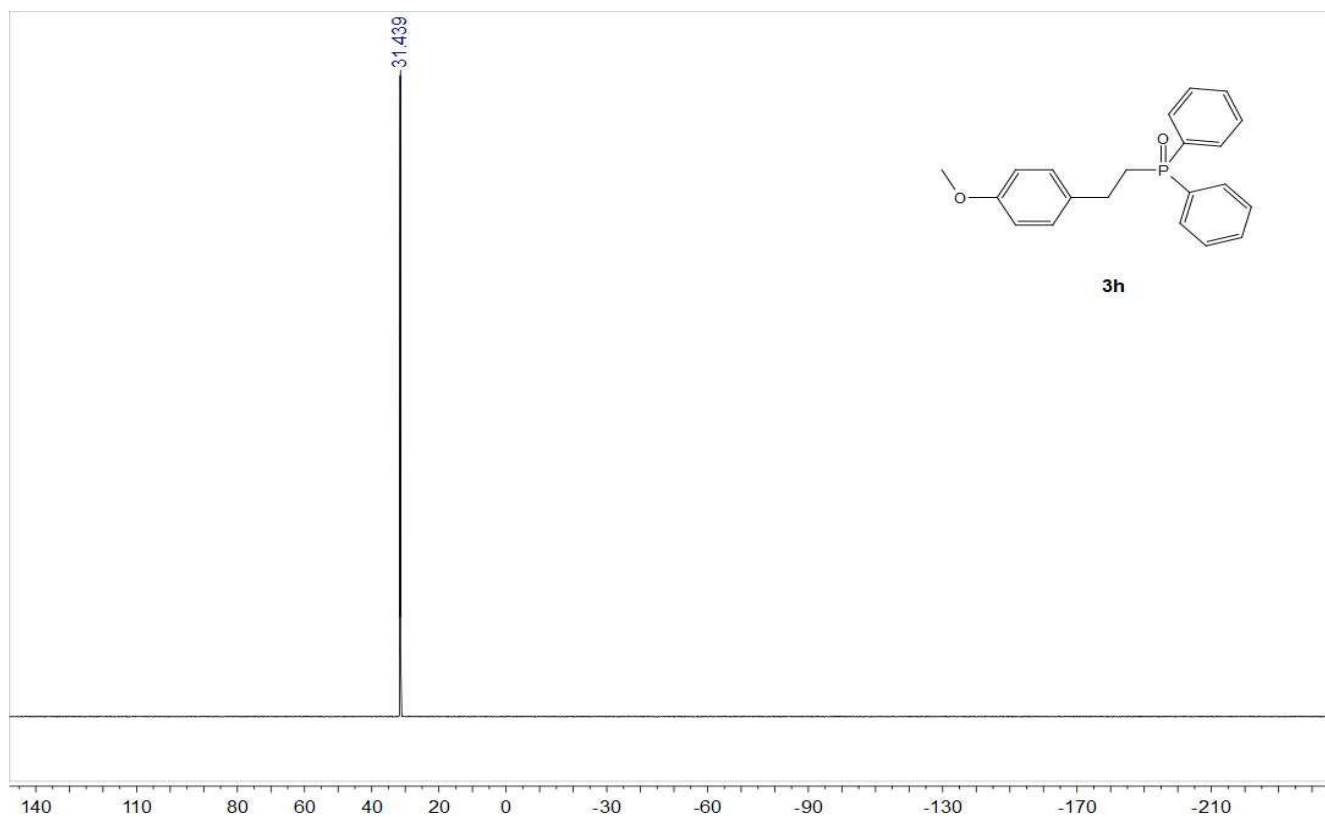

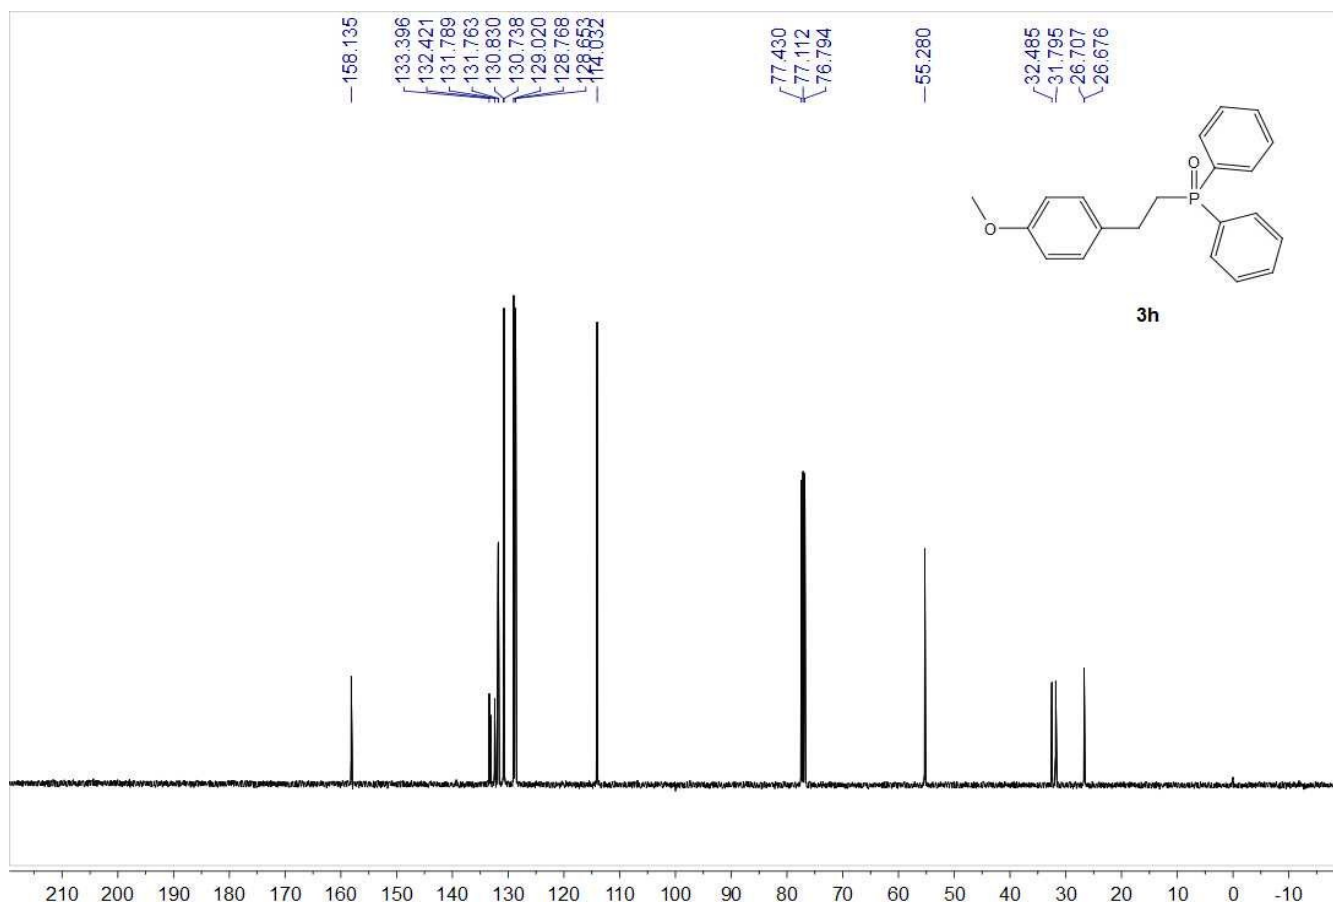

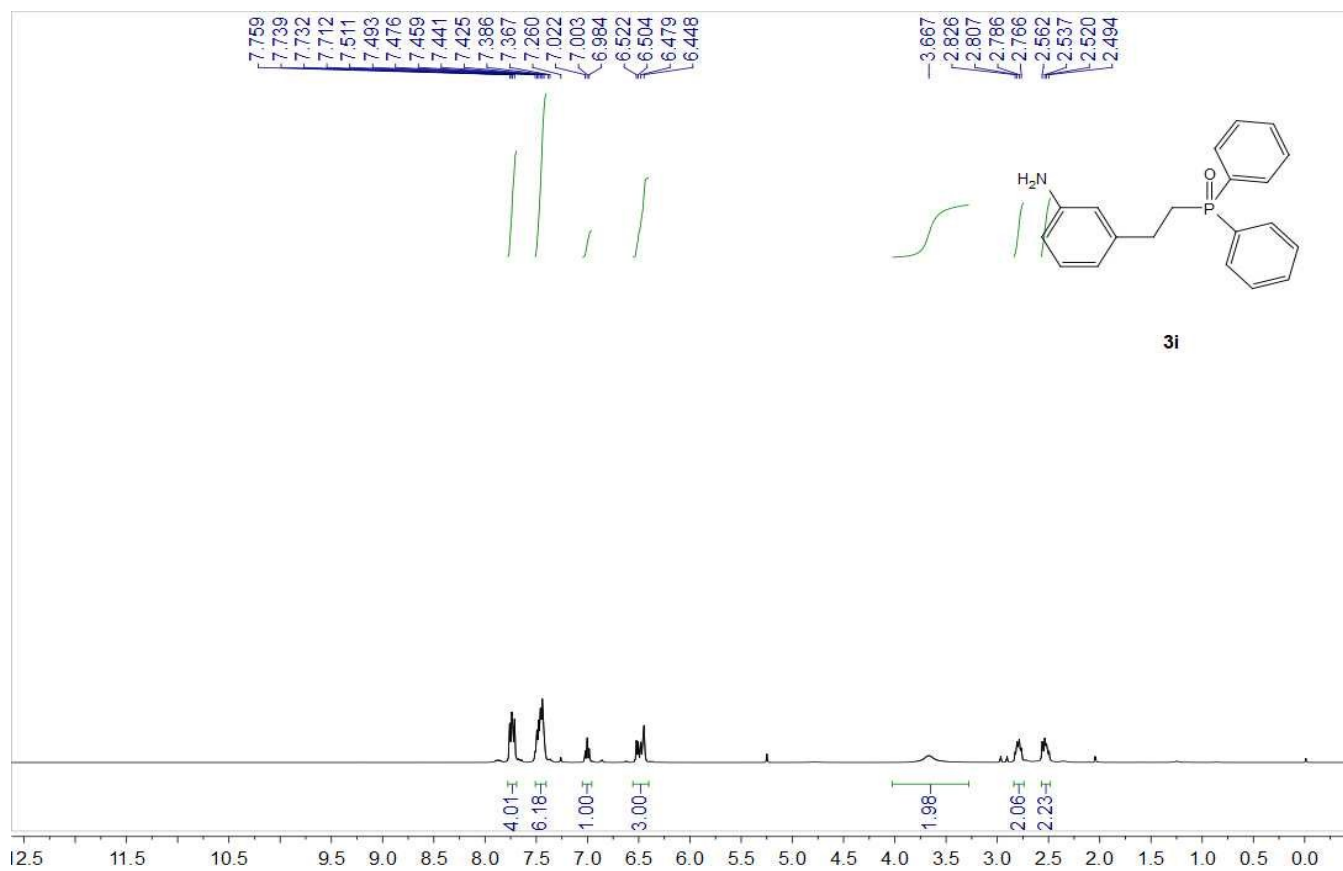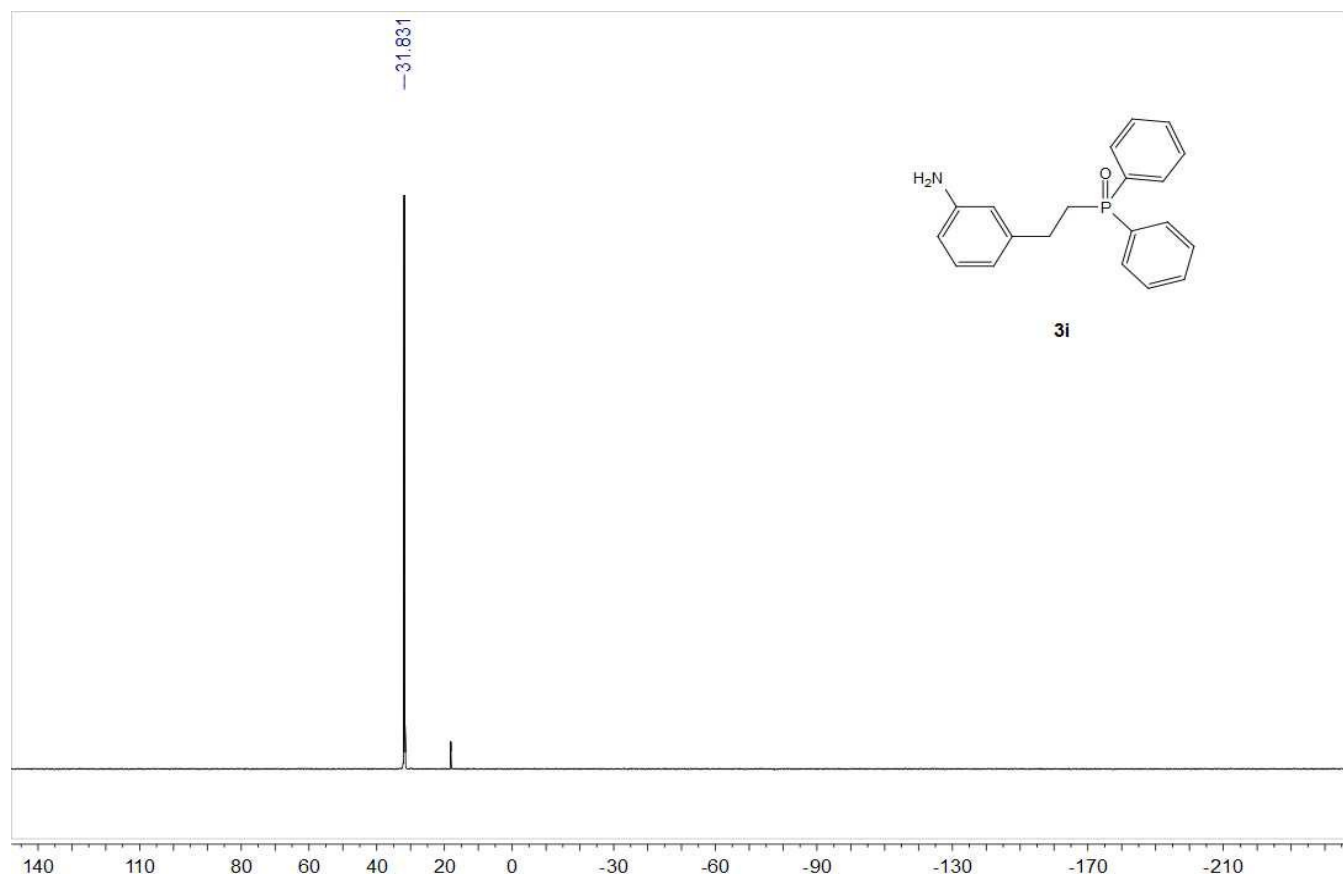

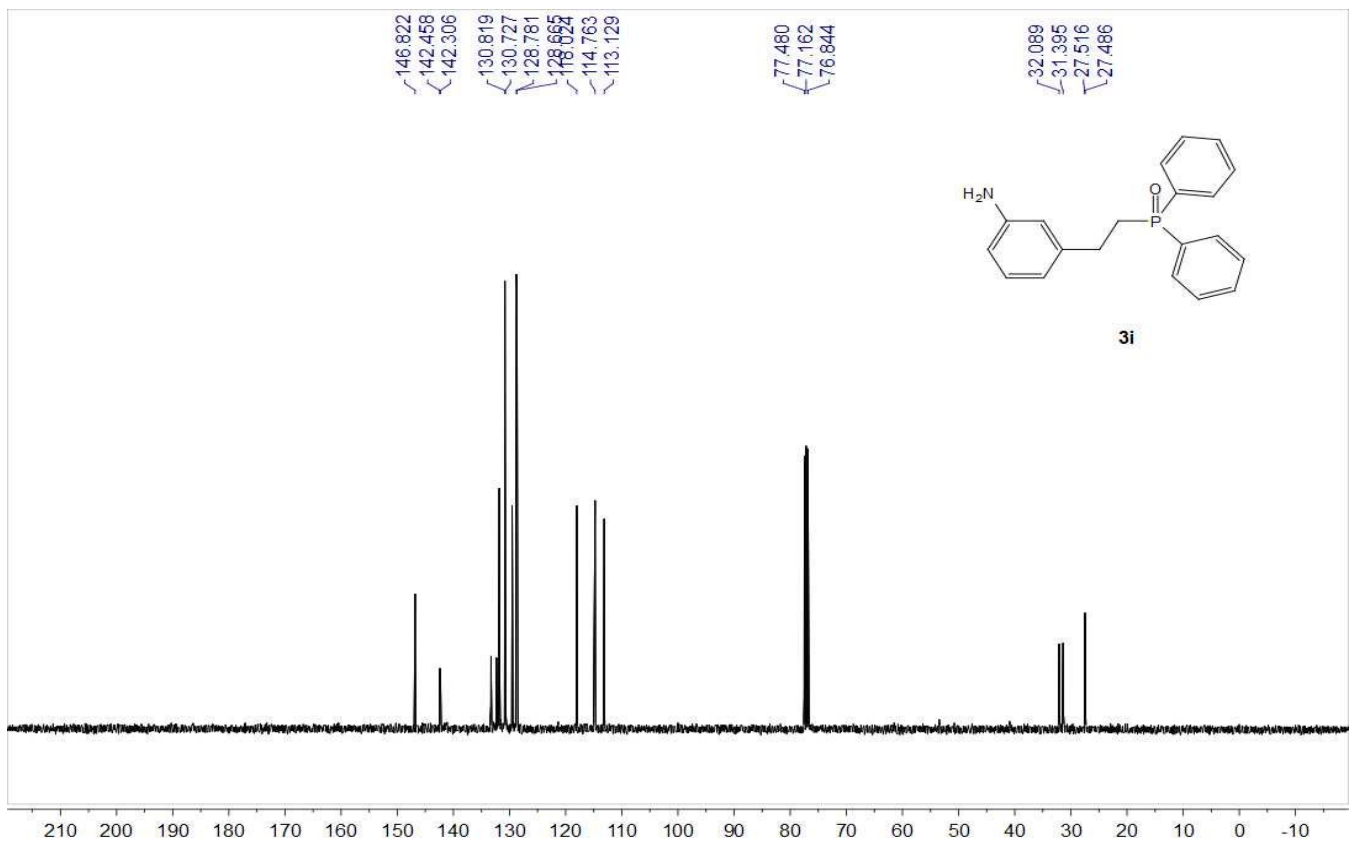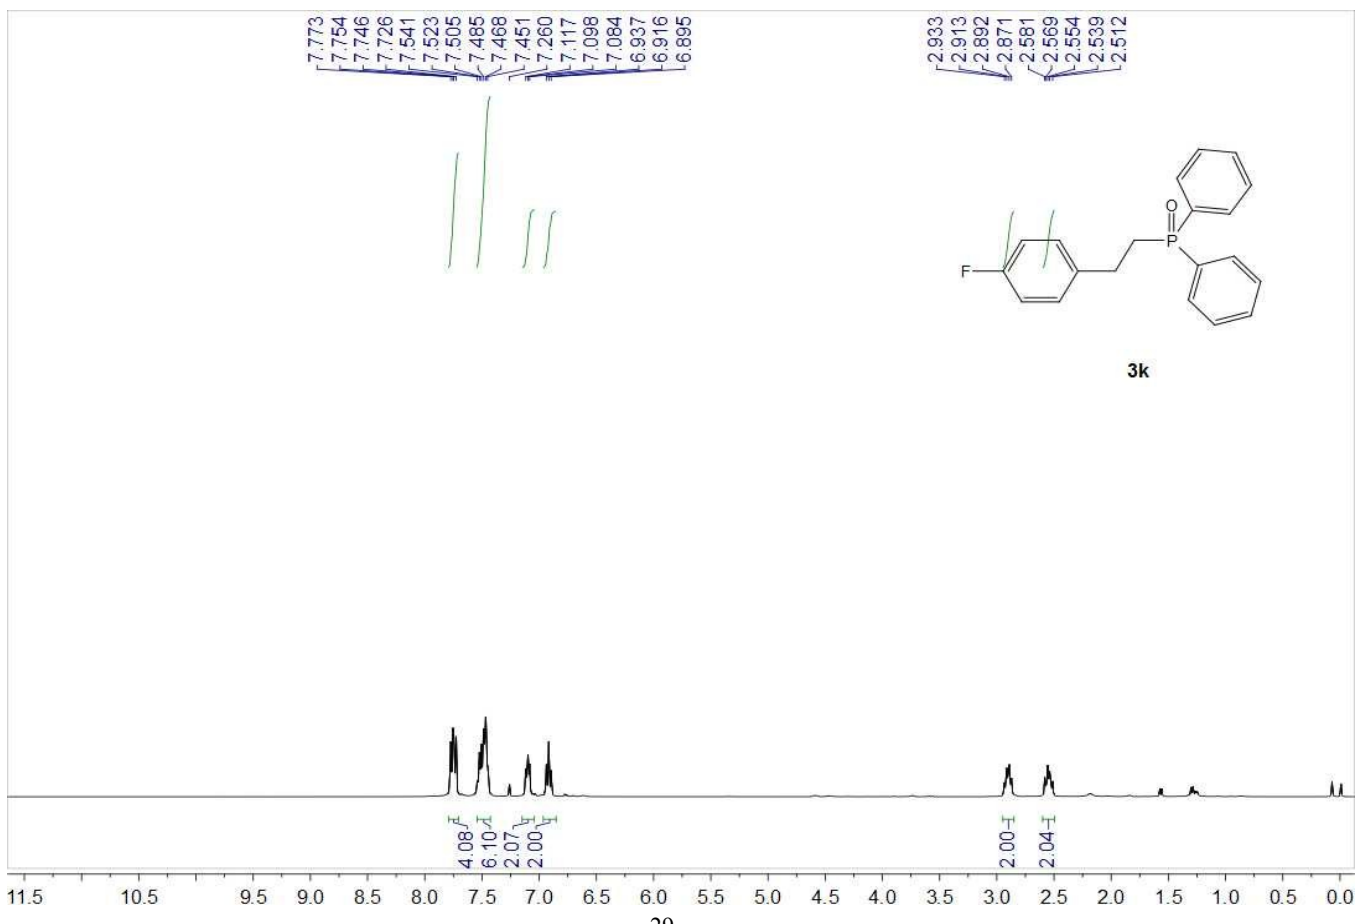

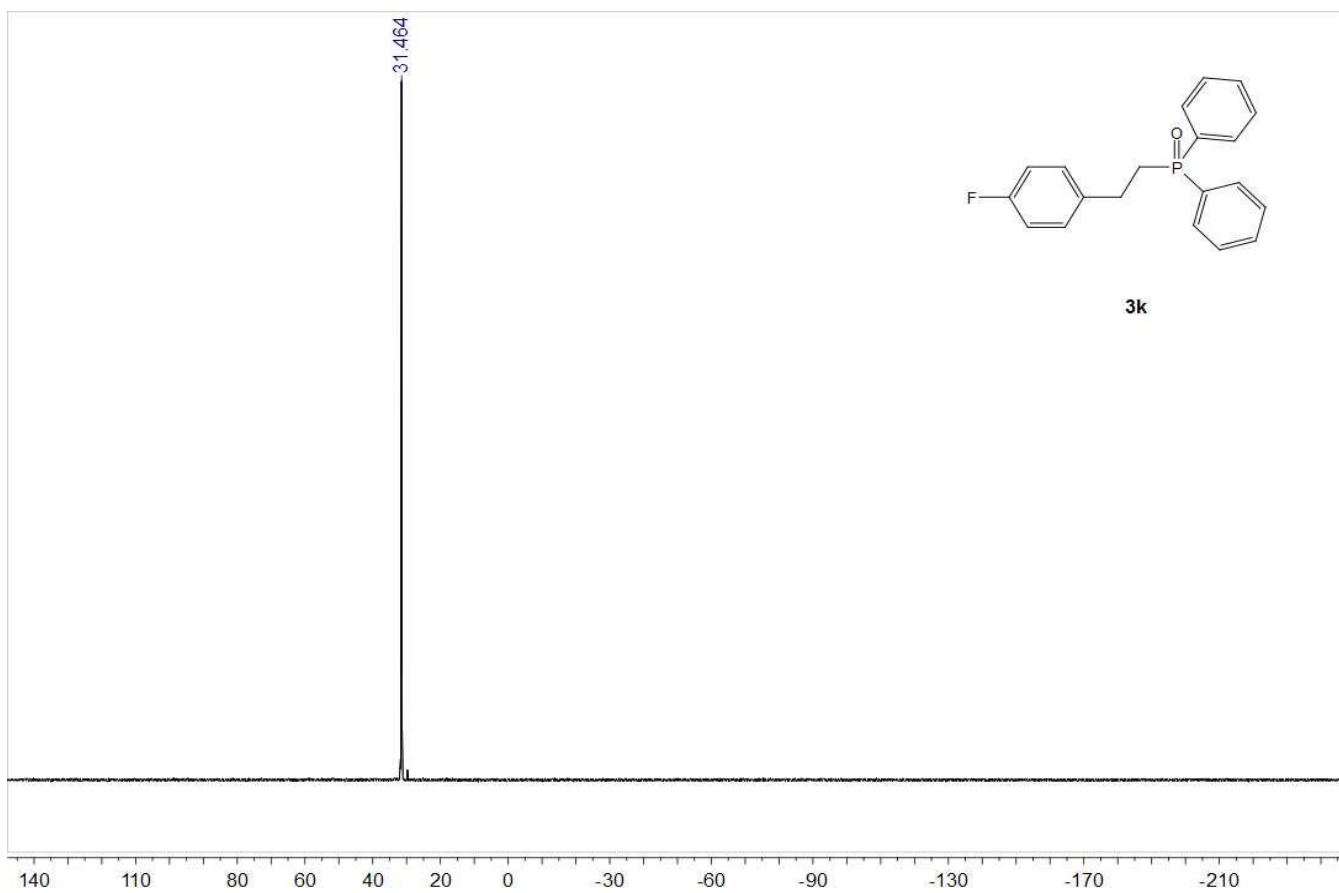

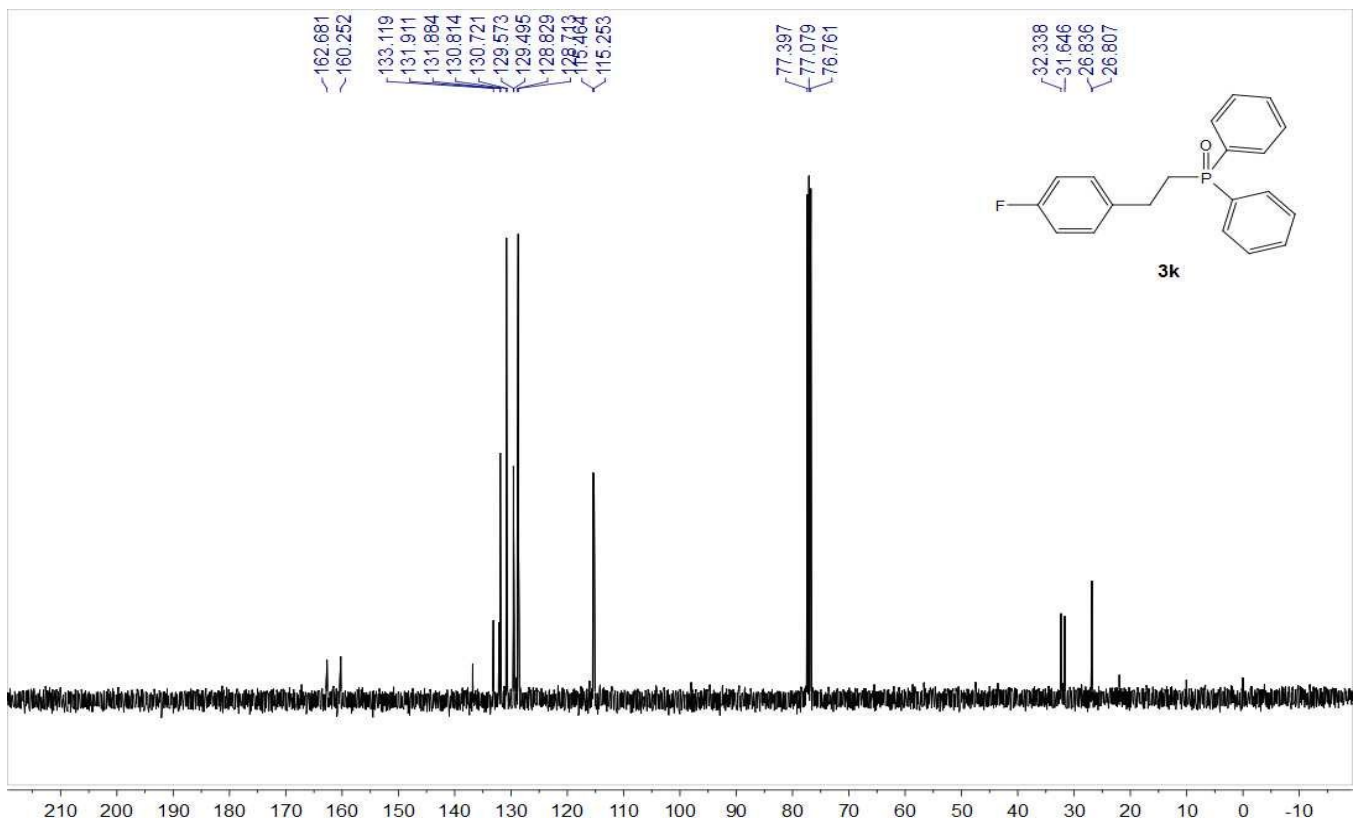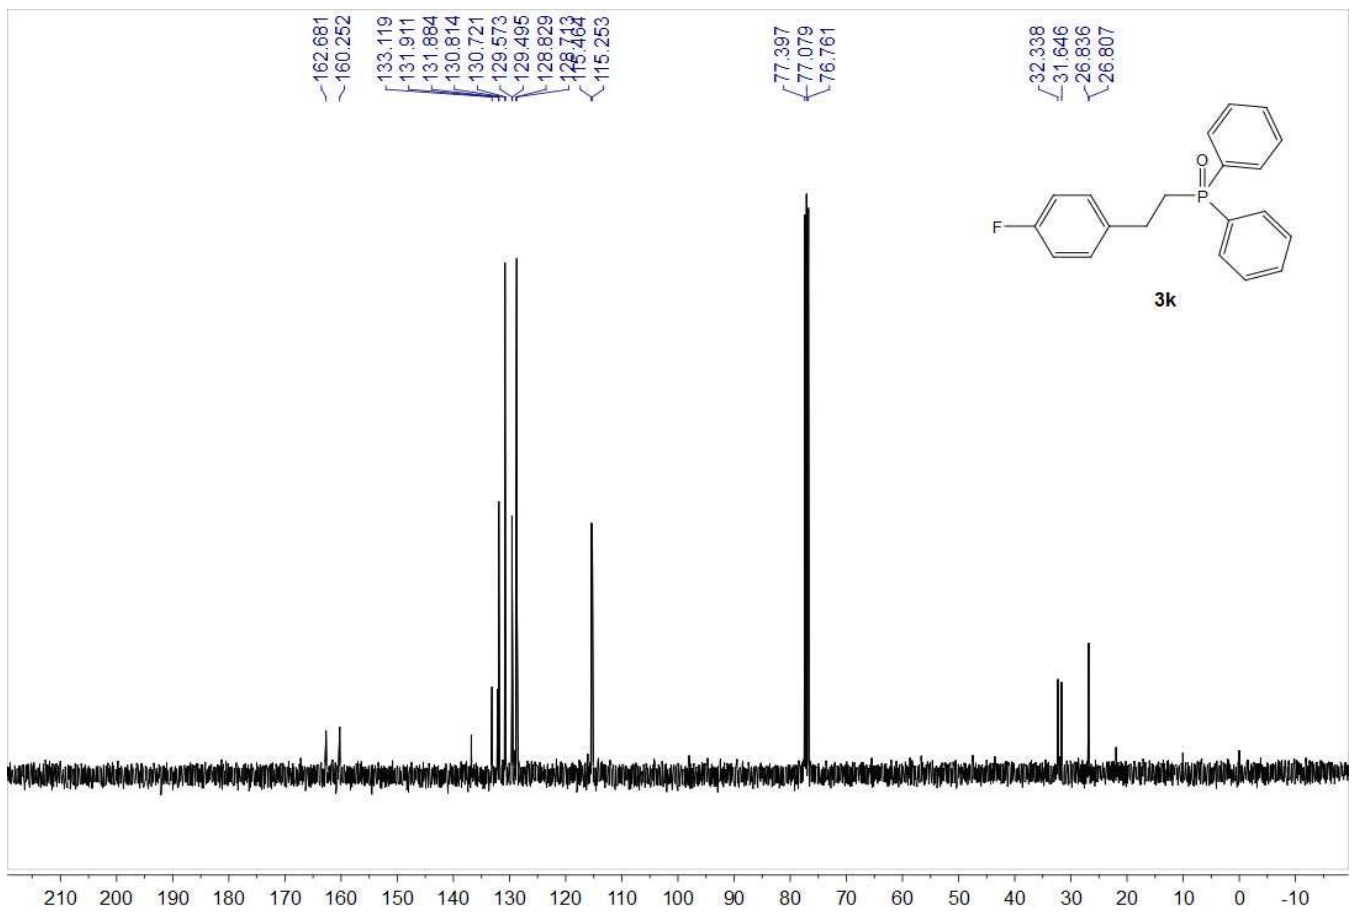

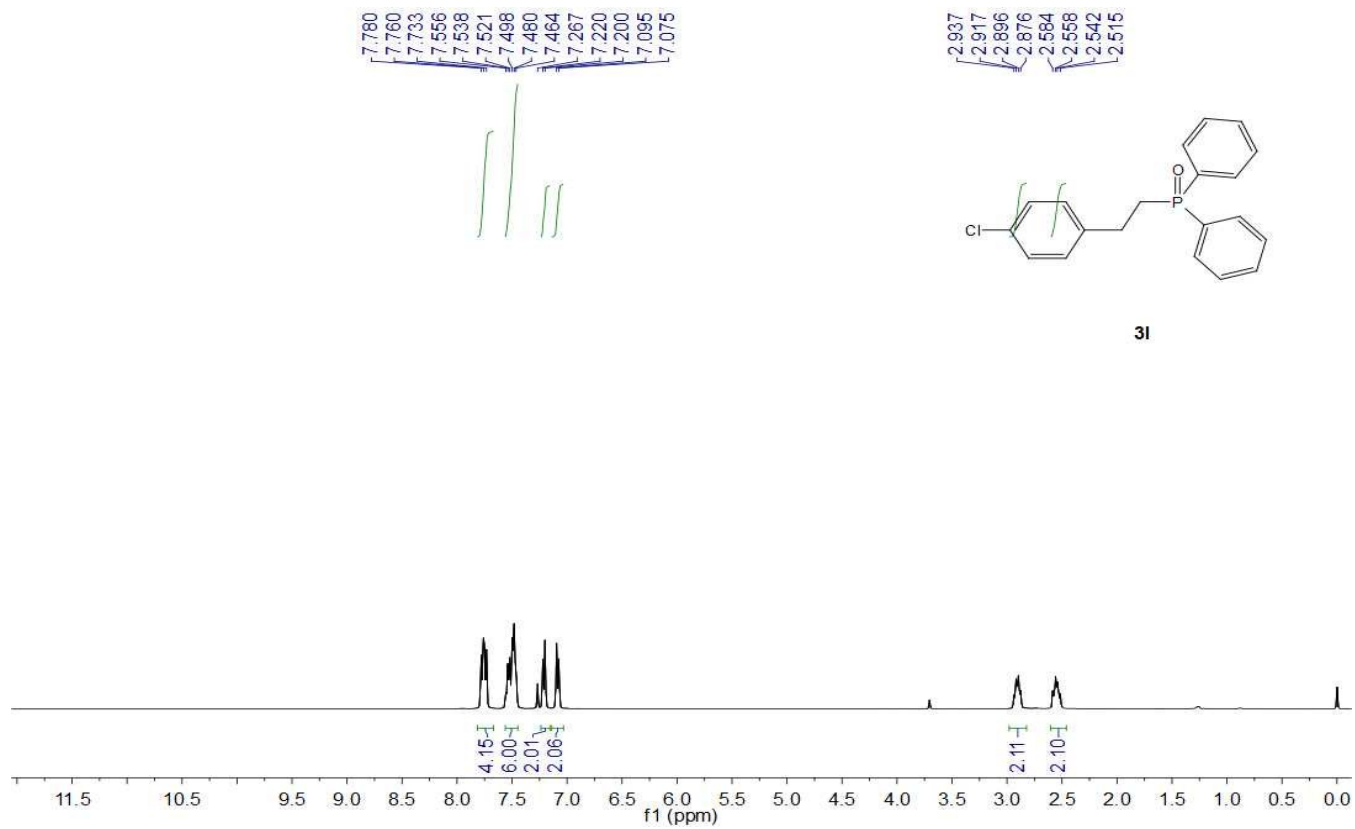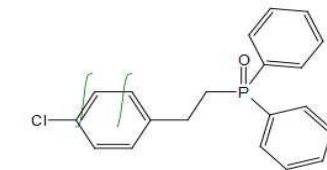

**31**

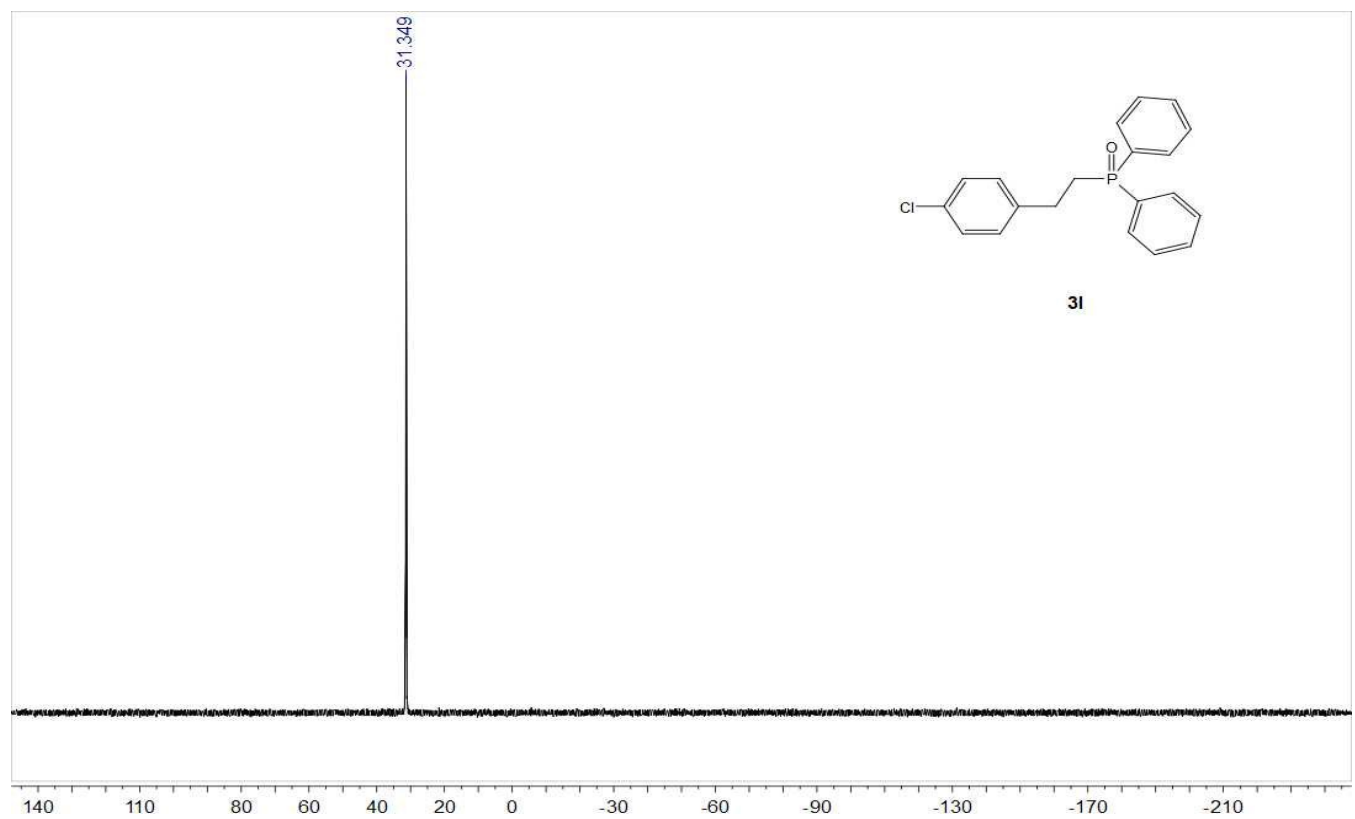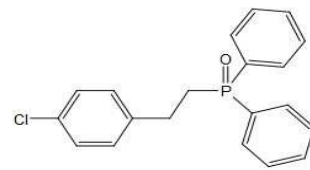

**31**



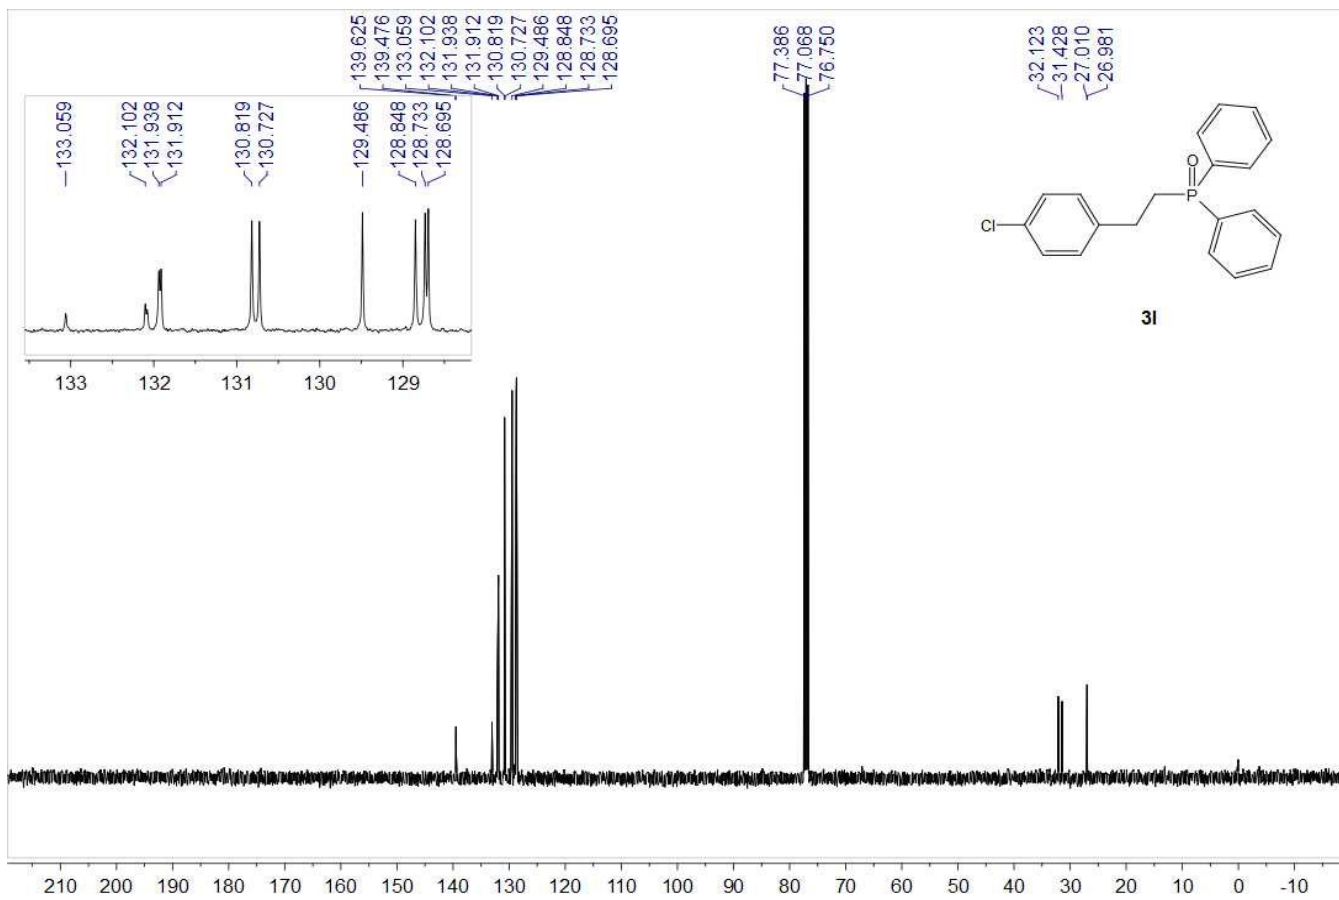

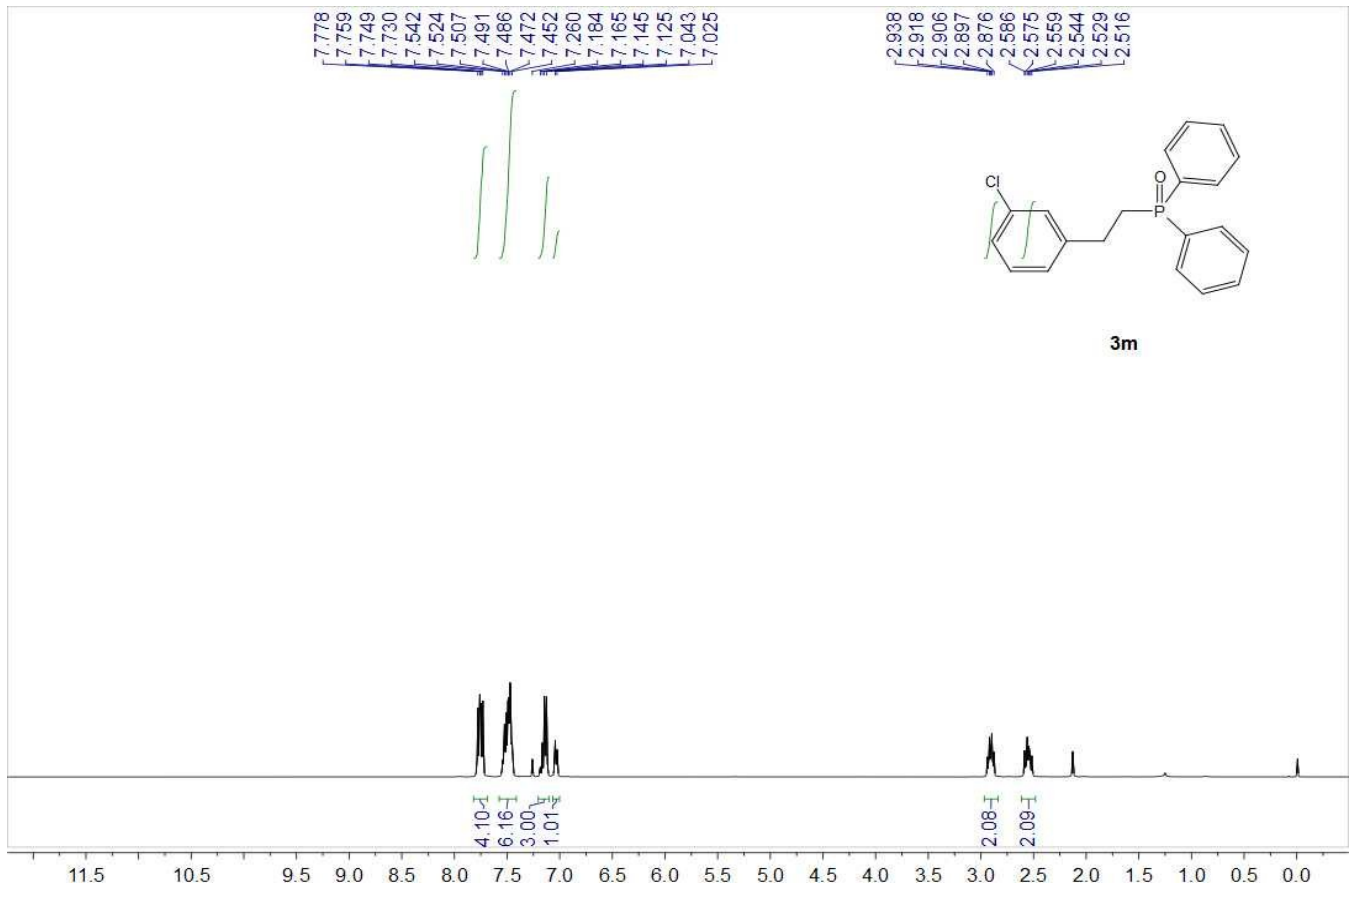

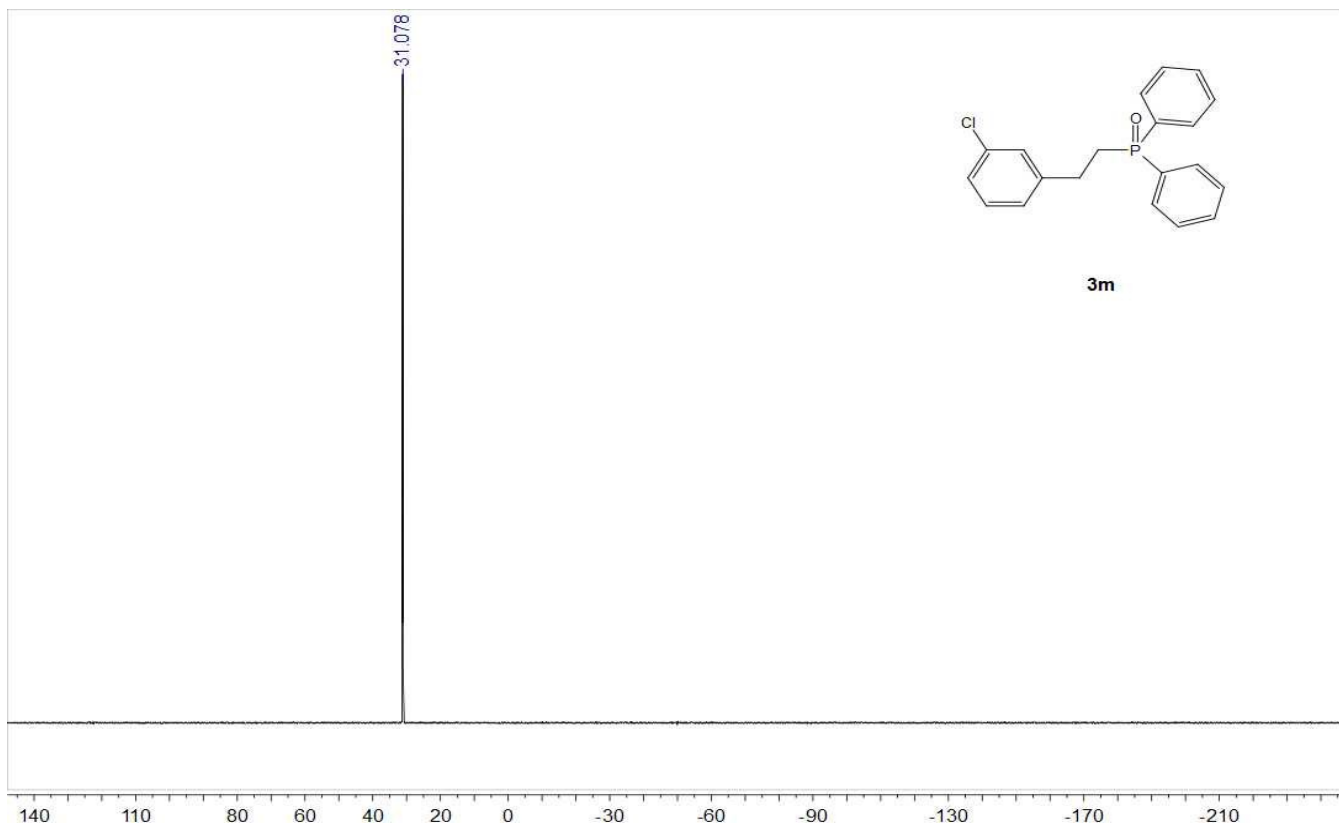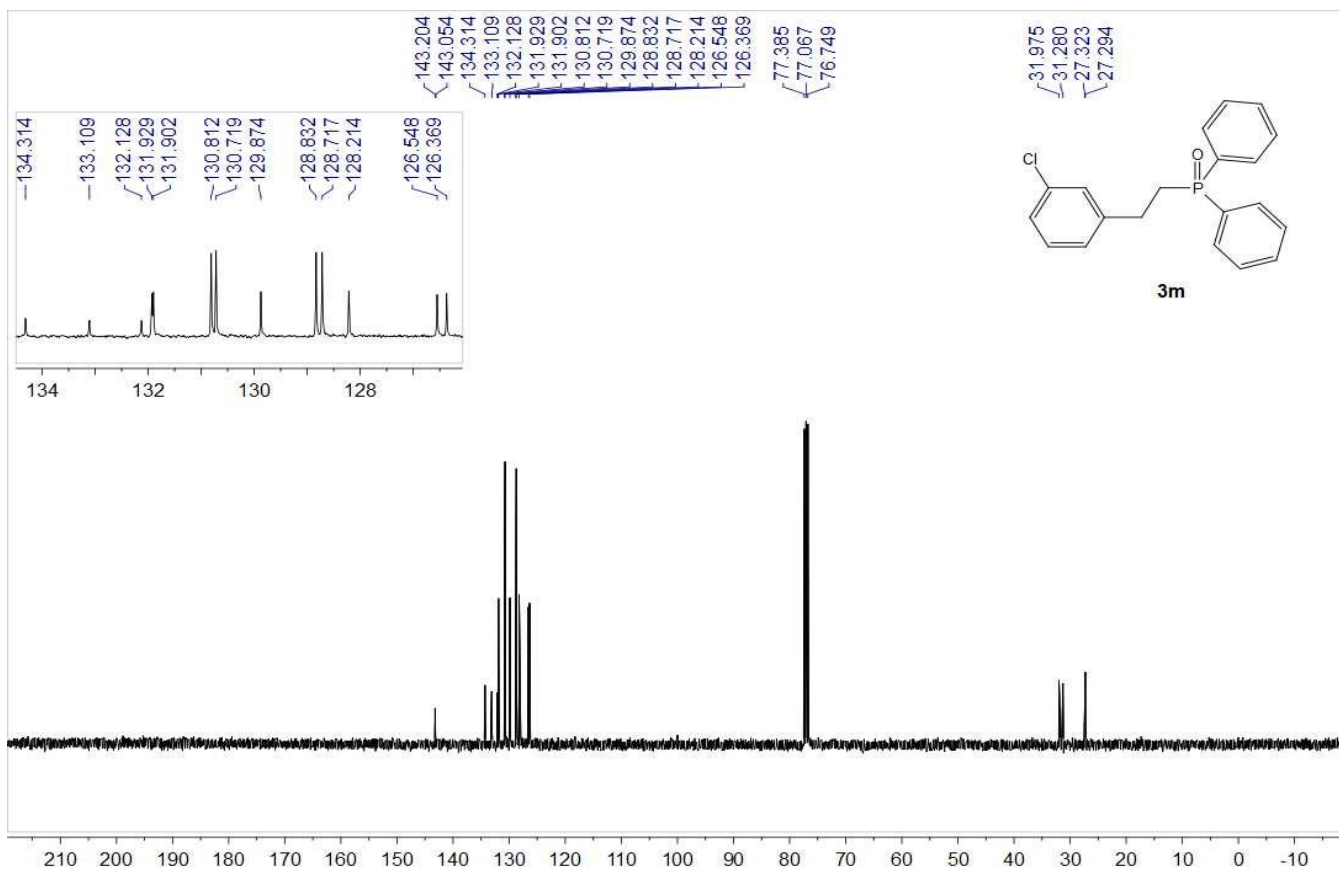

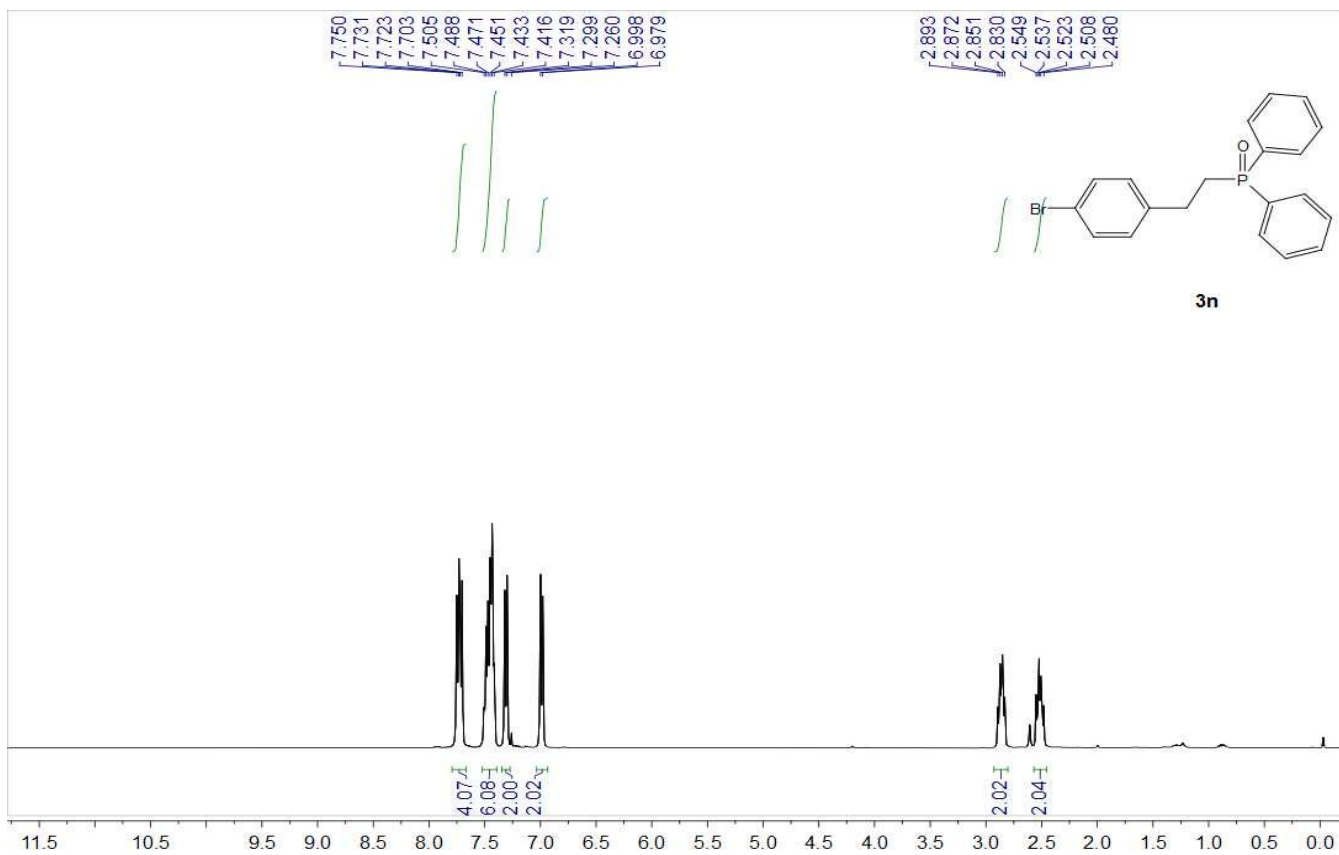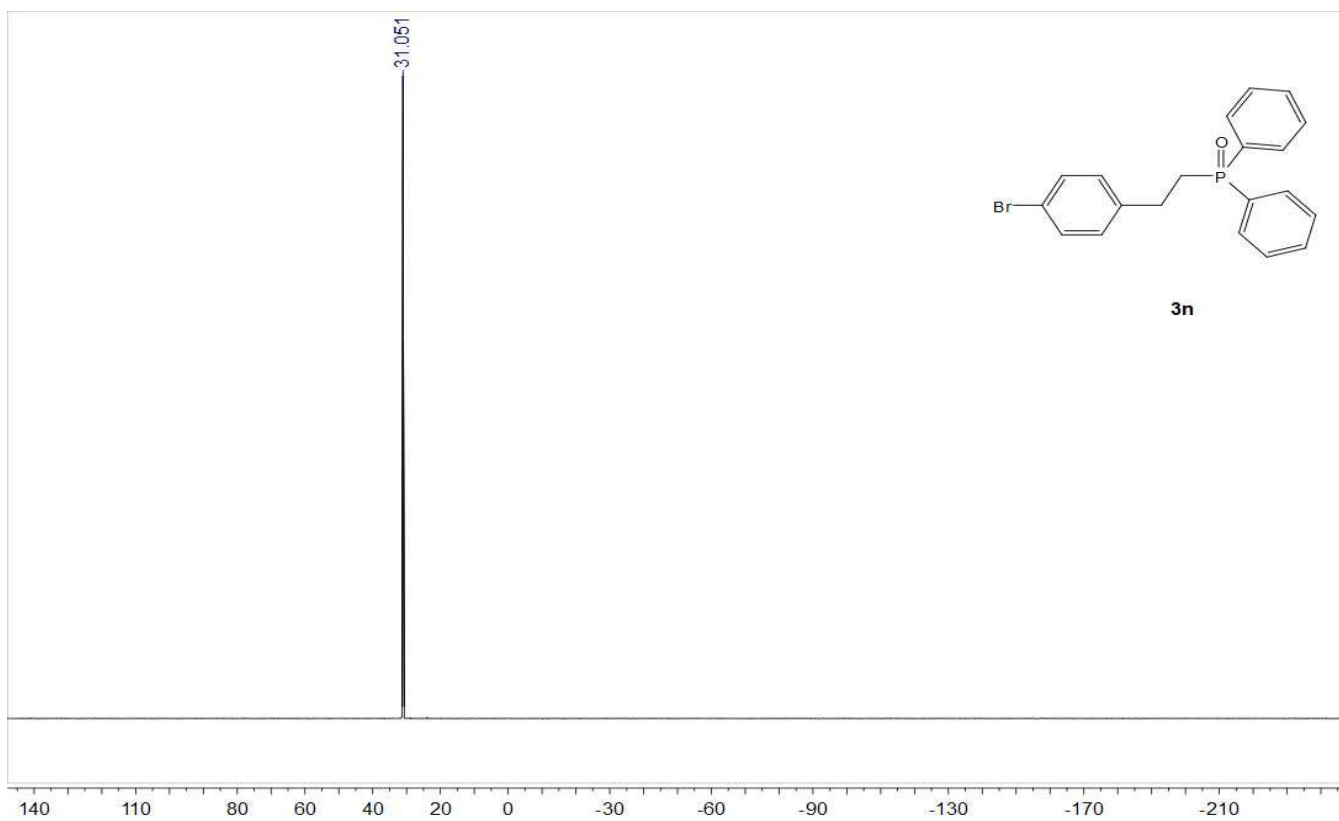

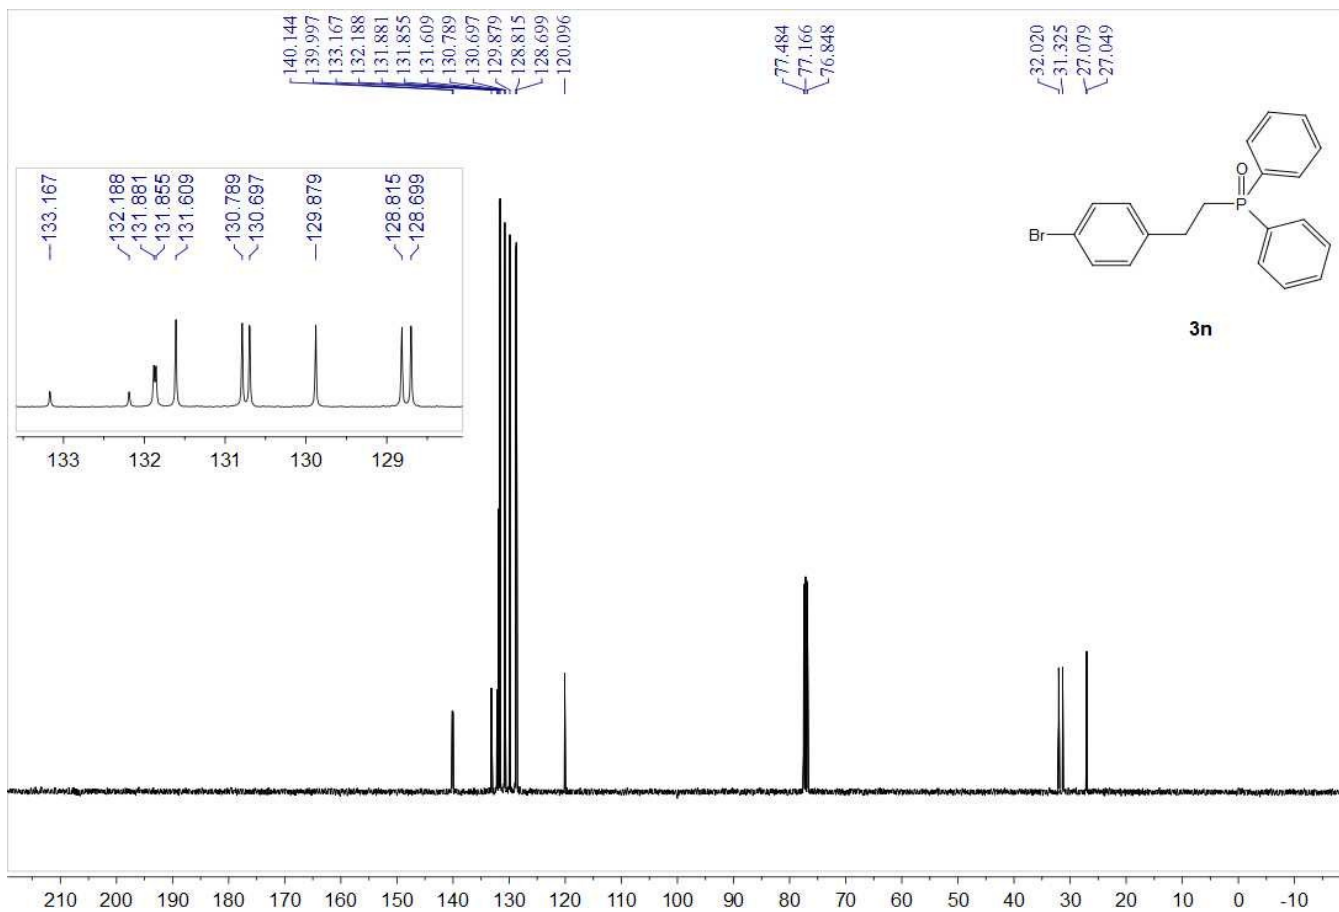

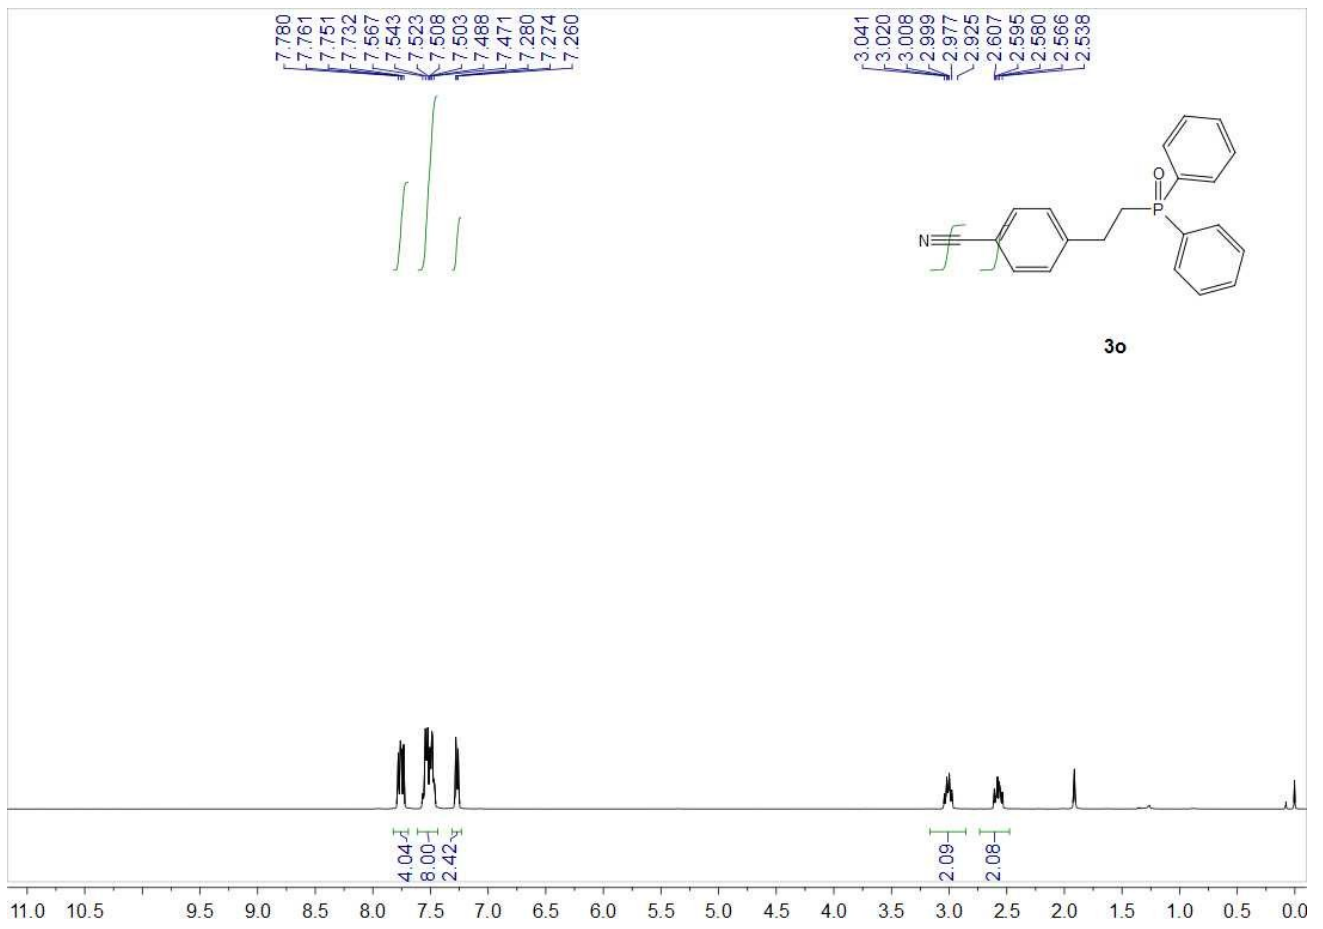

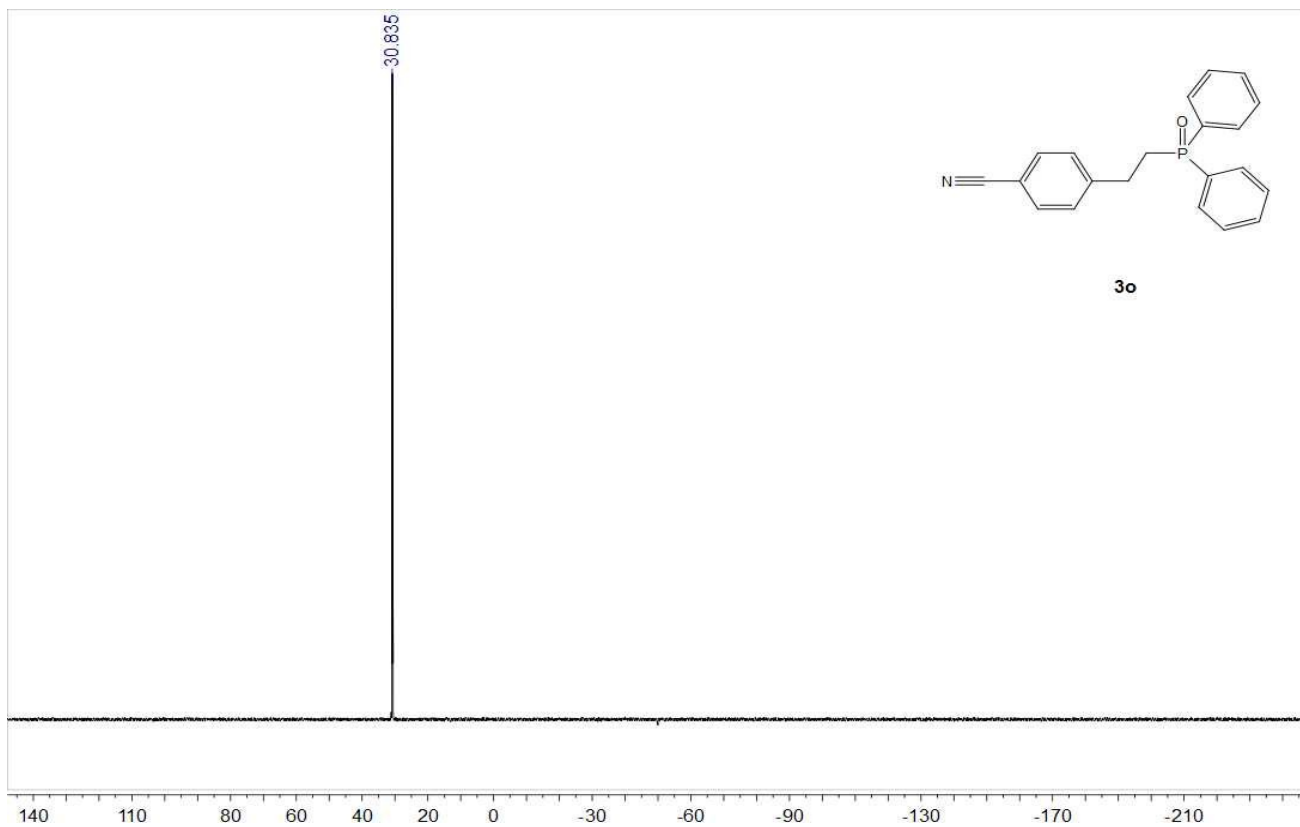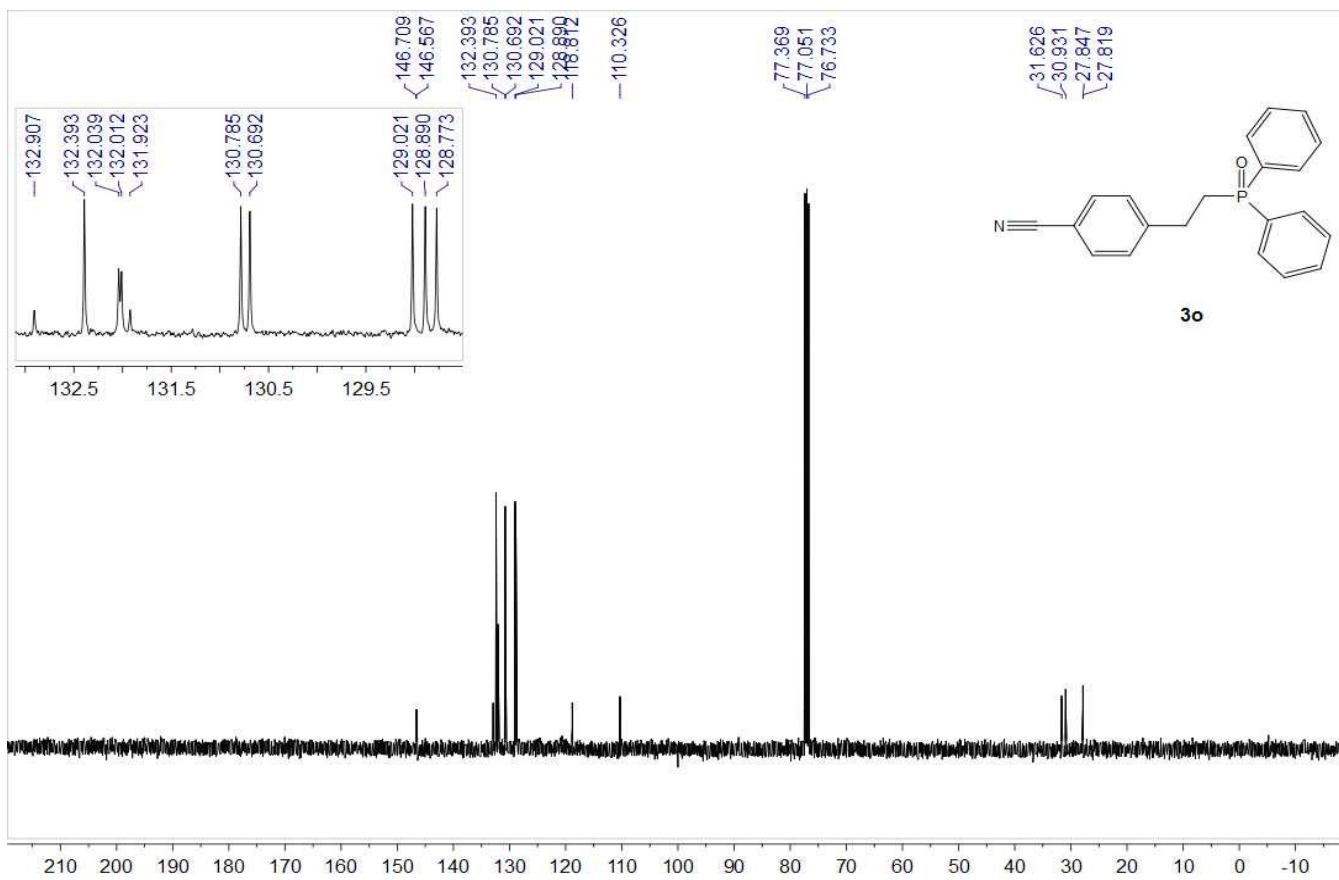

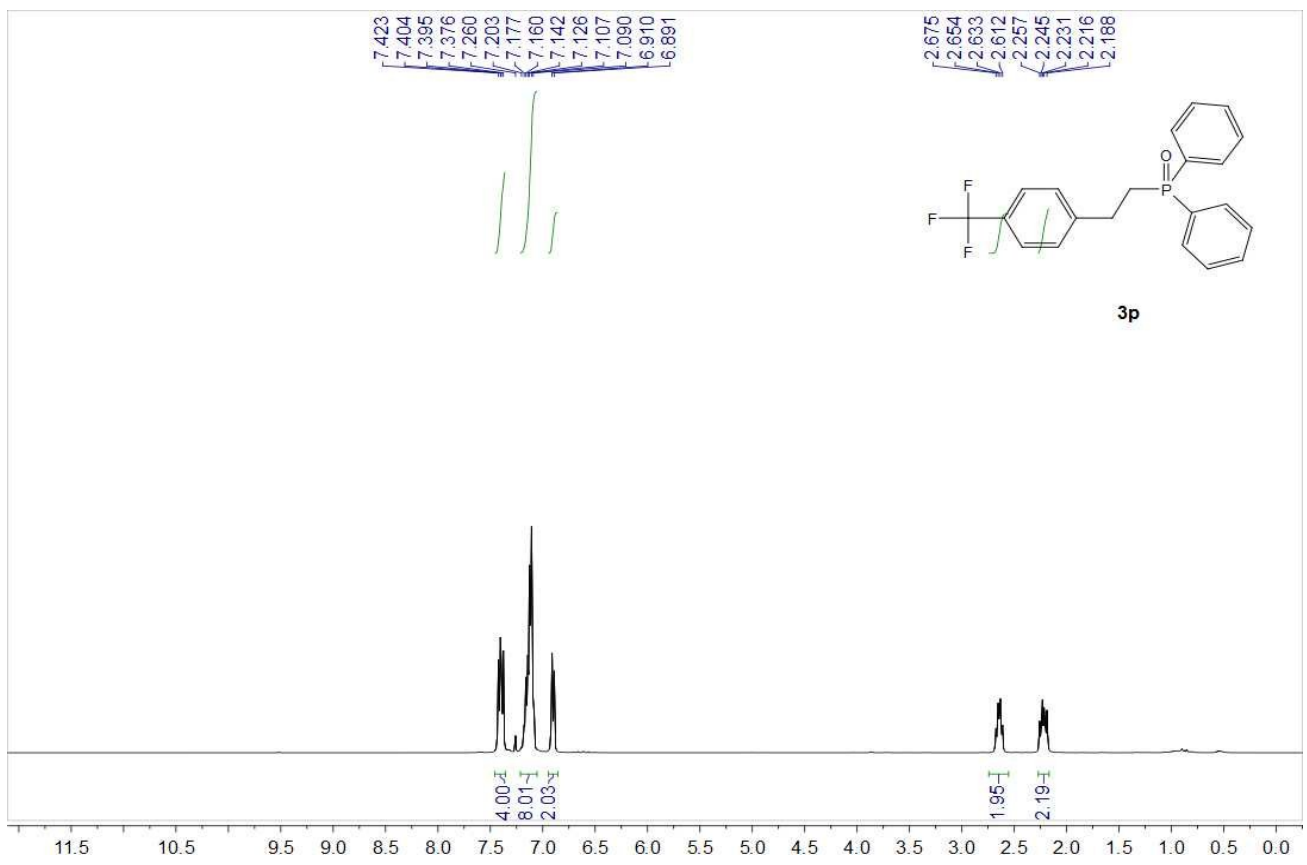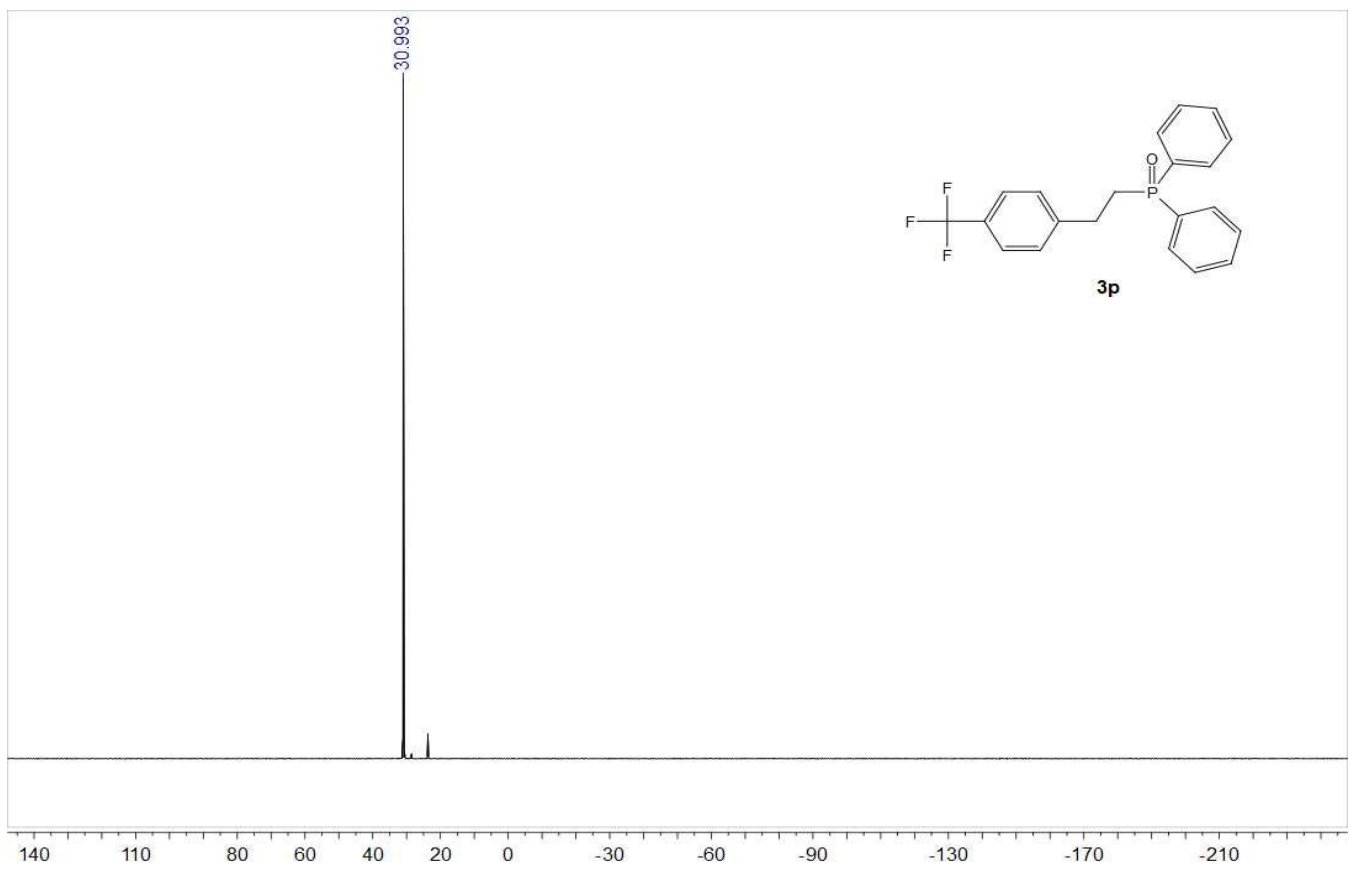



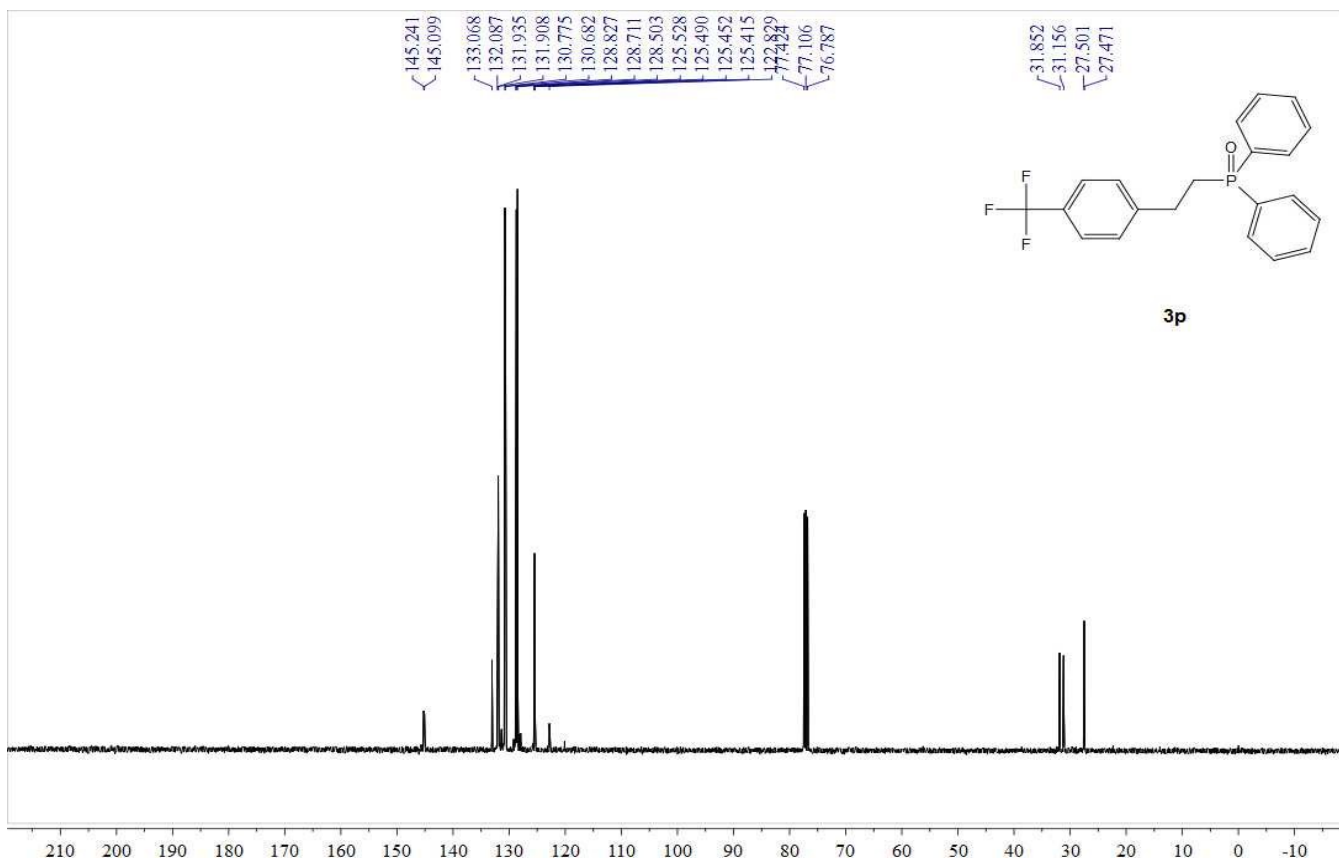

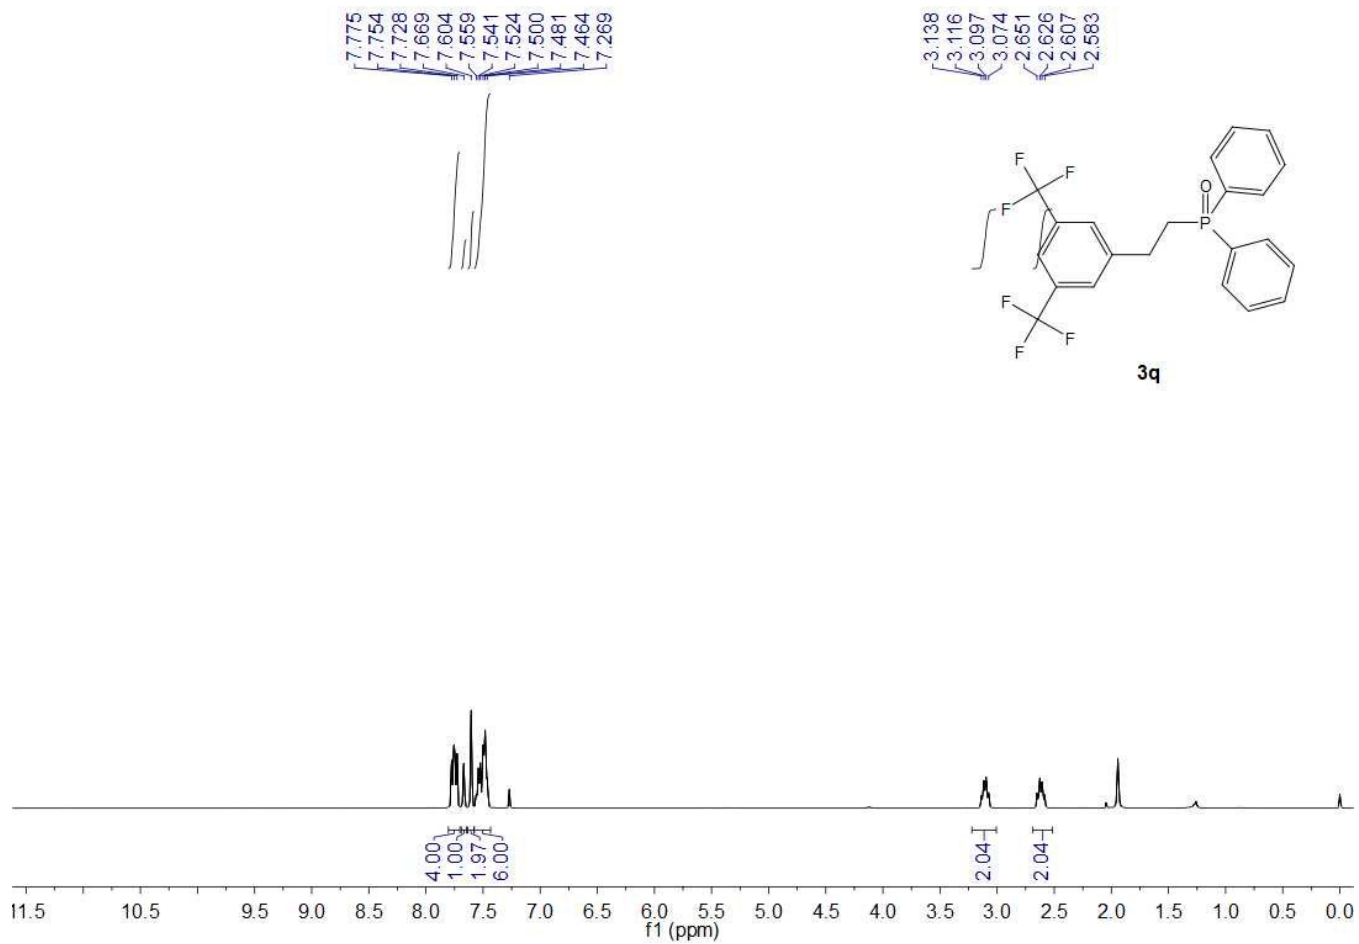

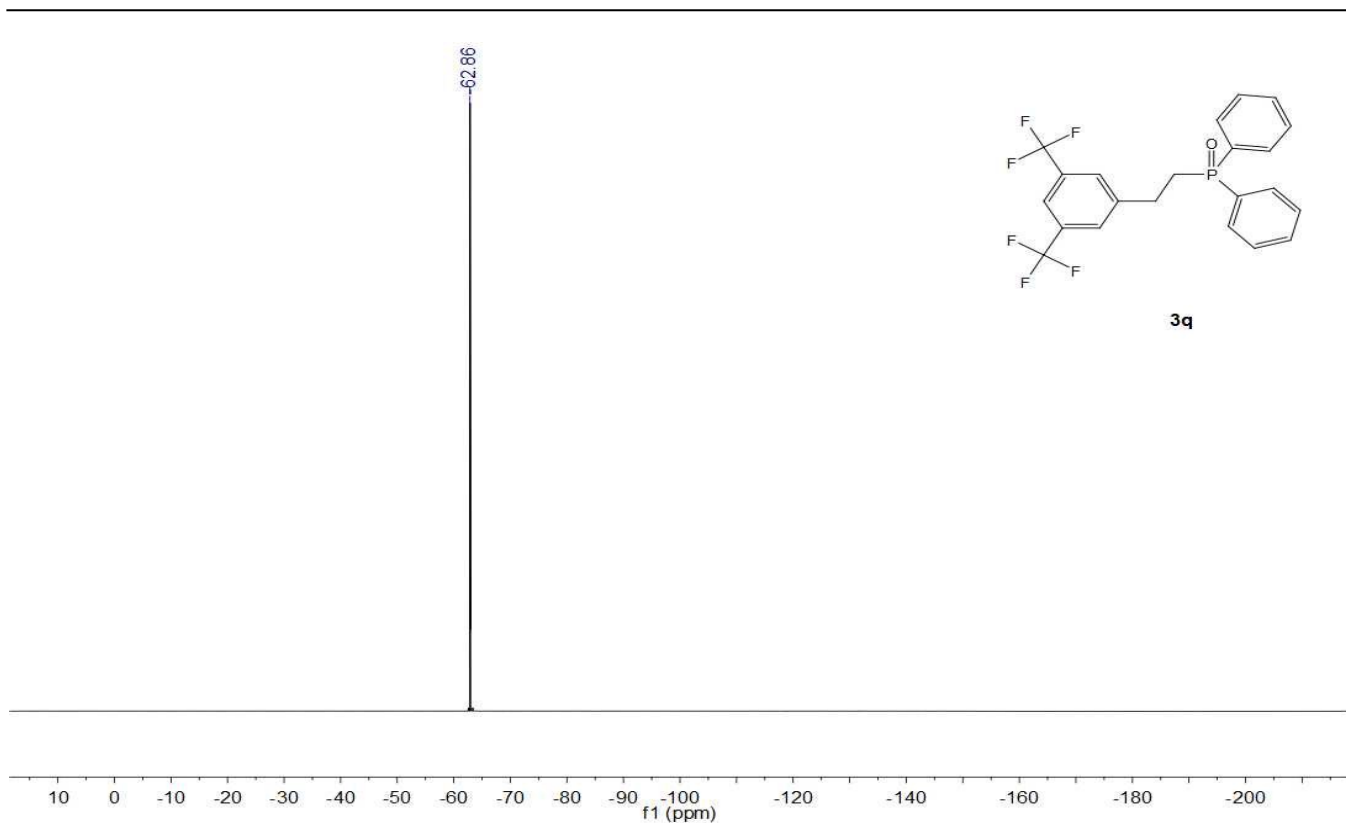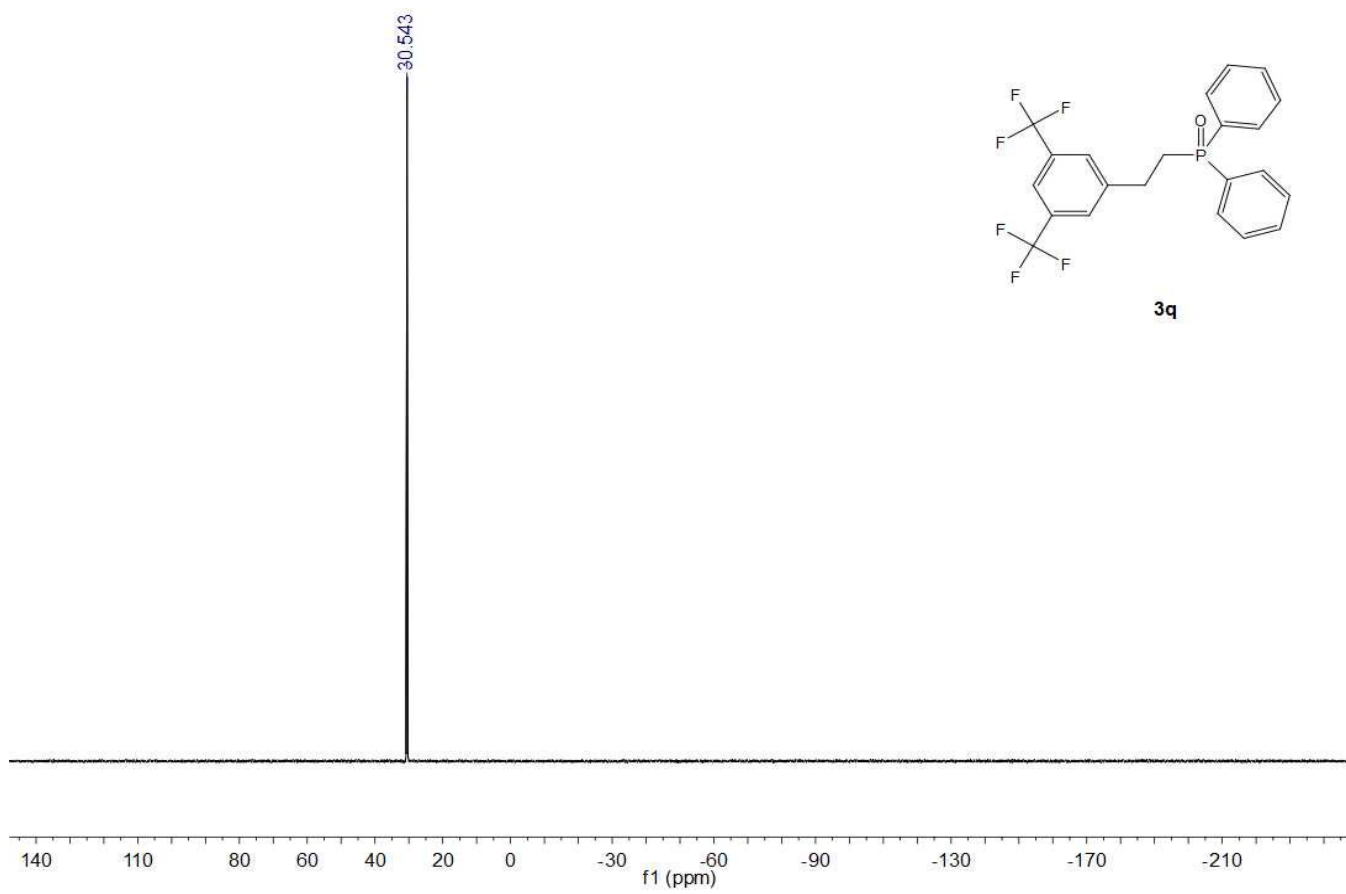

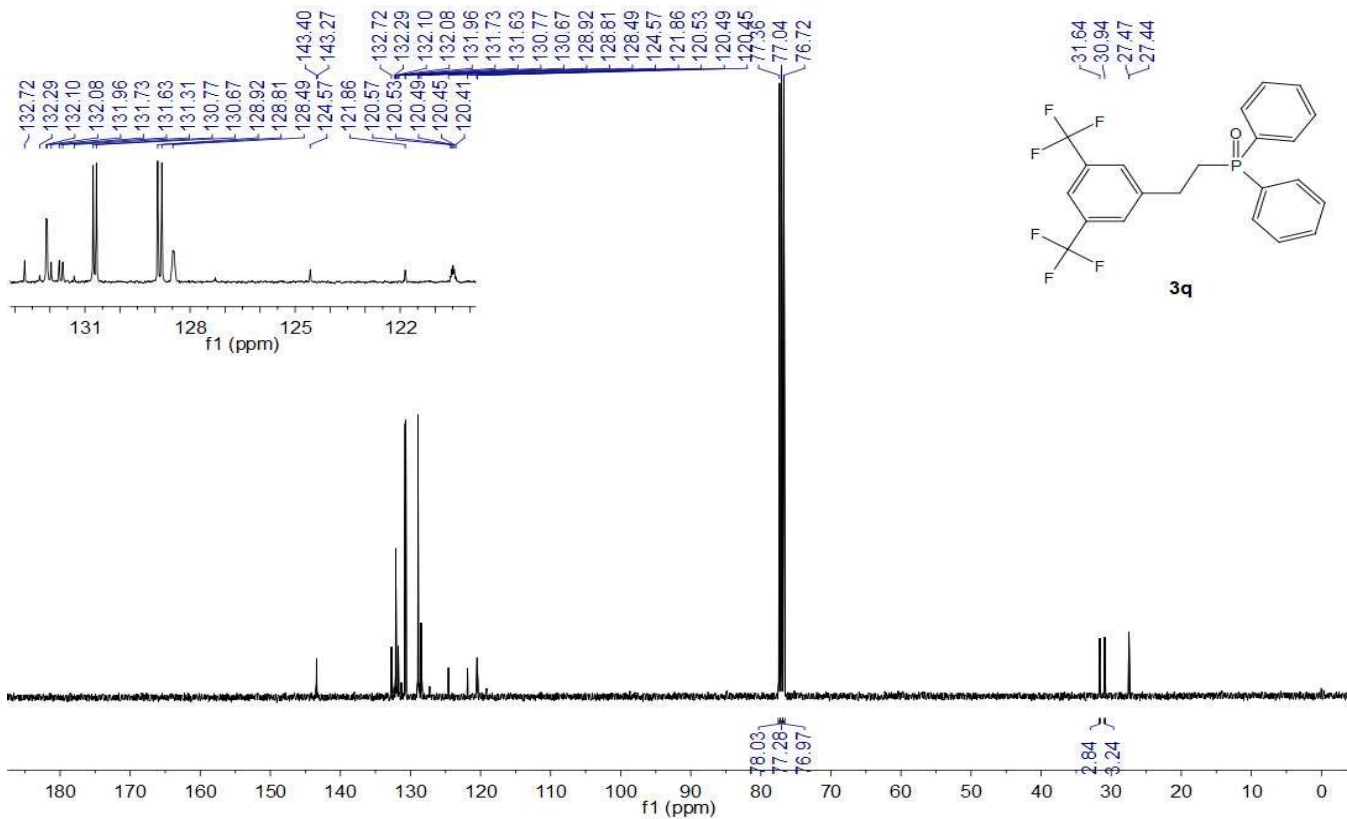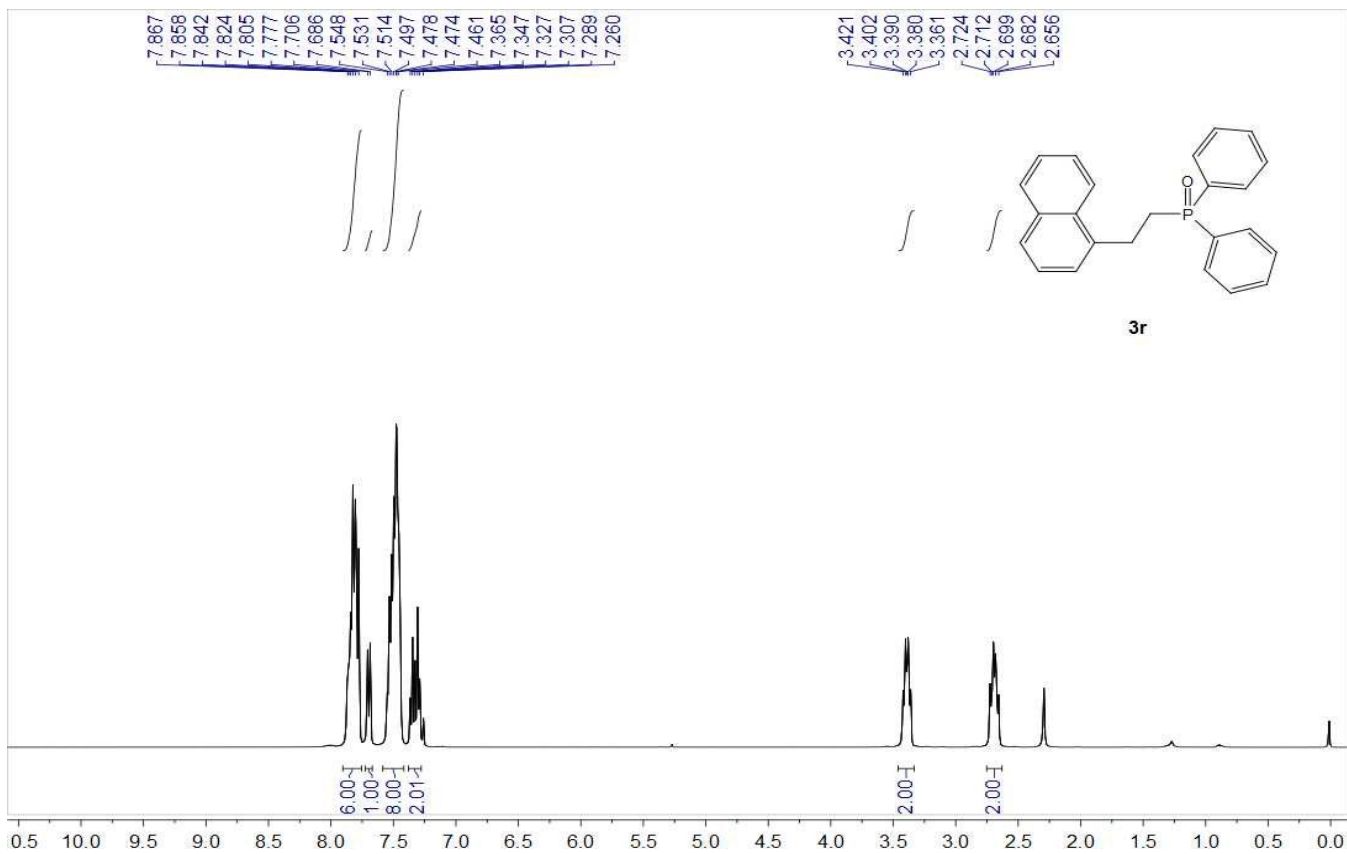

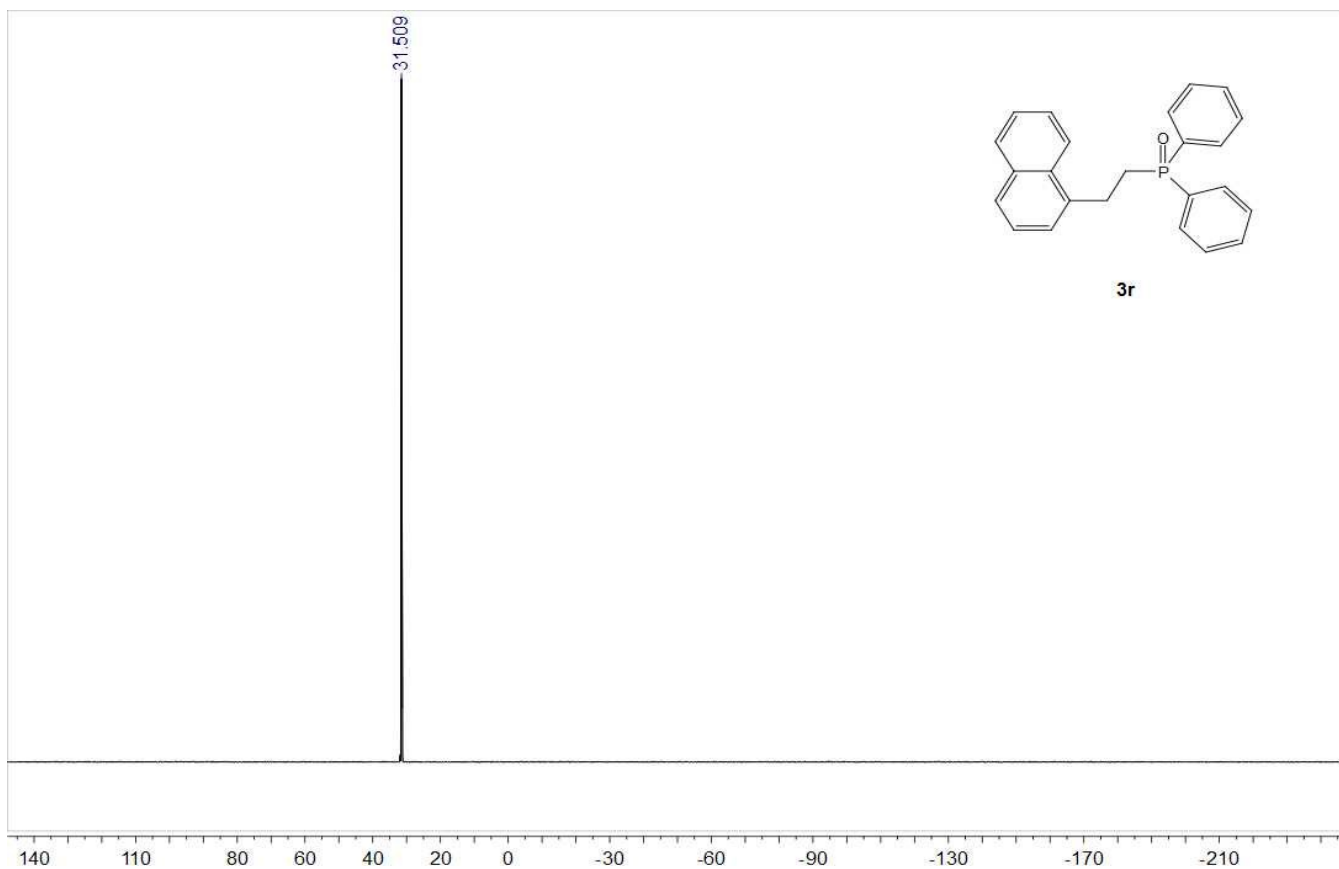

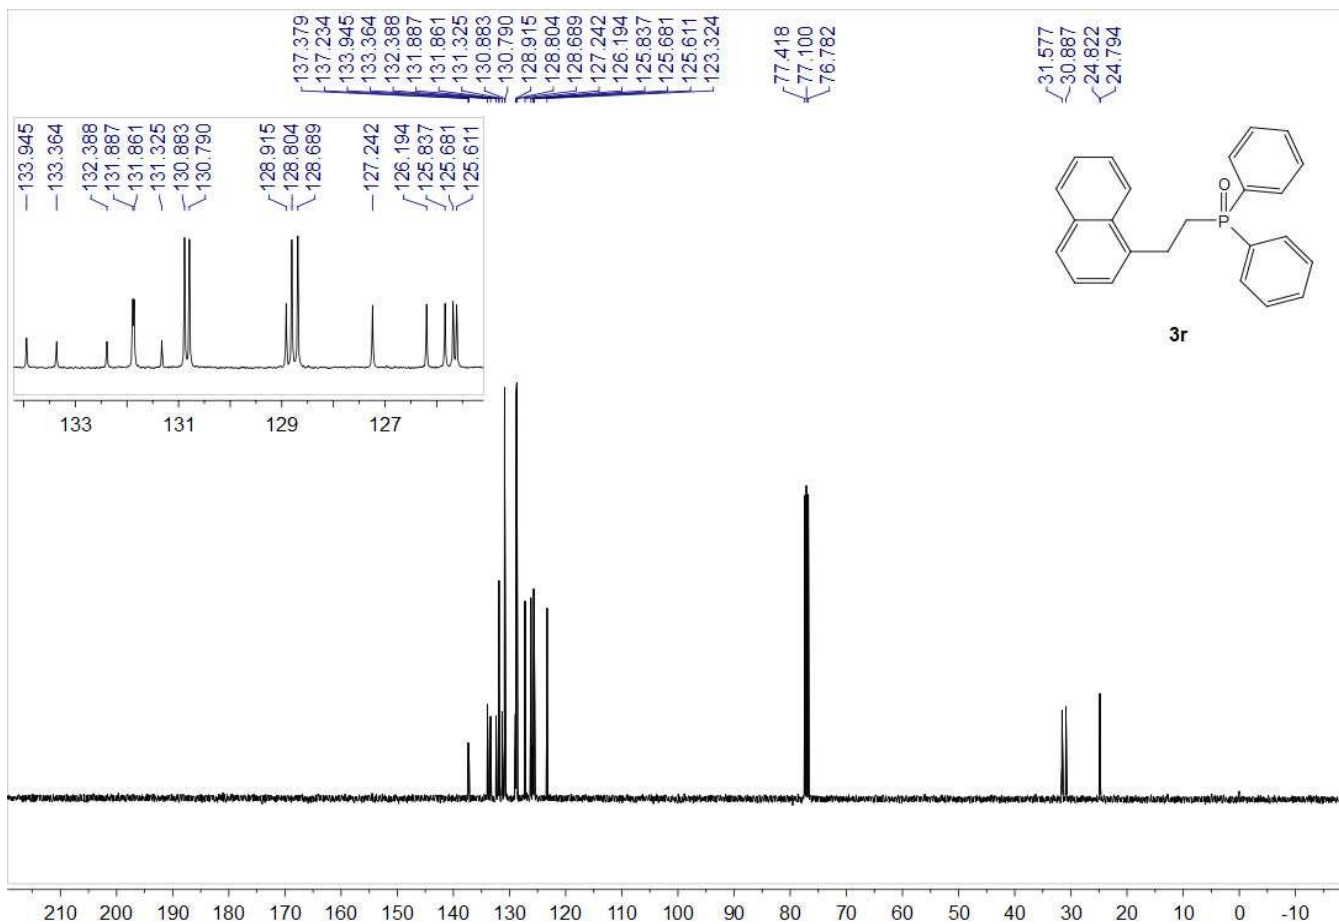

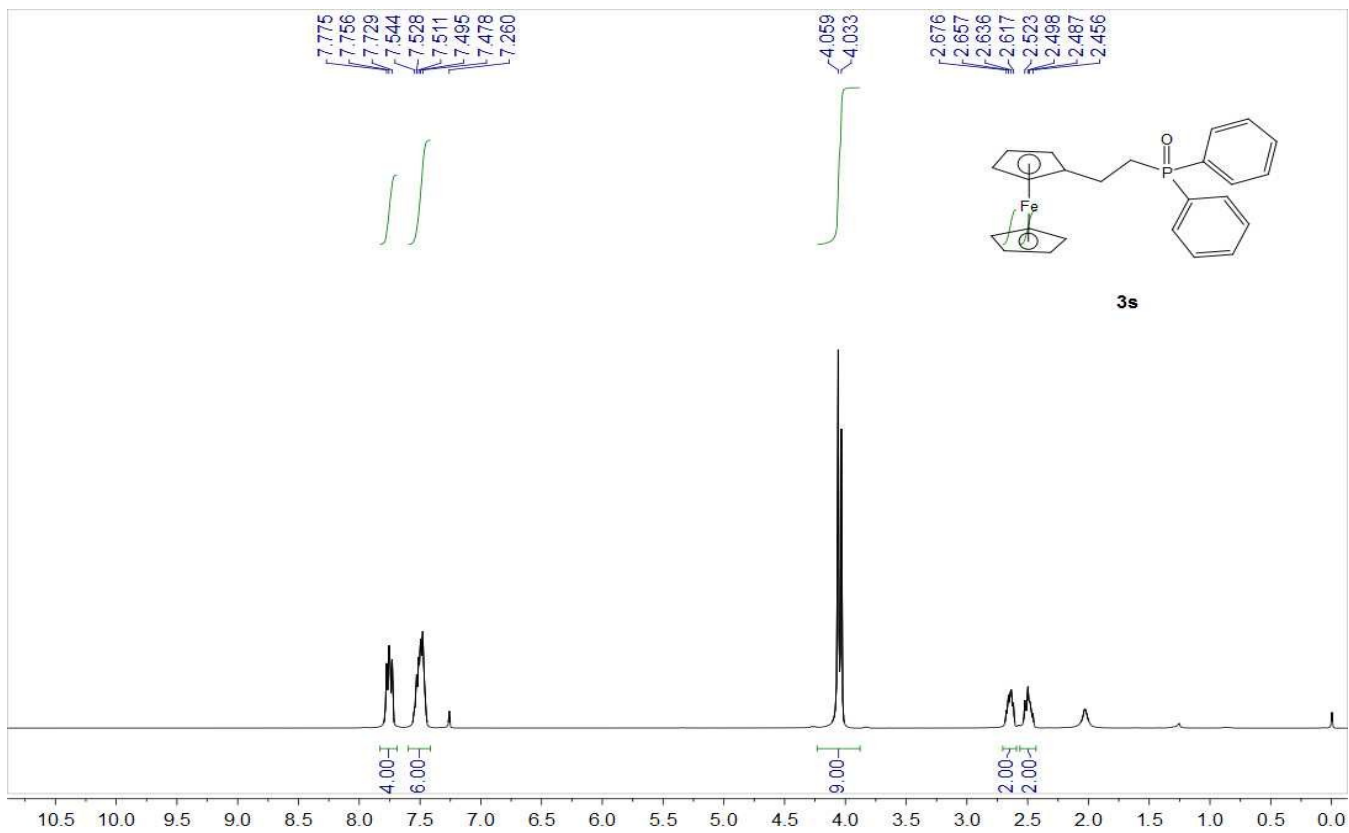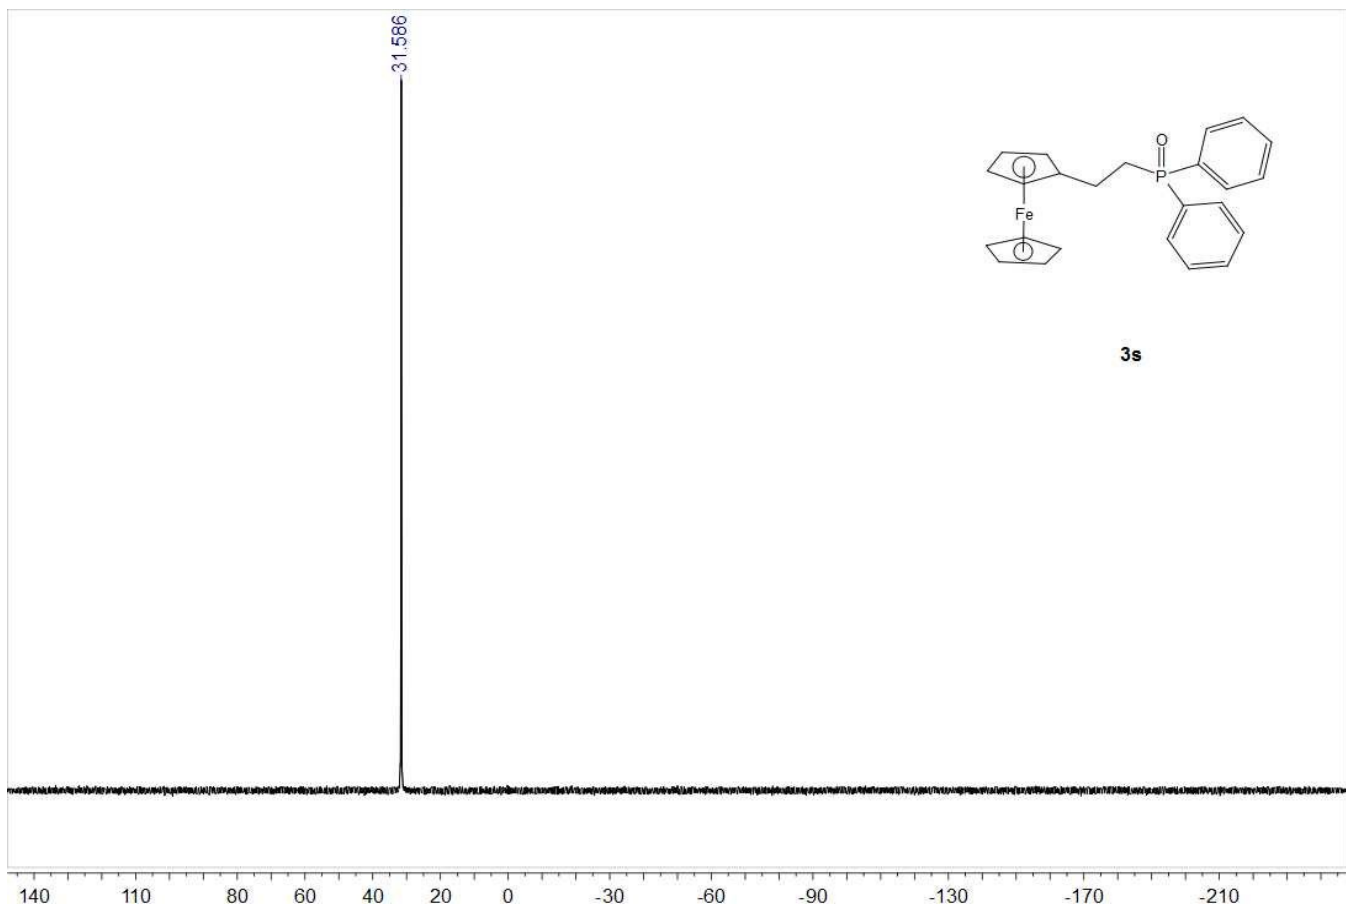

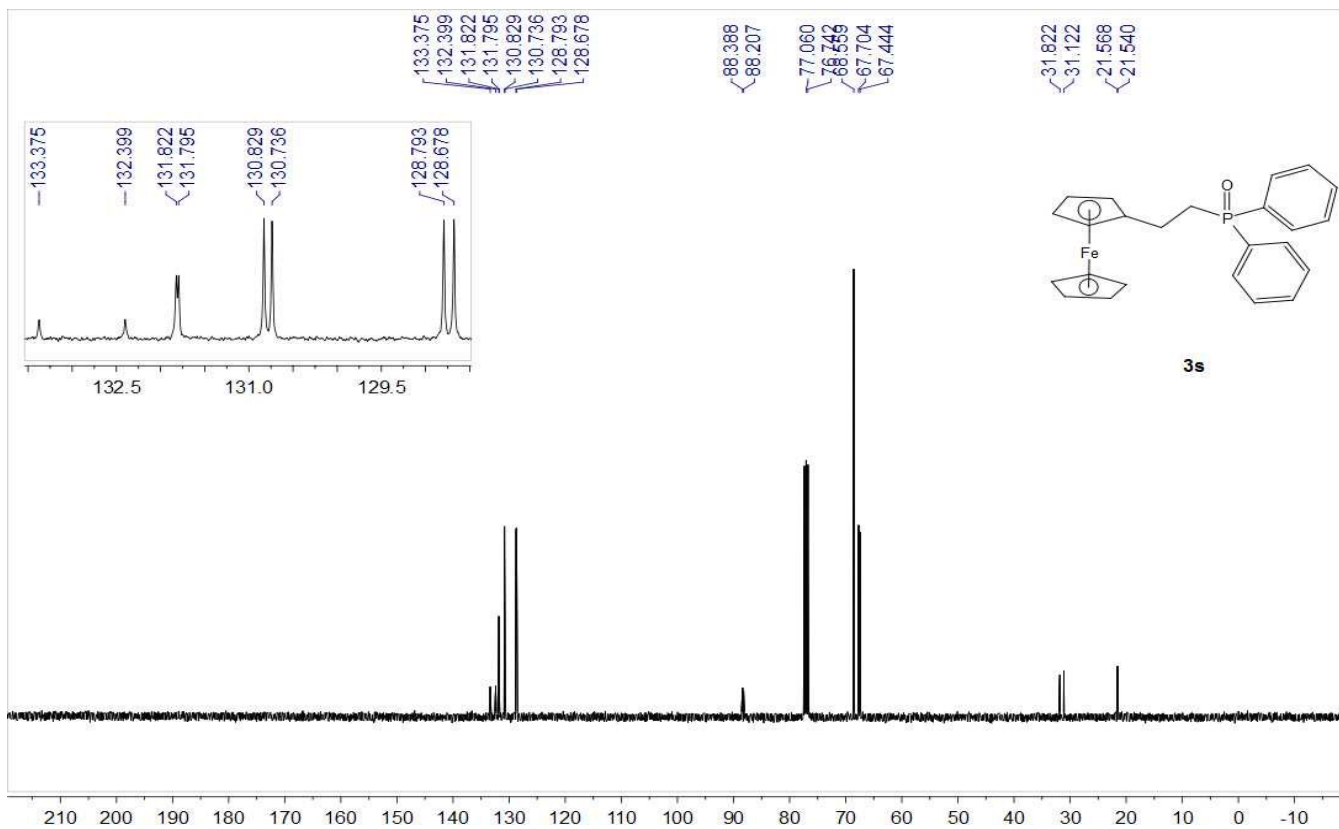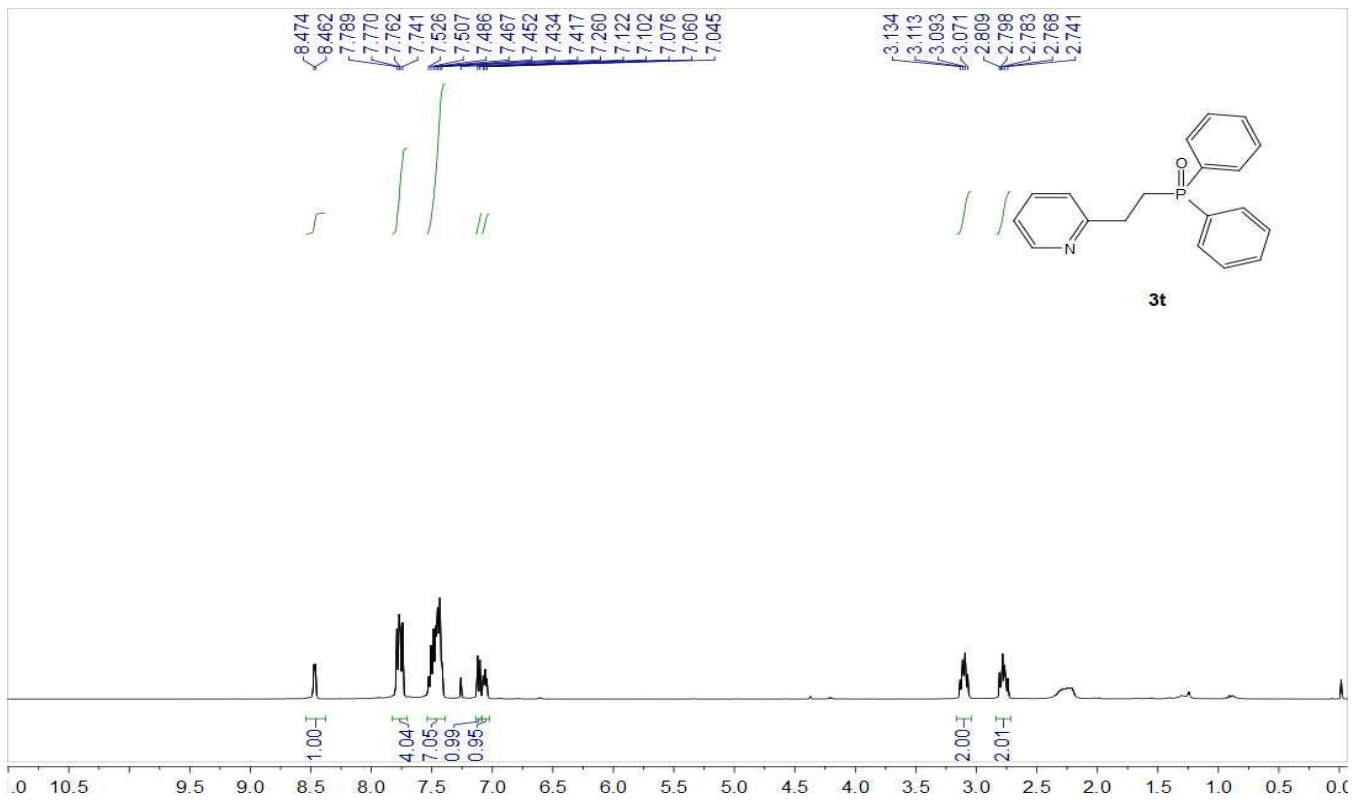



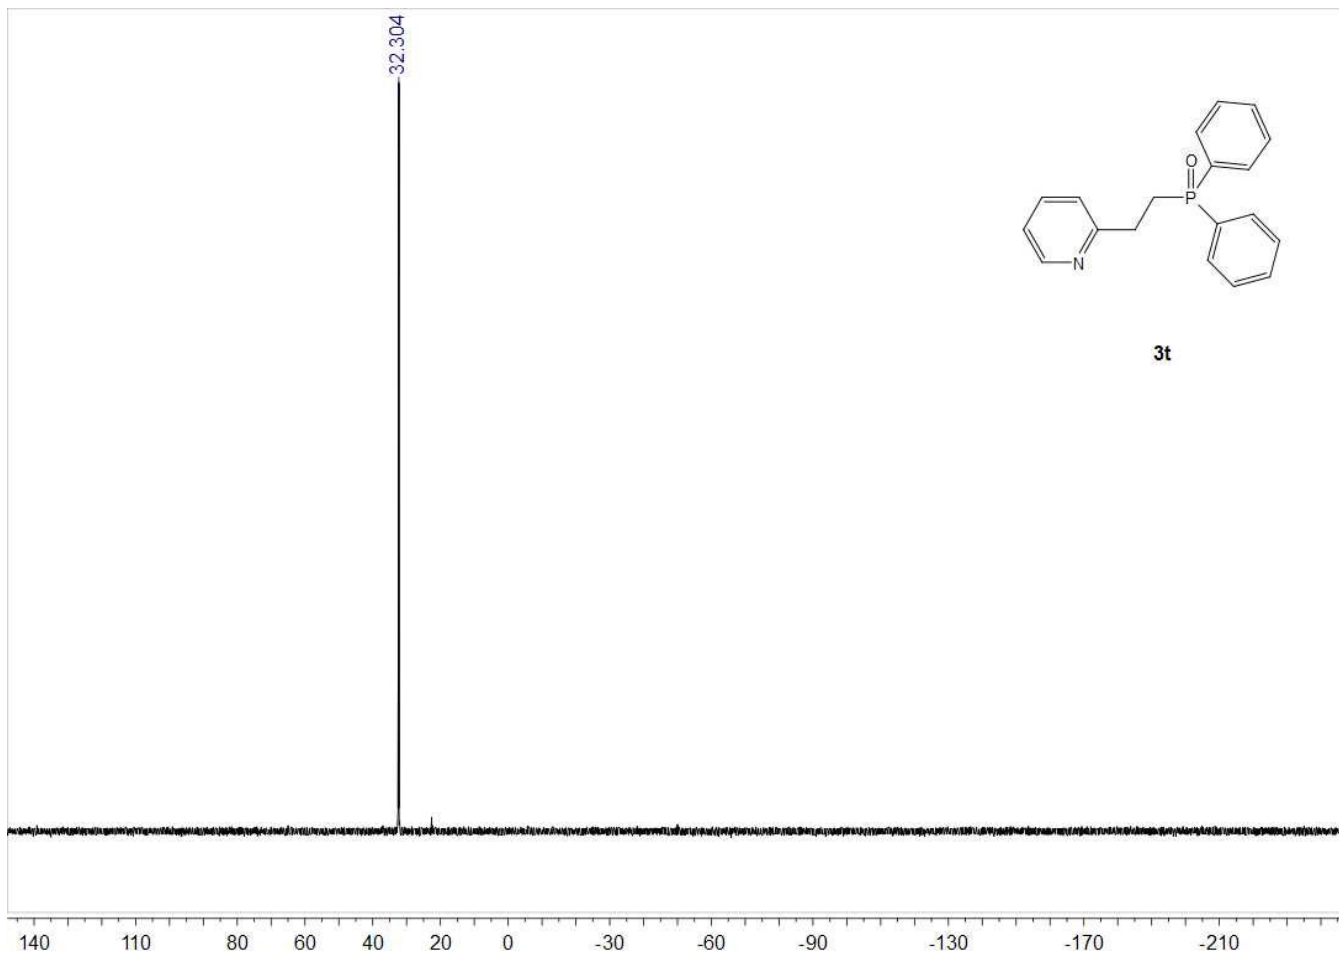

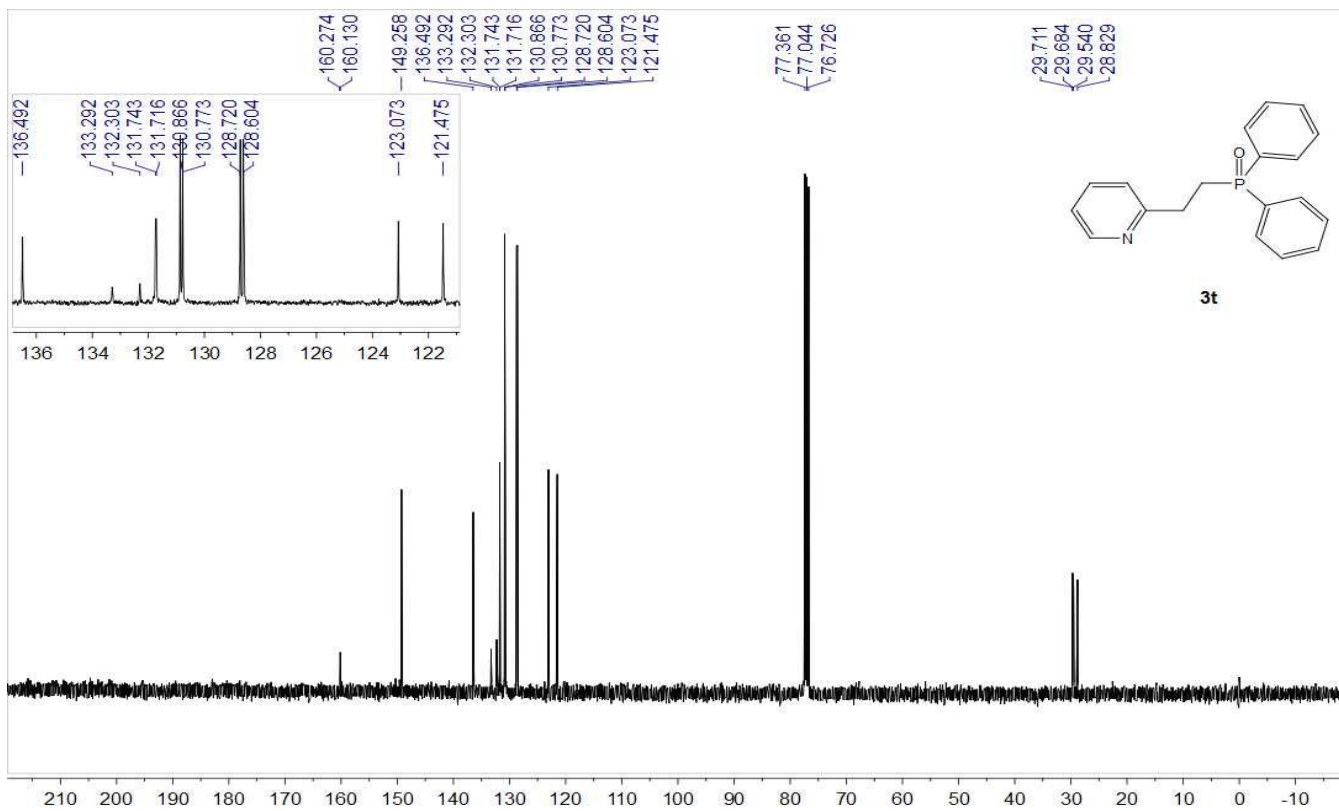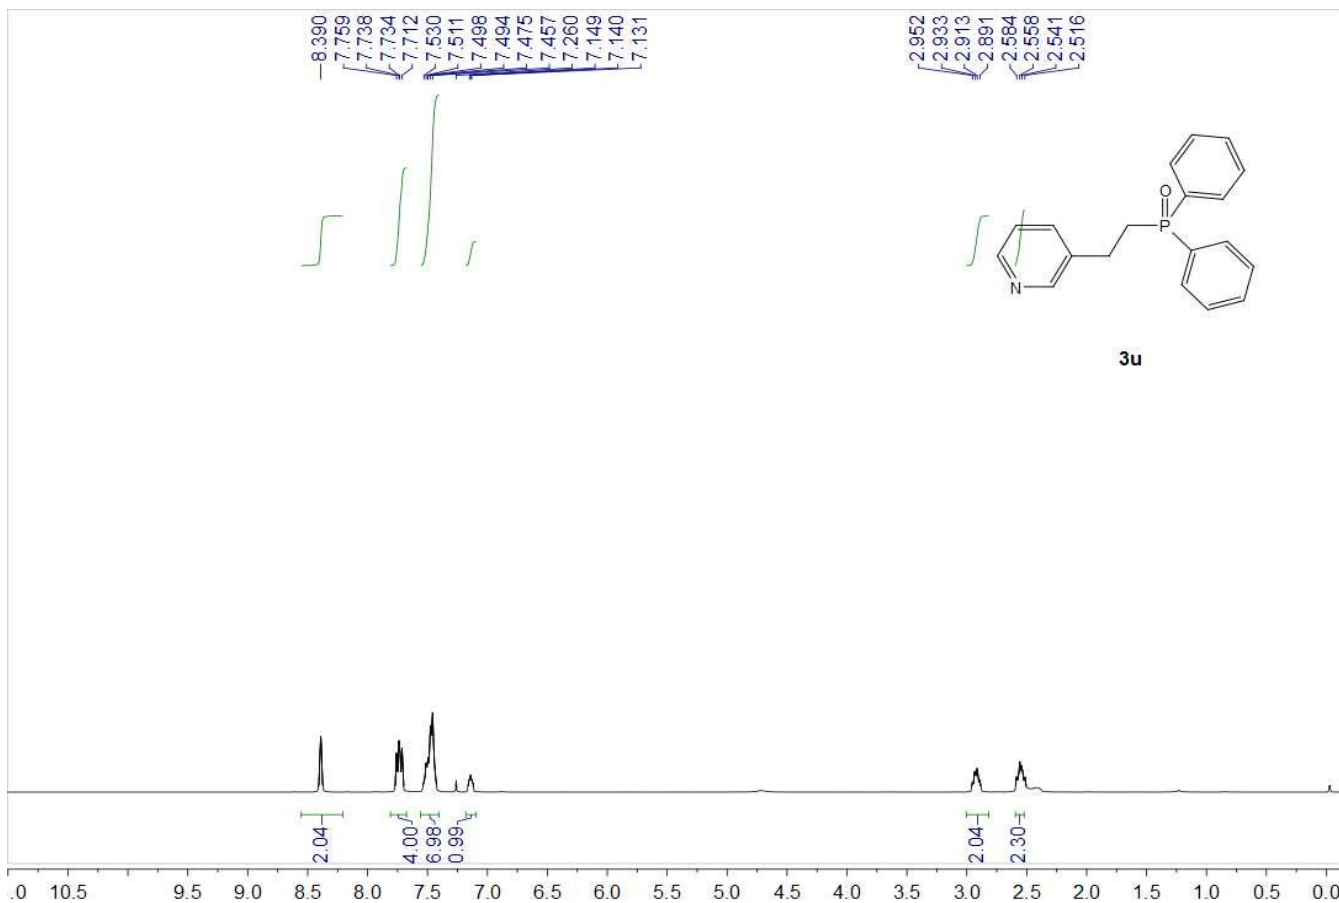

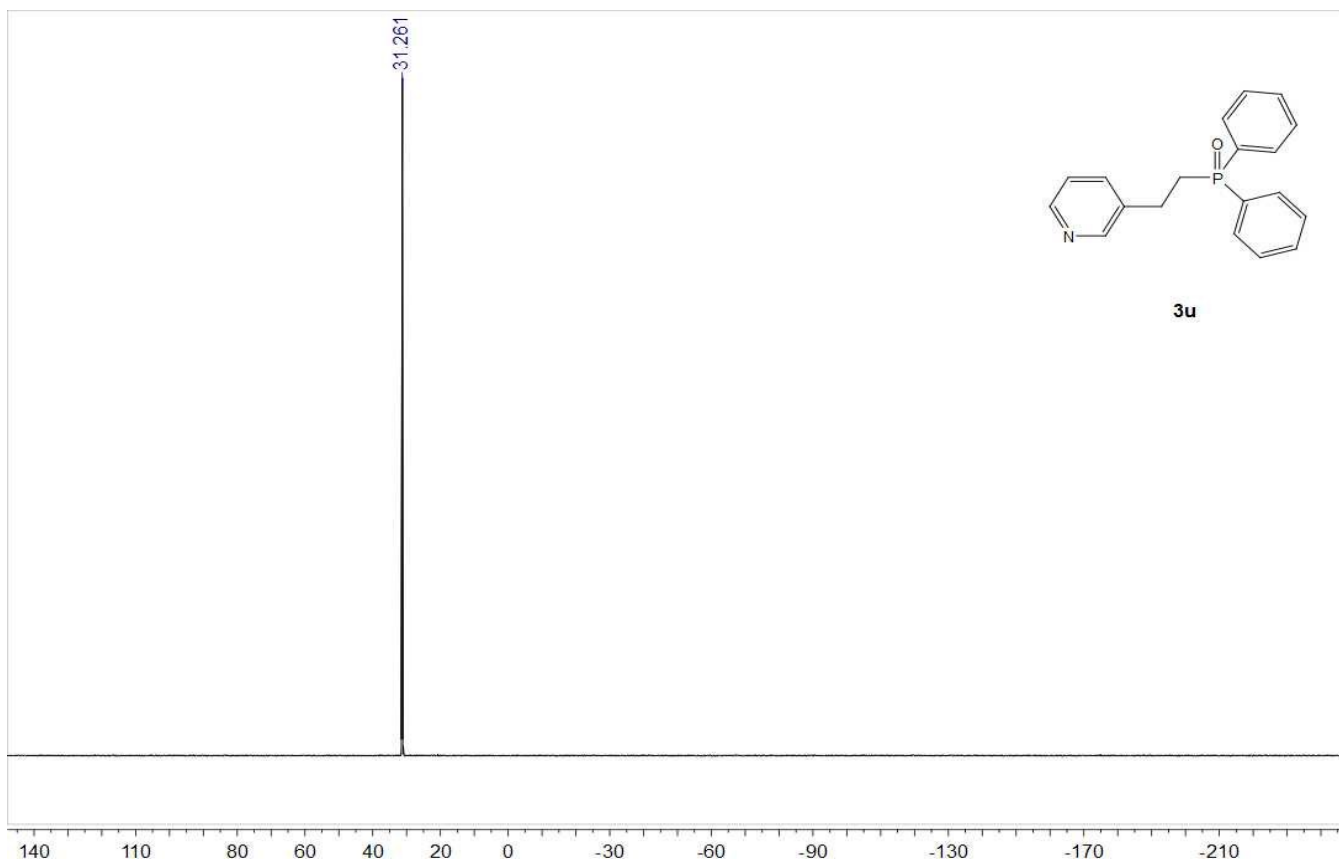

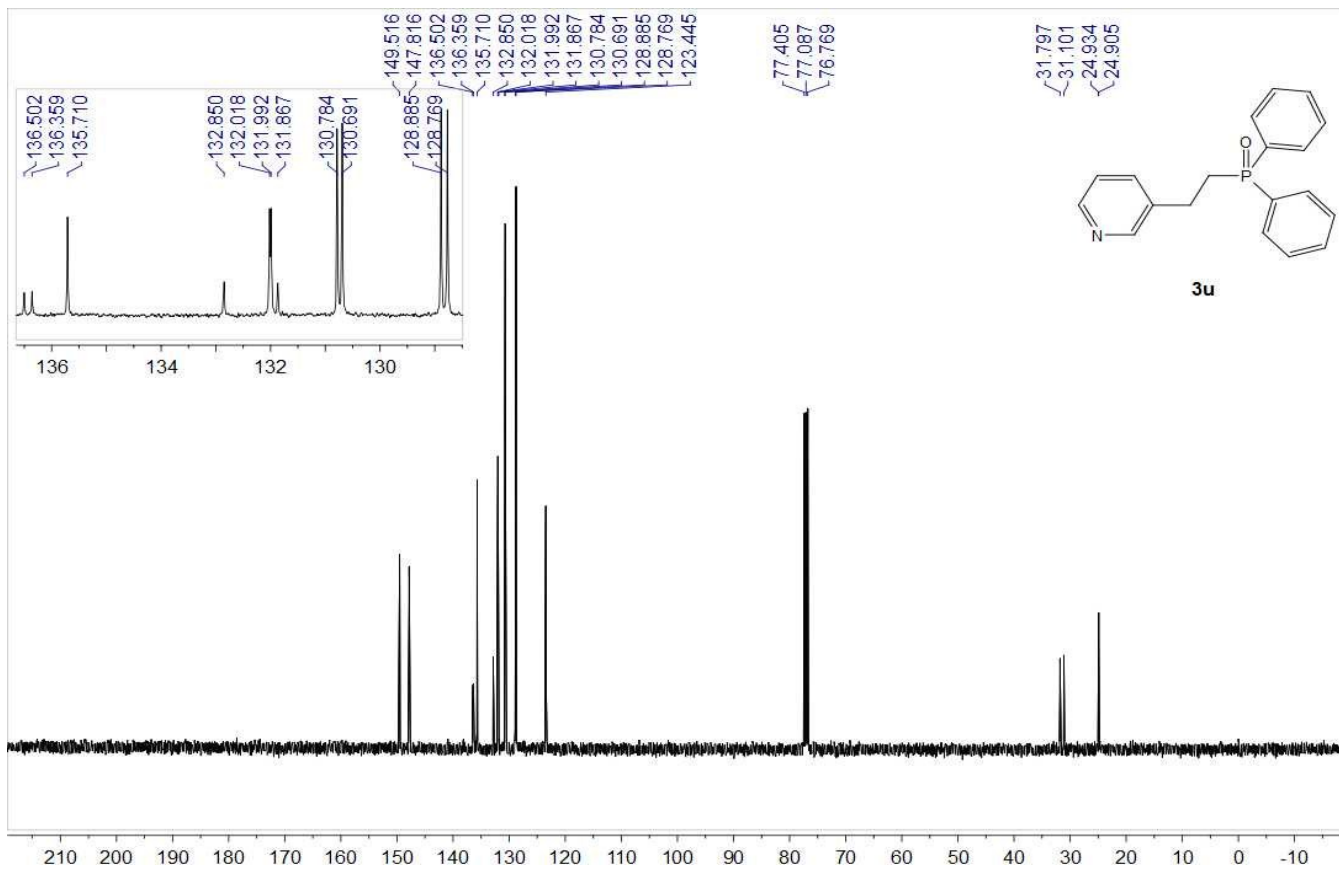

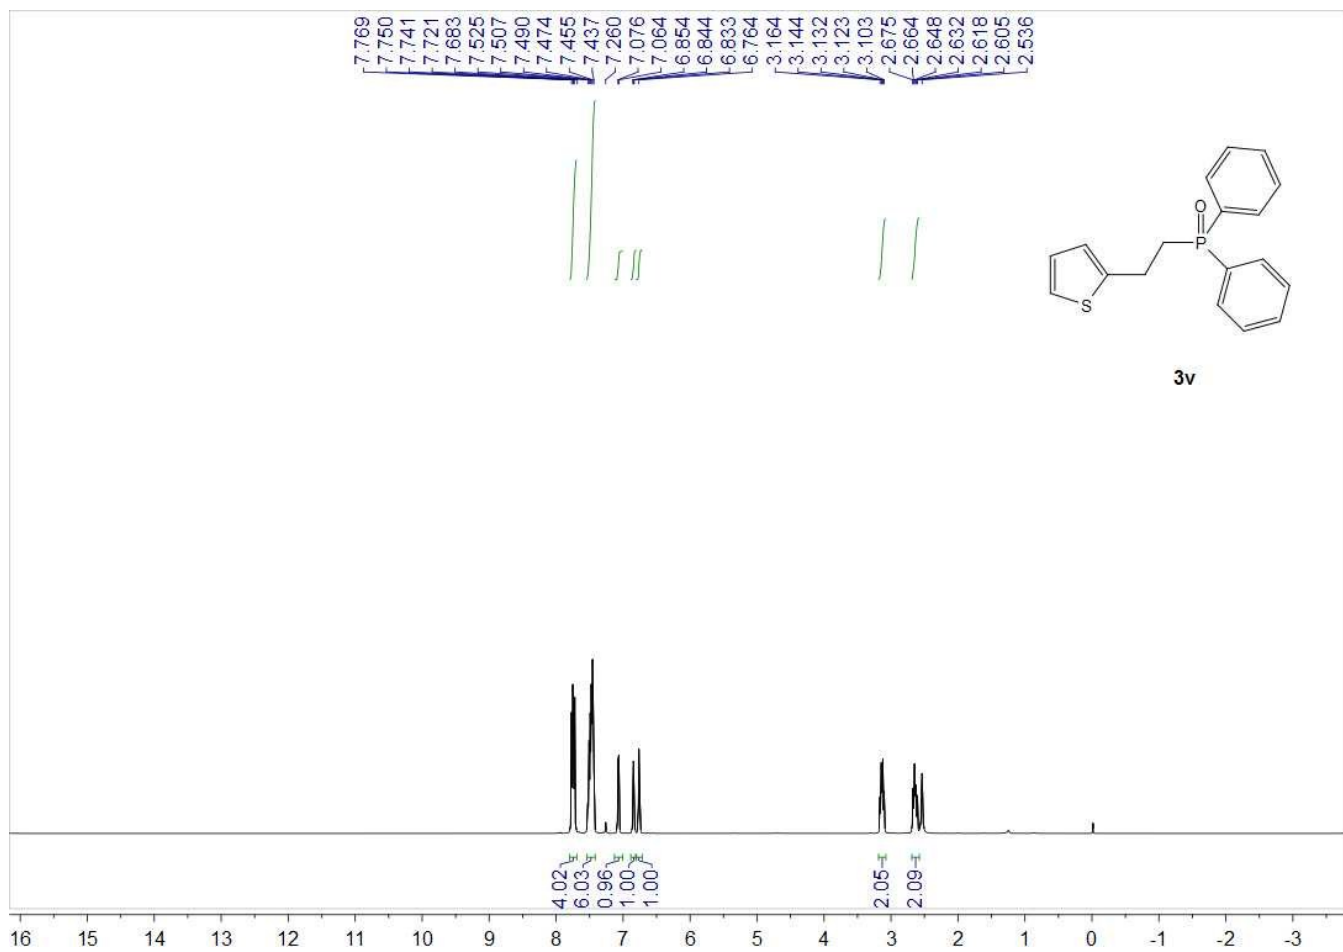

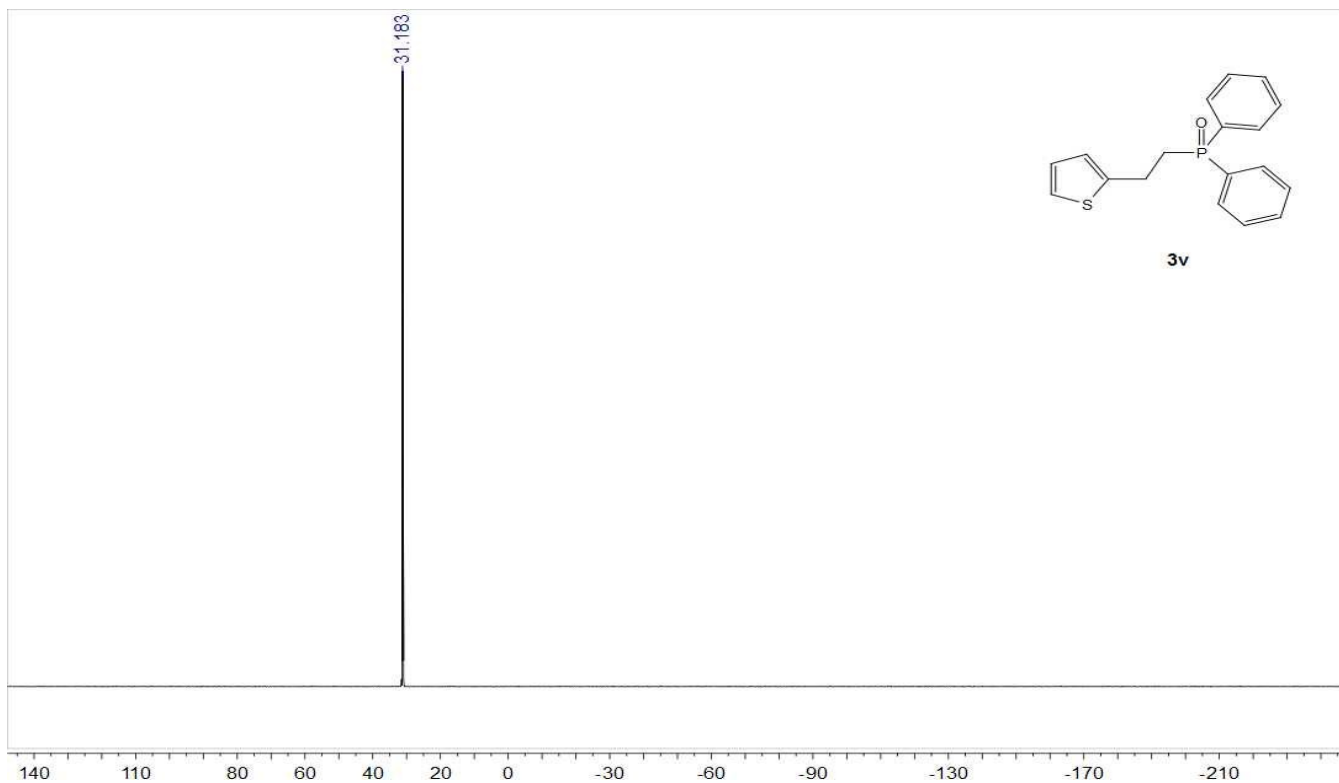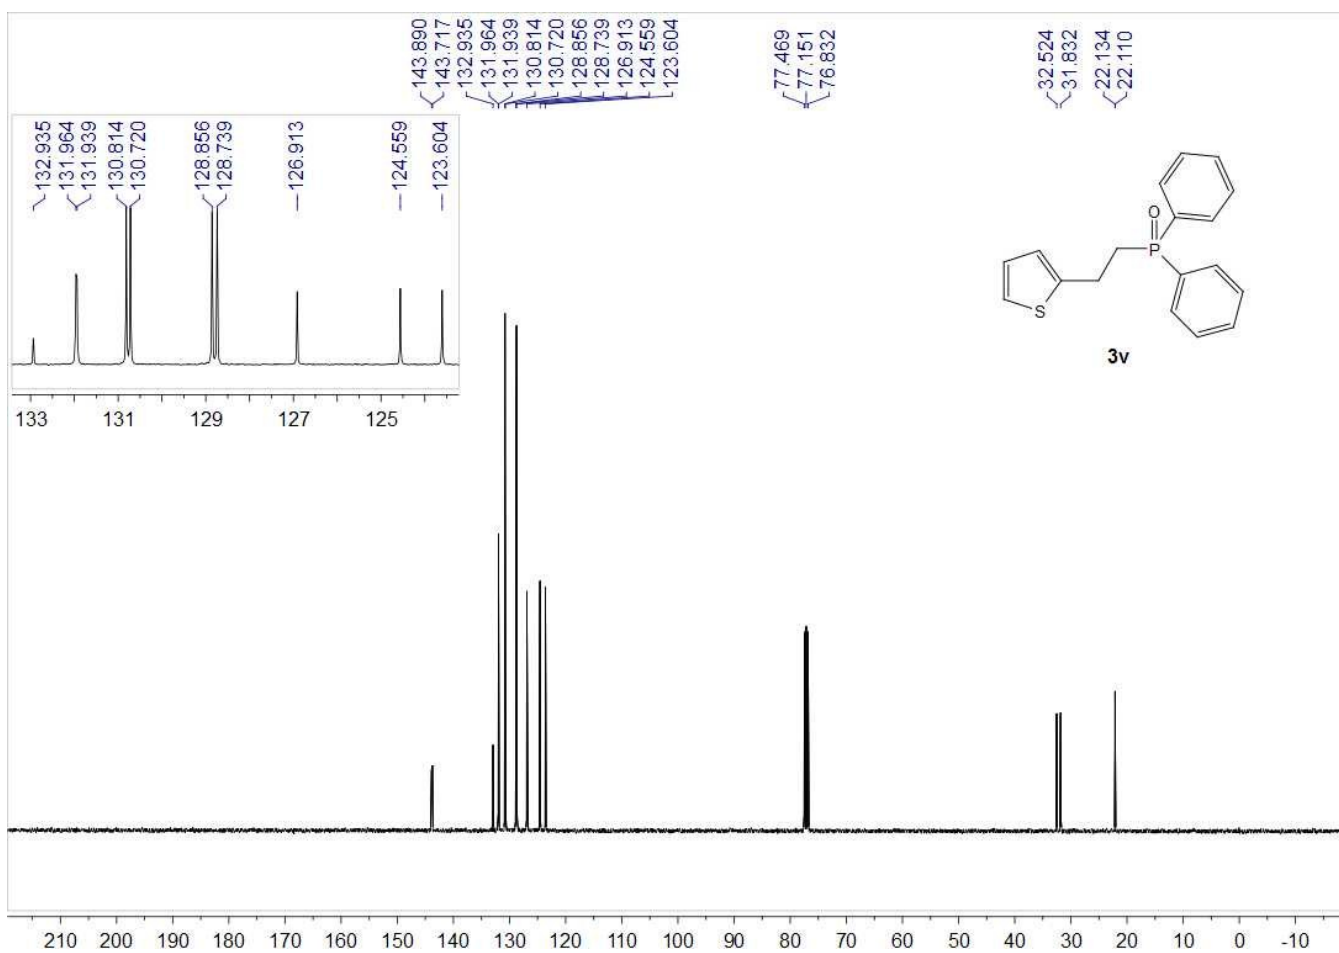

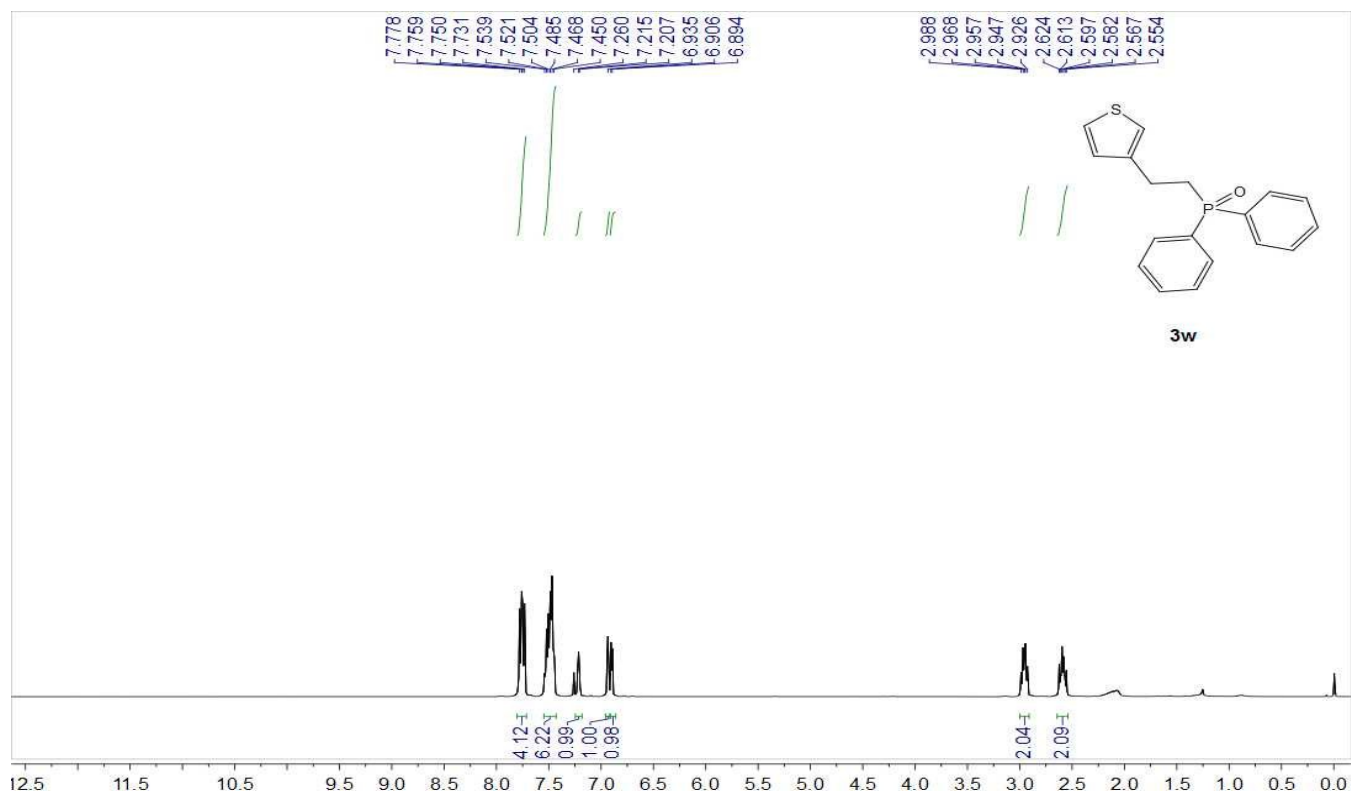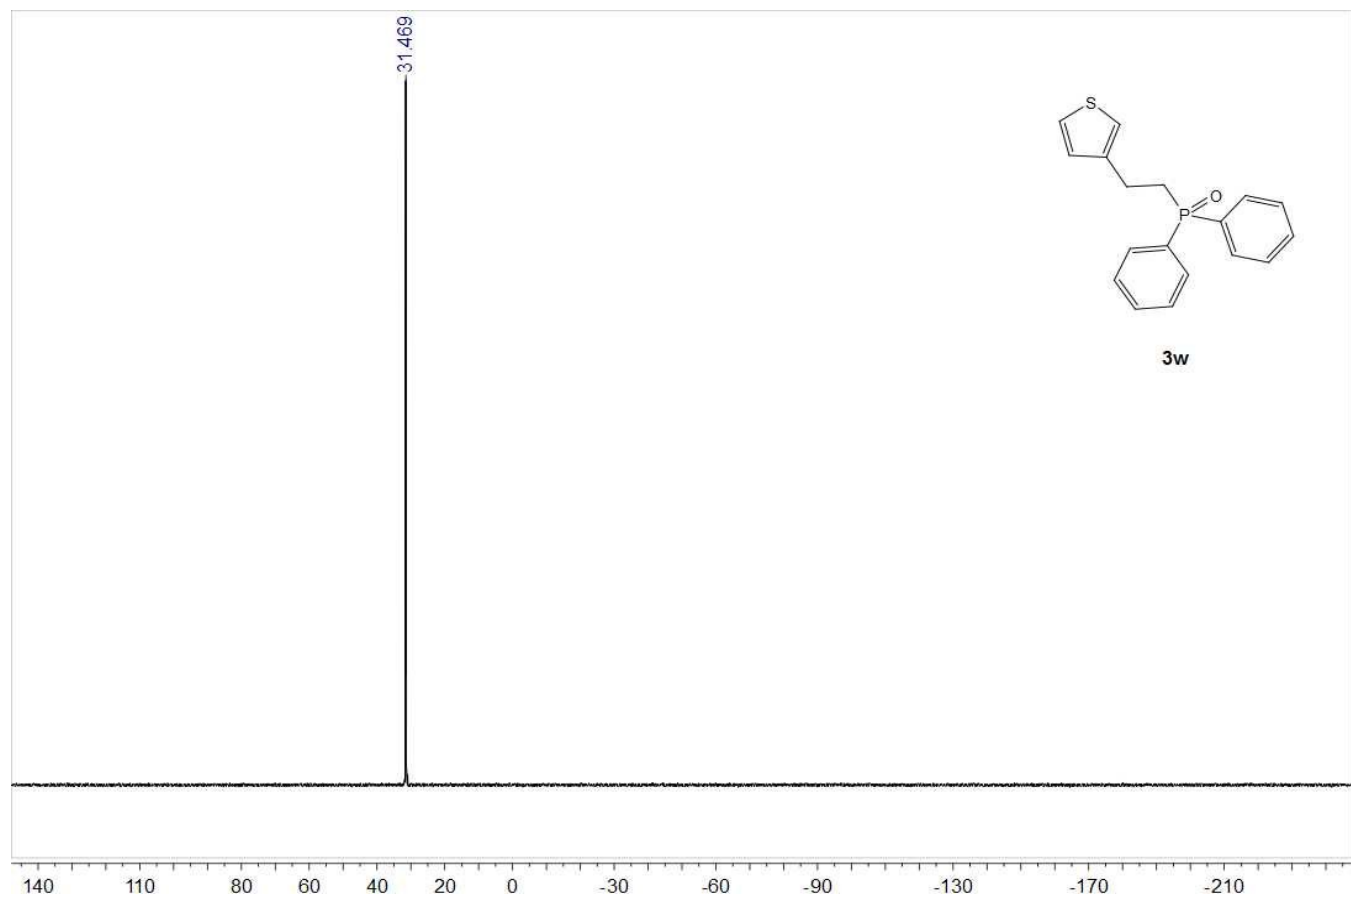

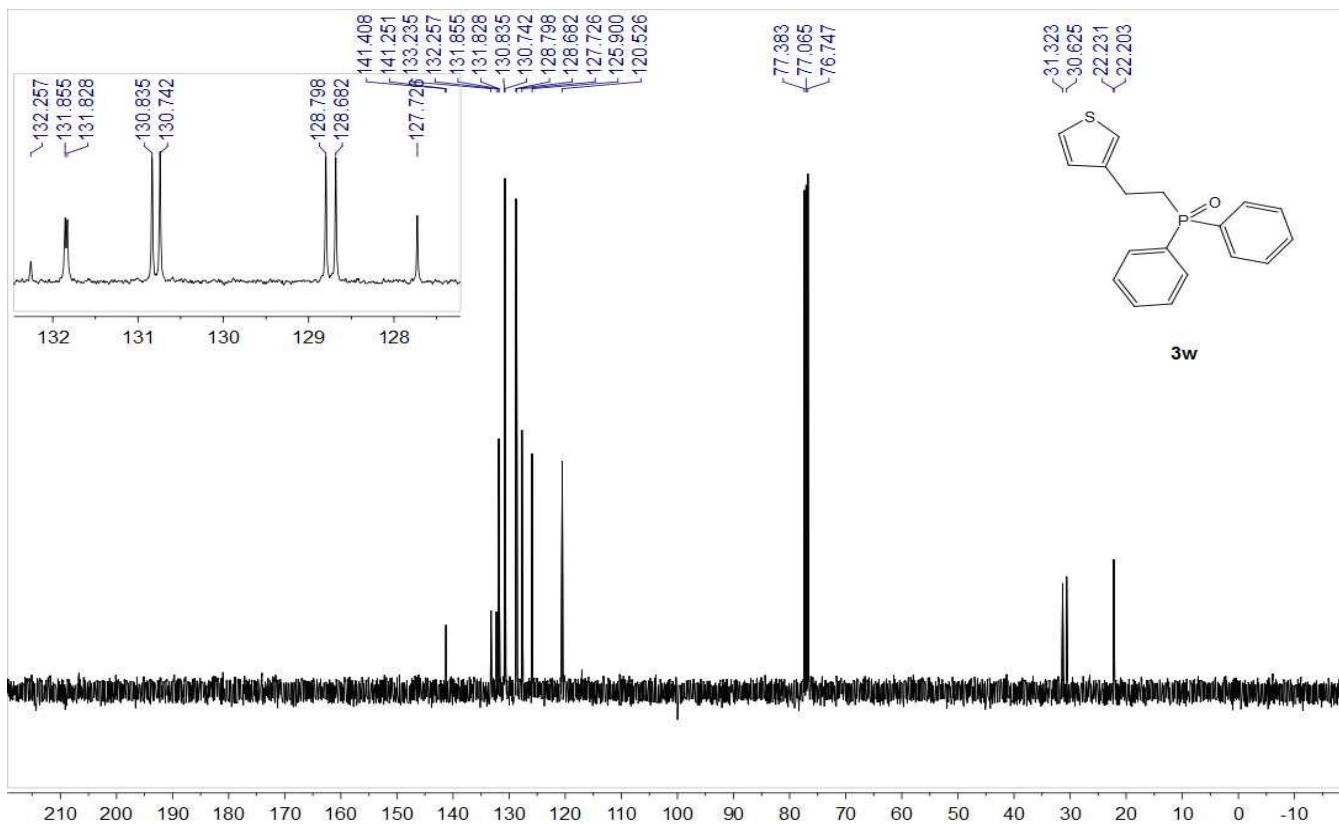



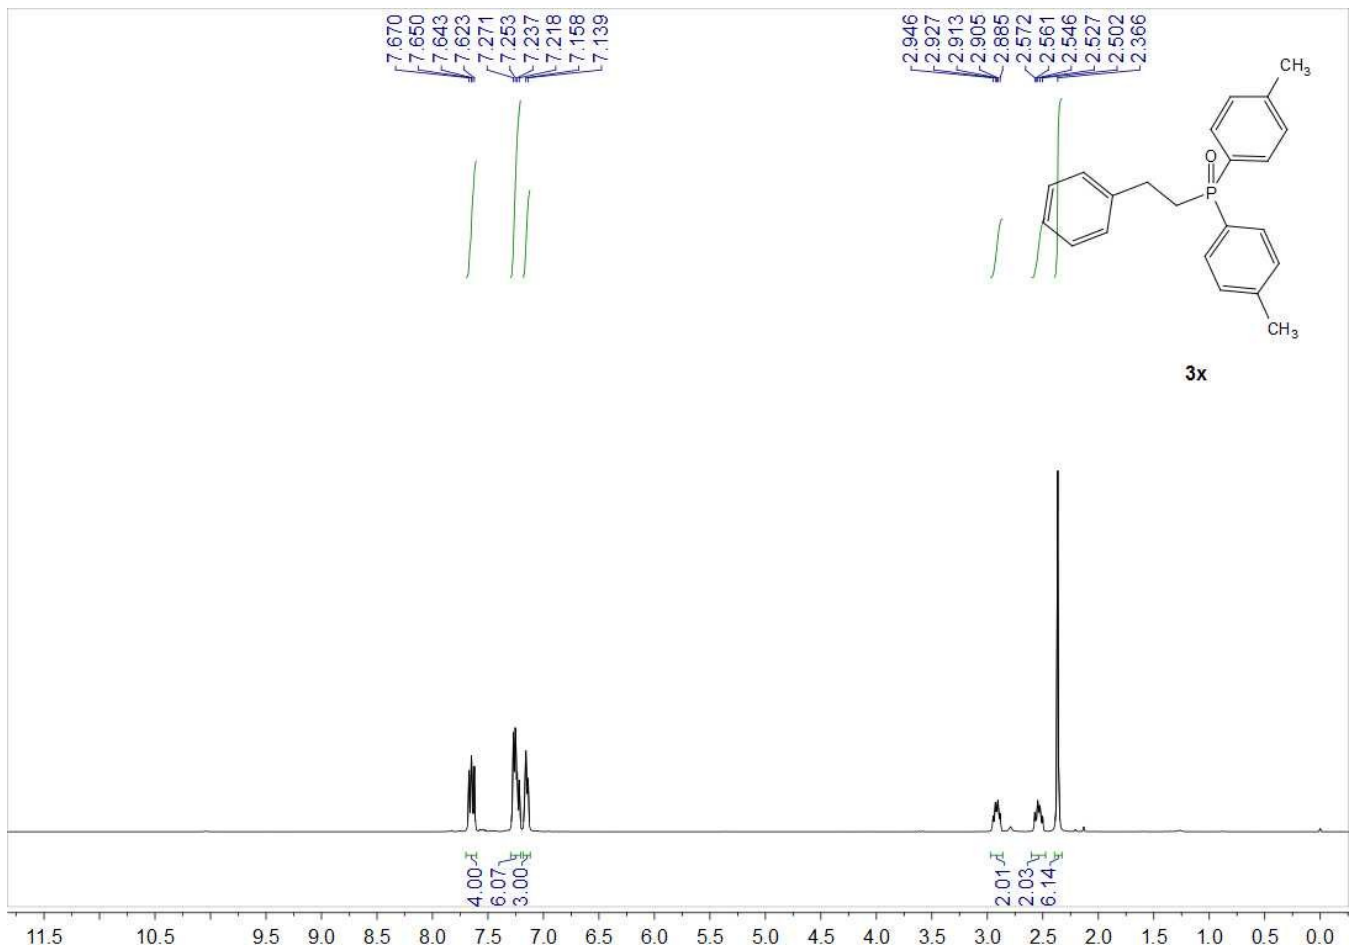

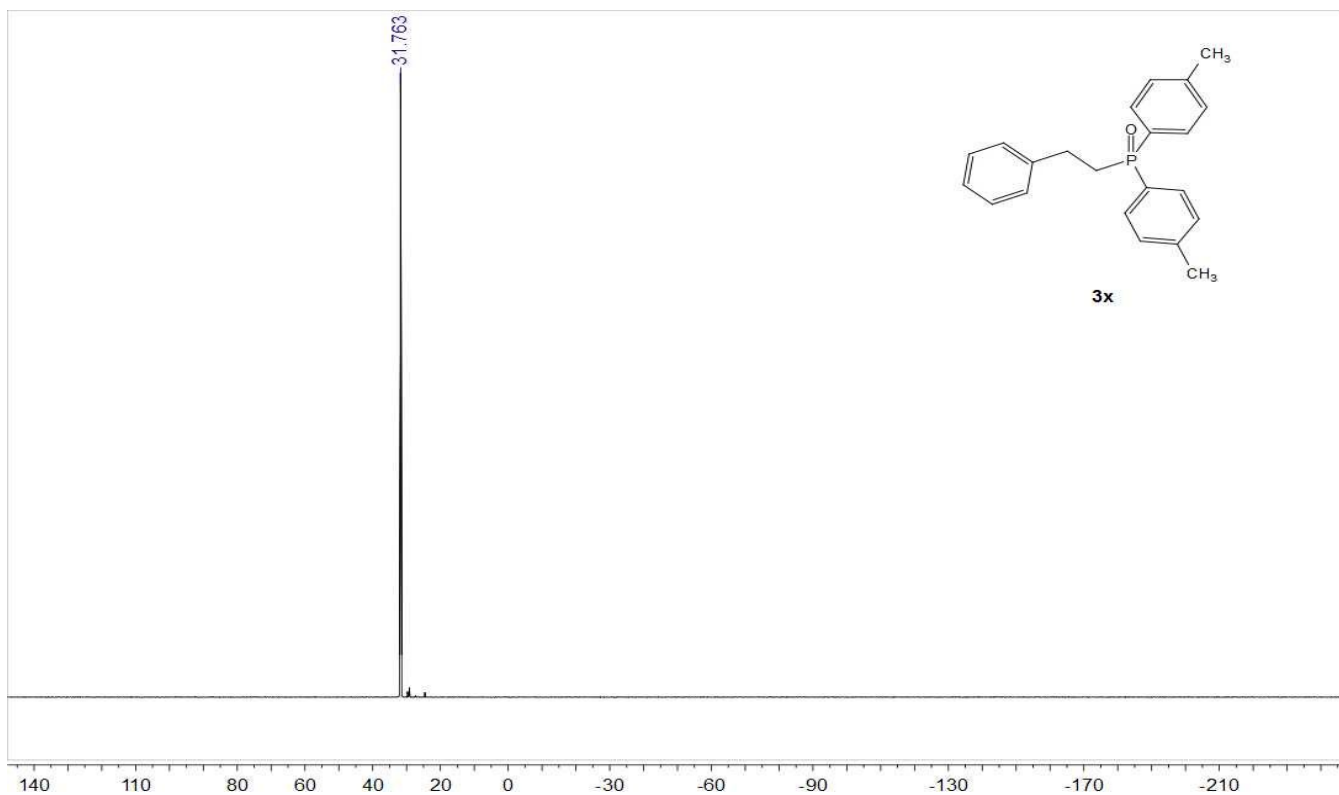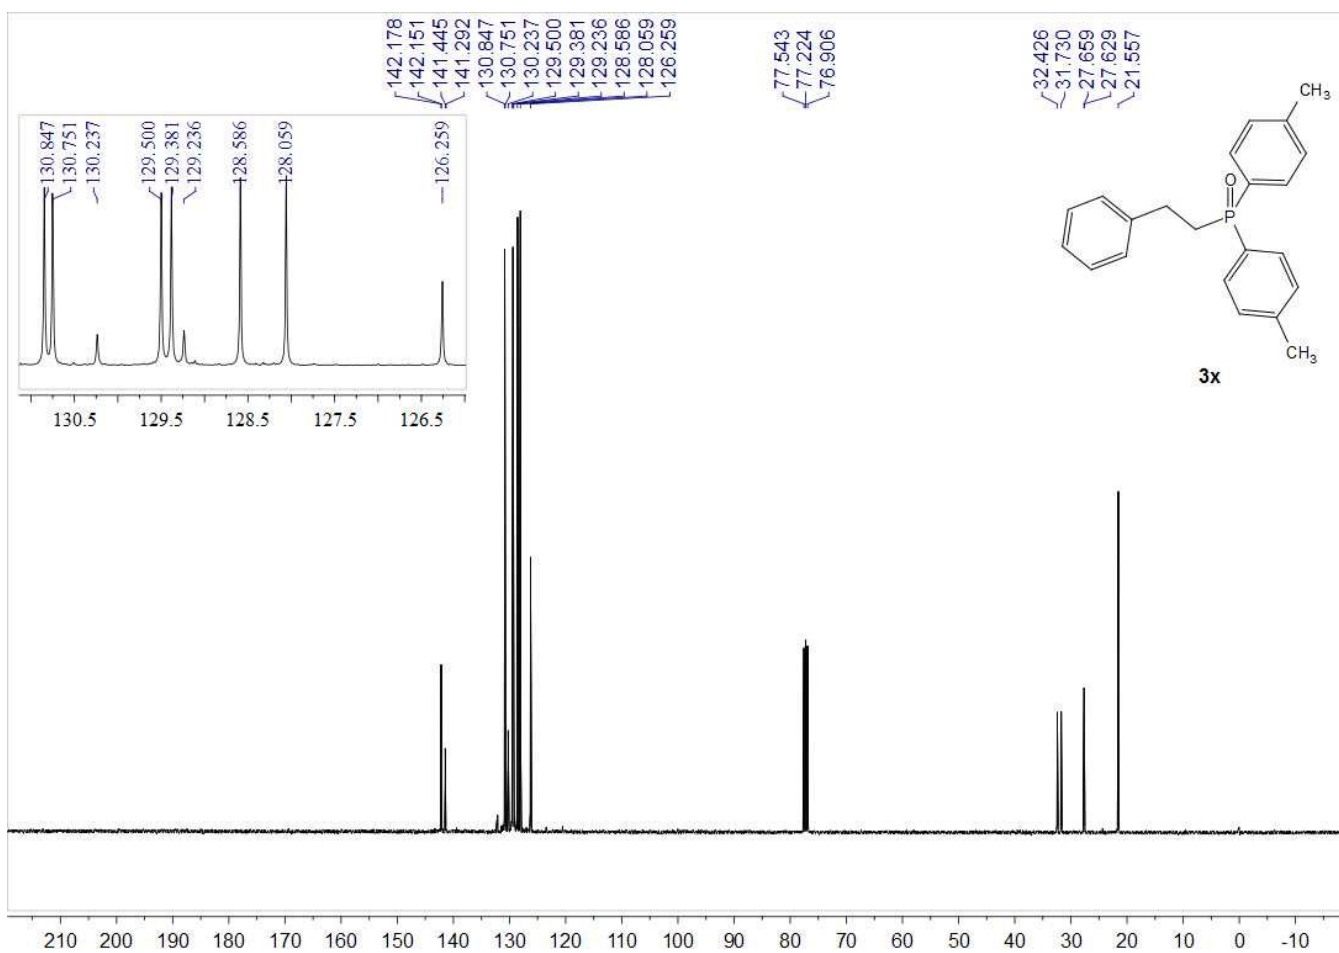

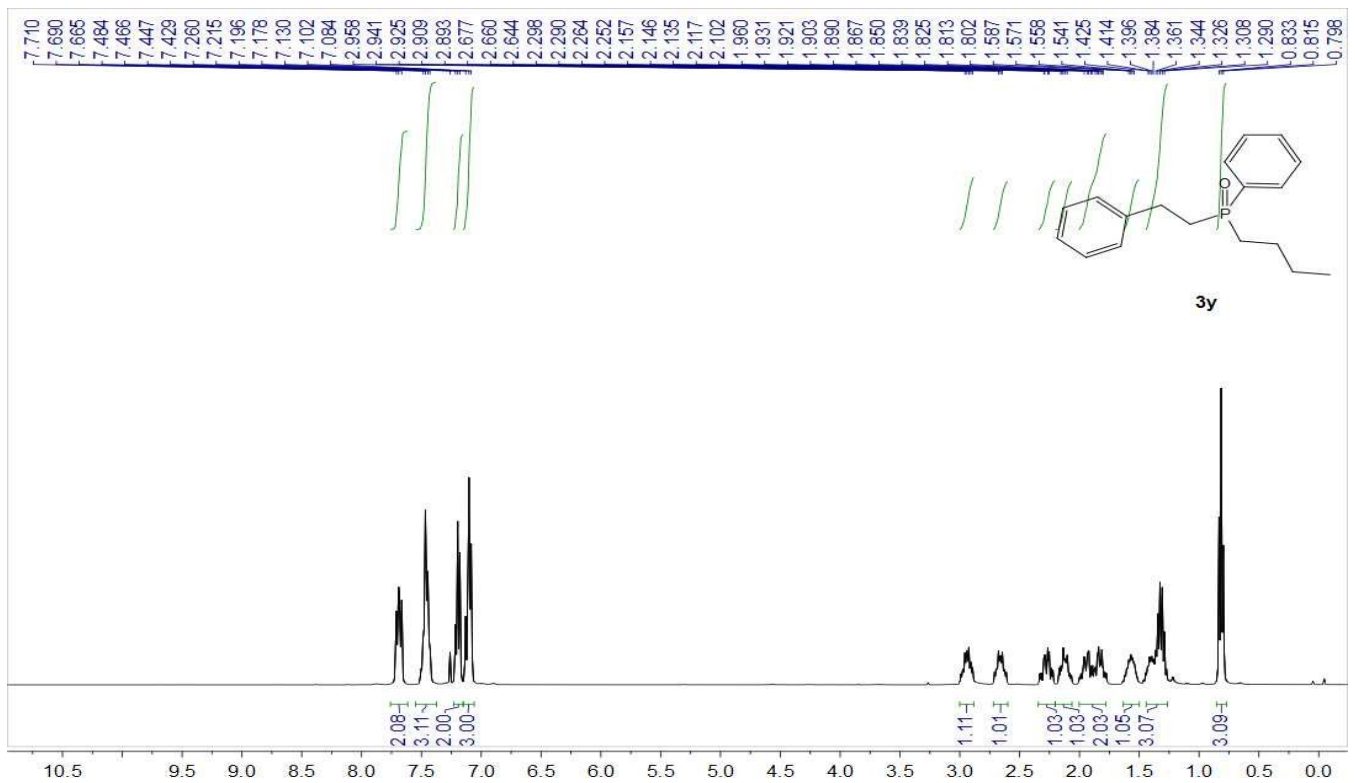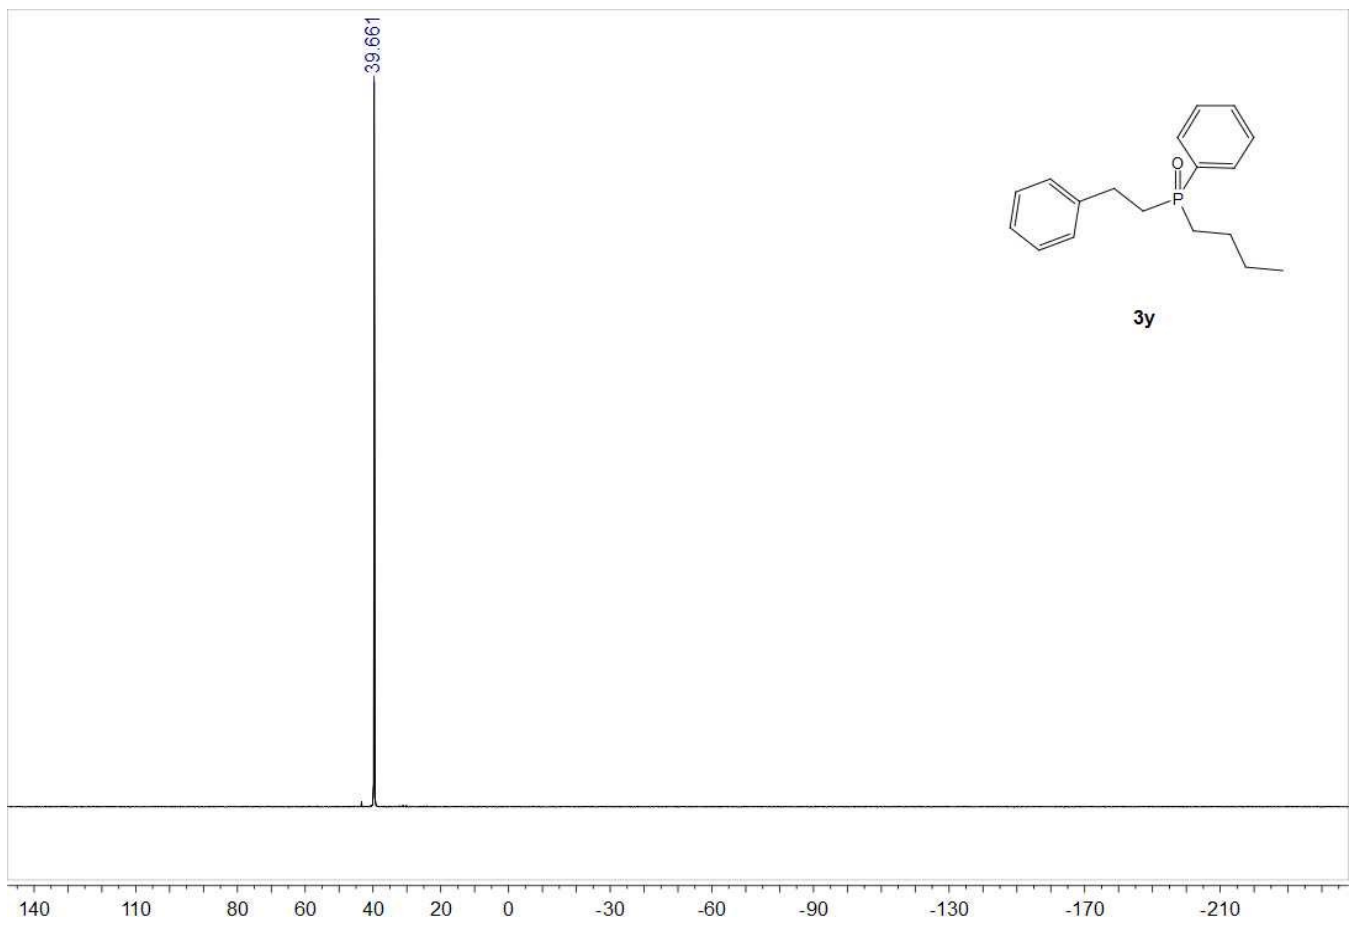

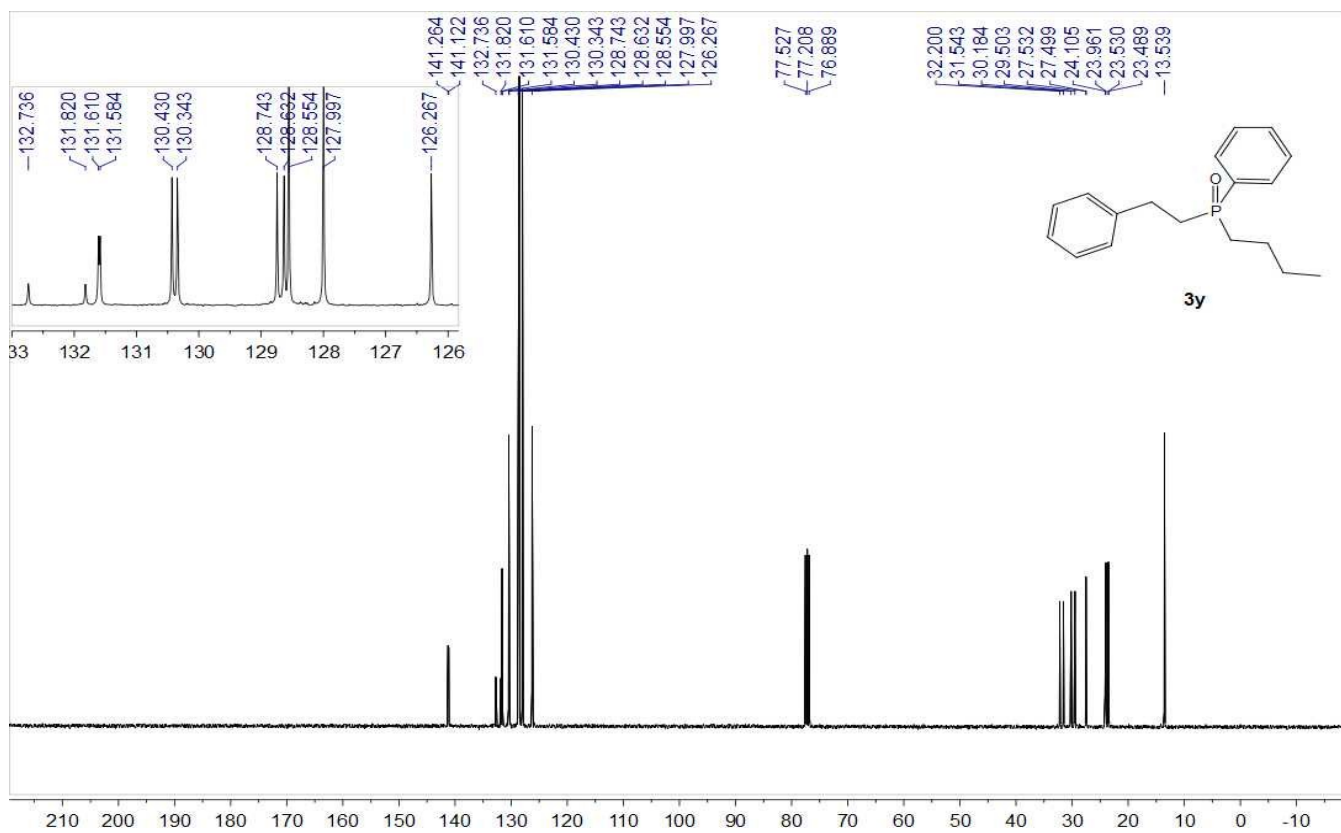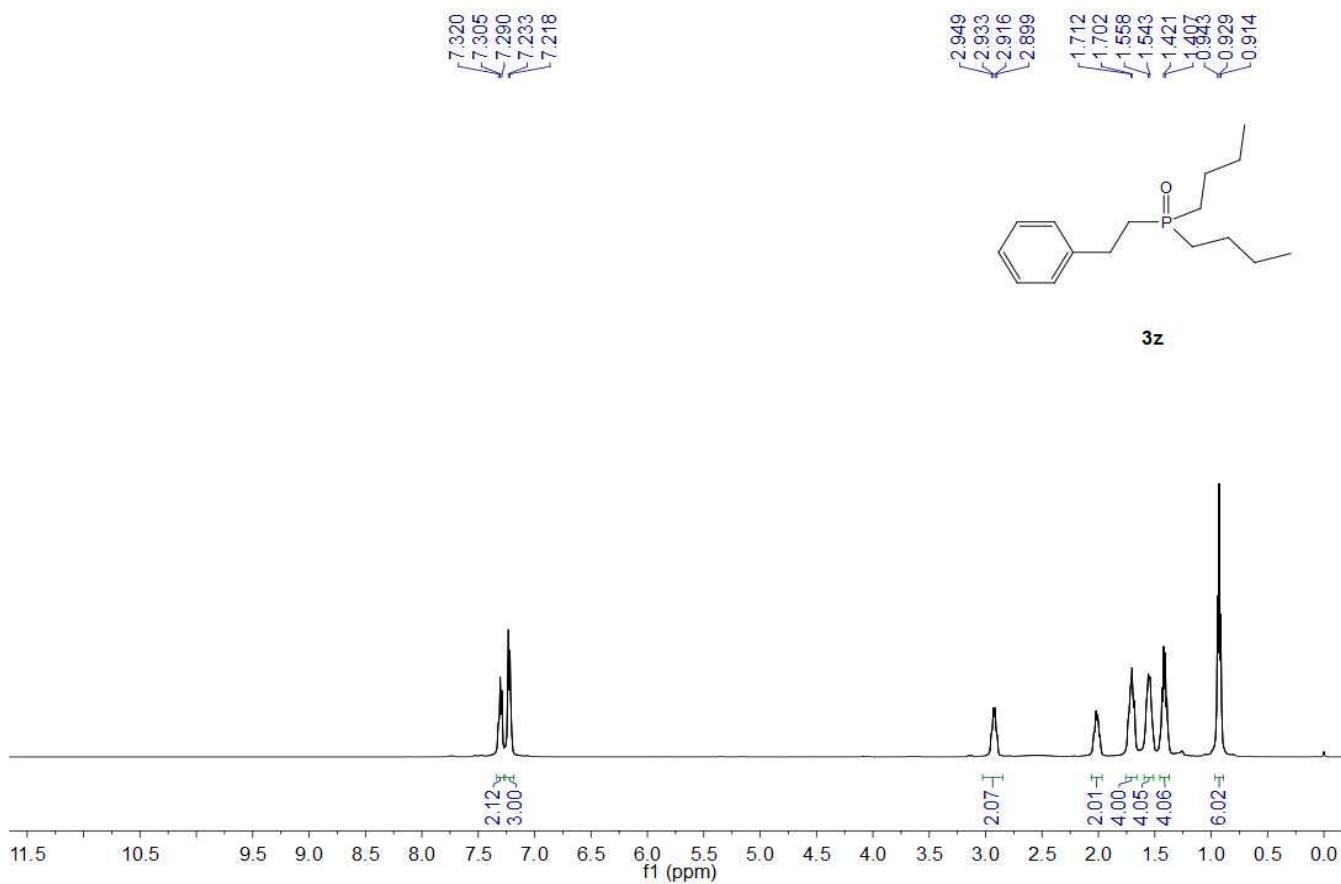

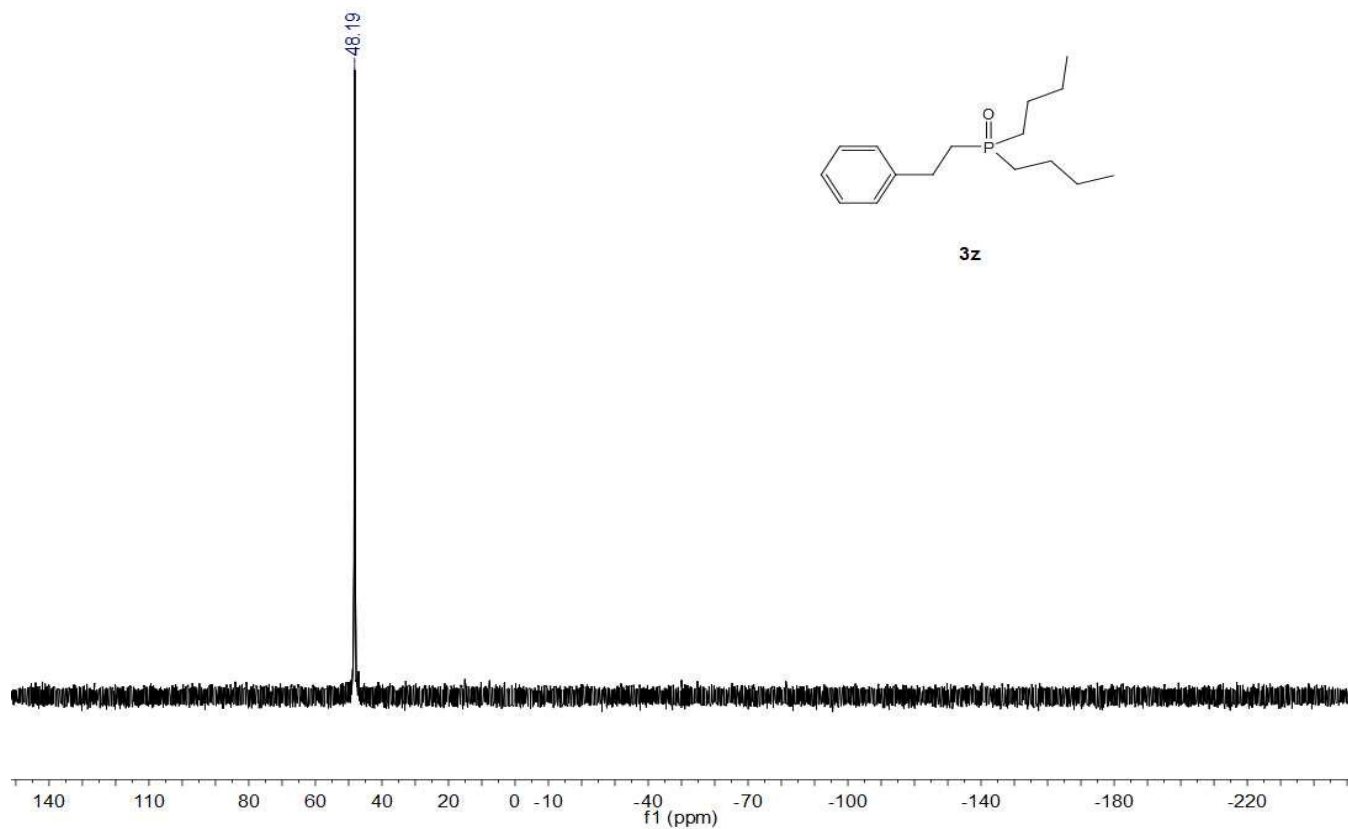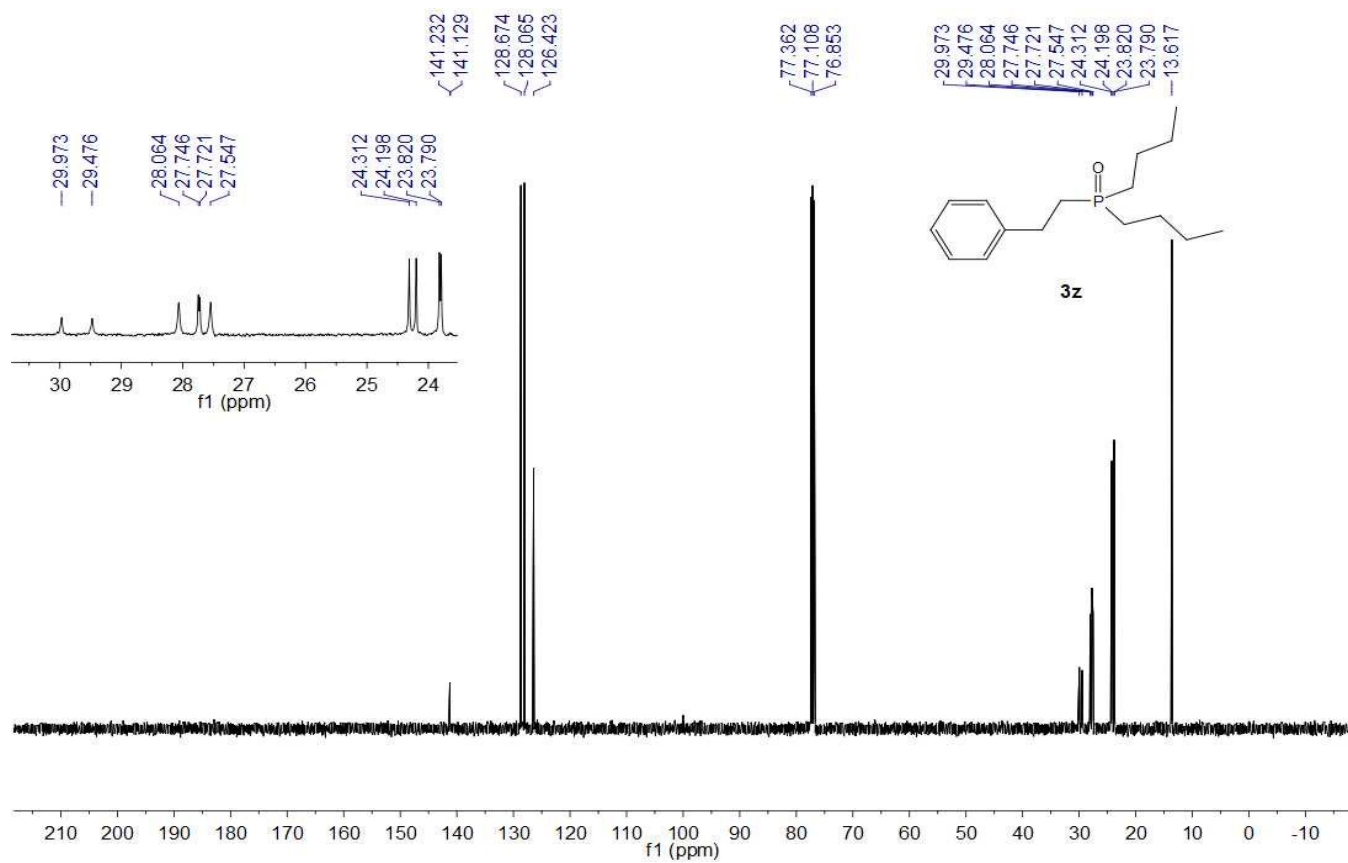

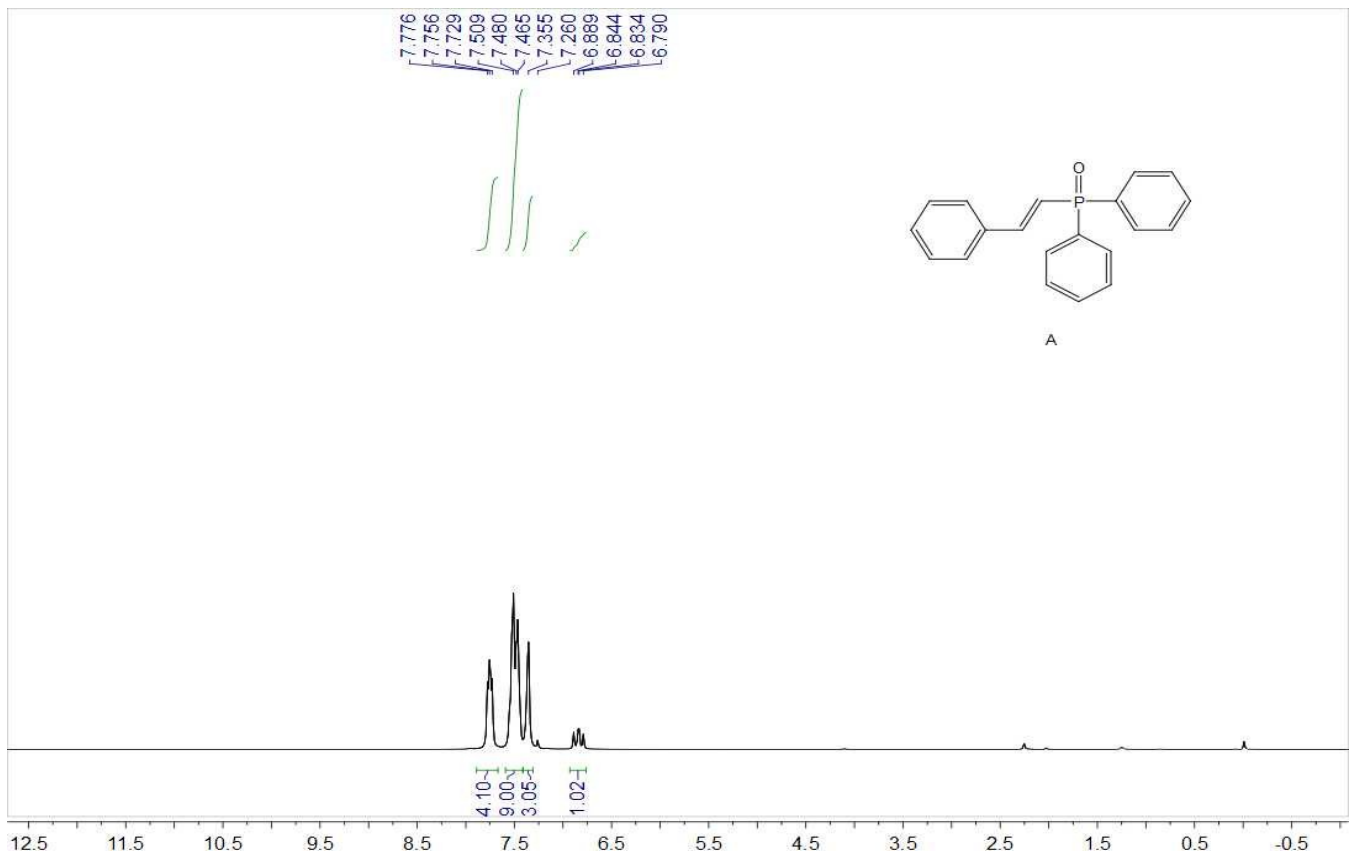

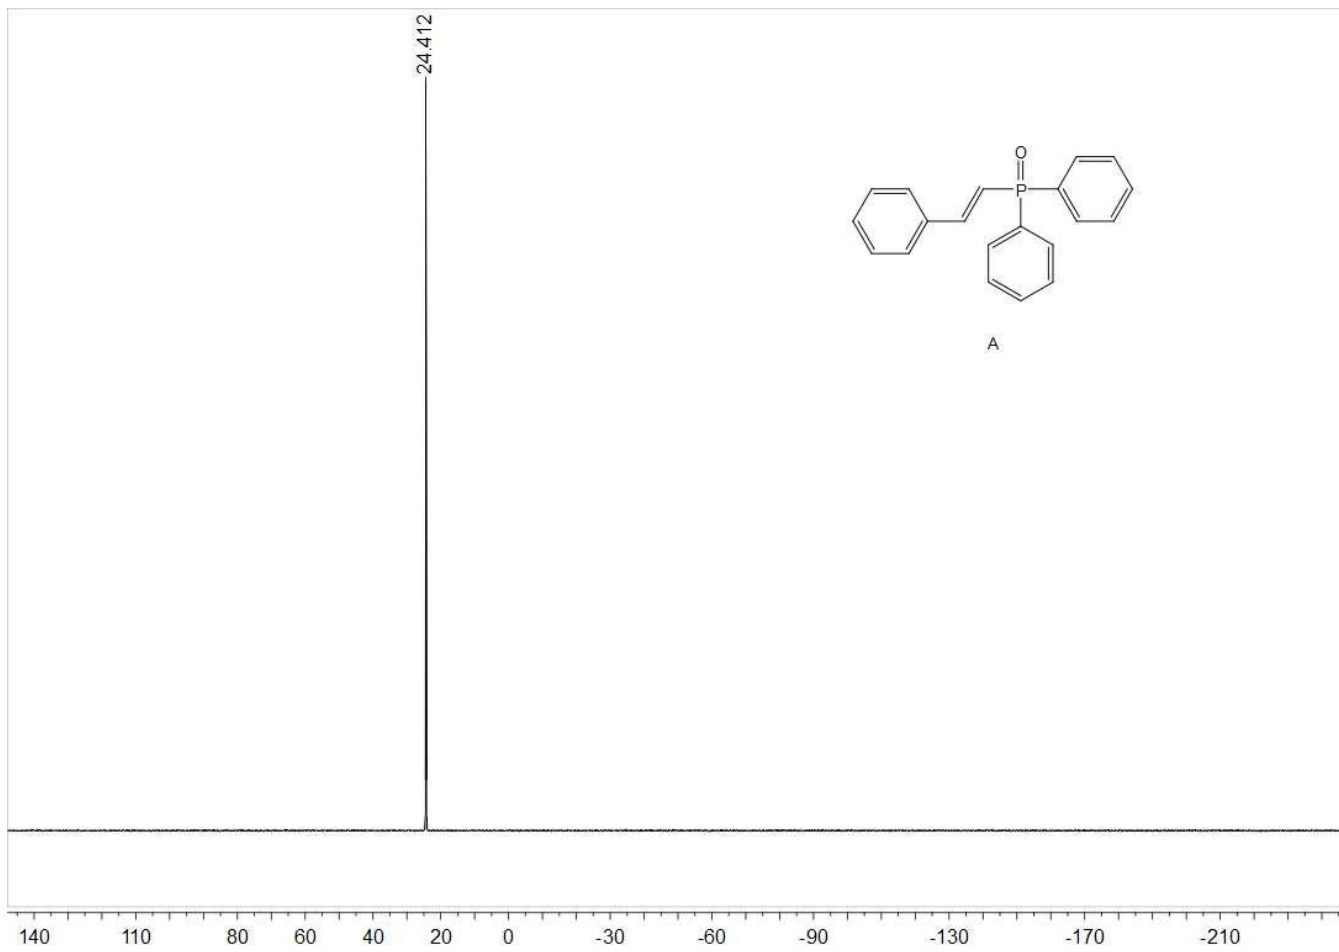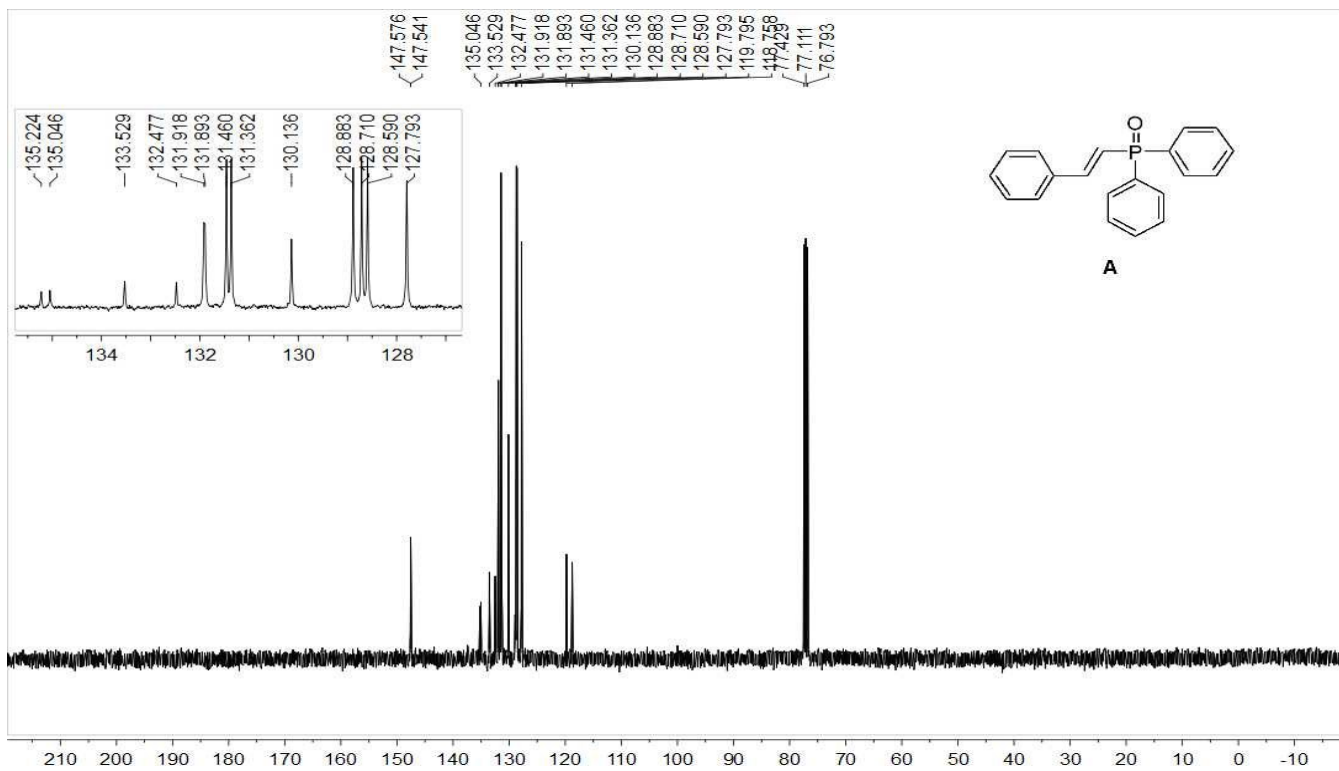

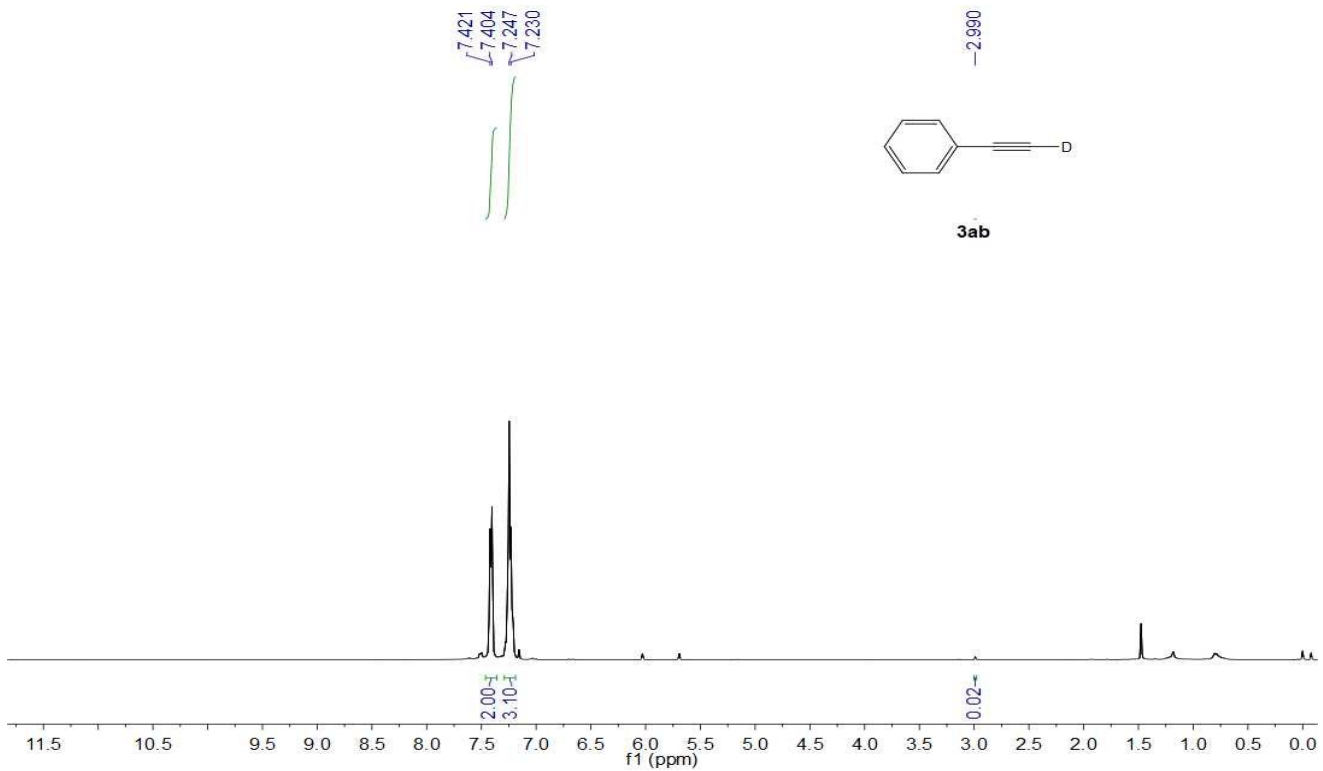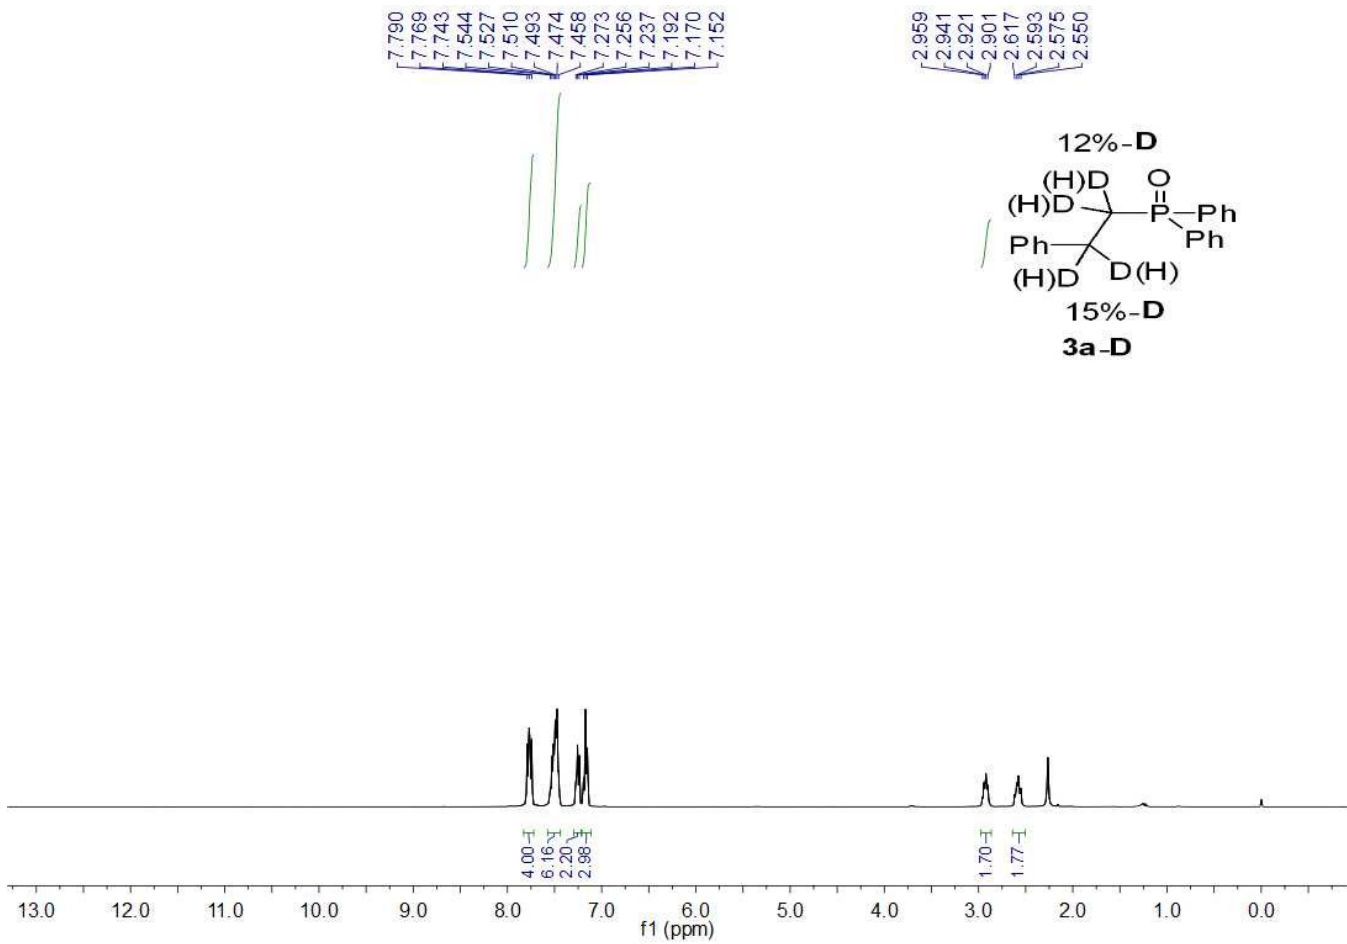



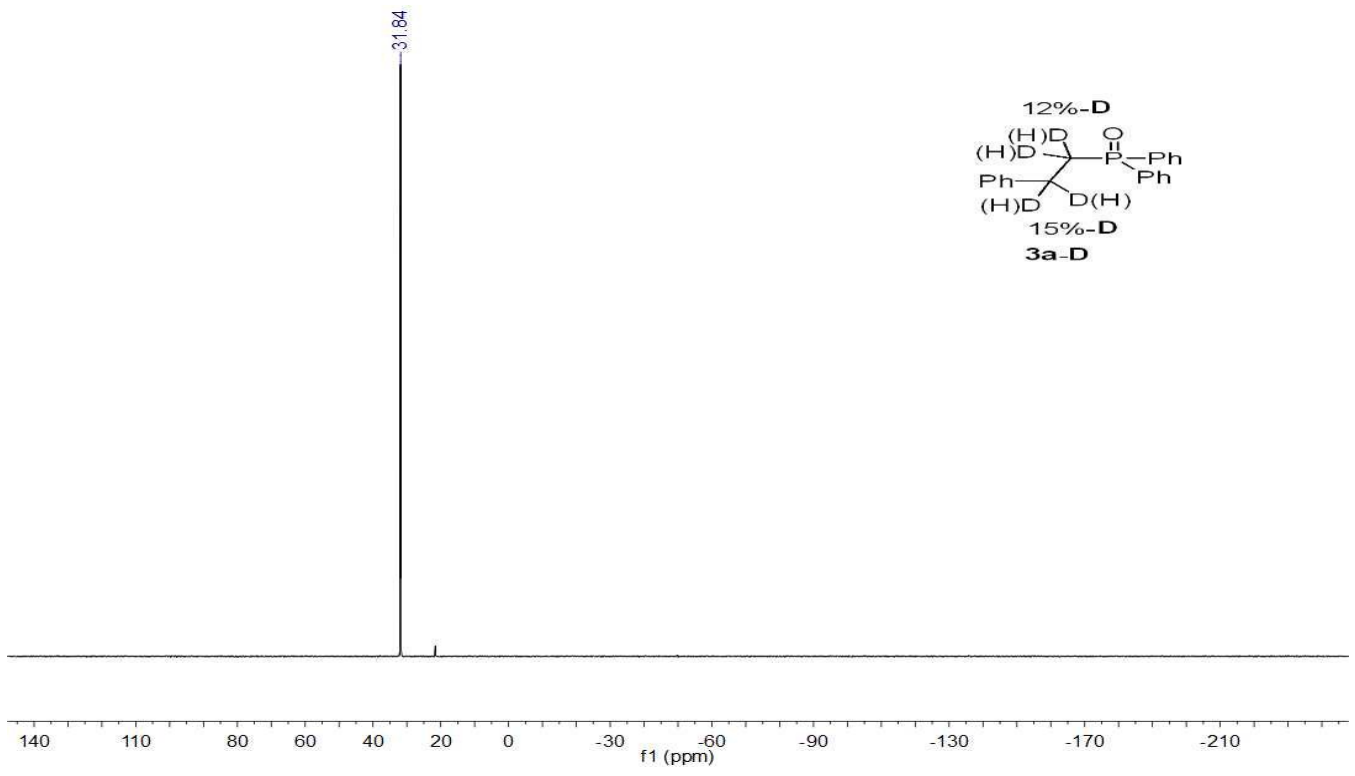

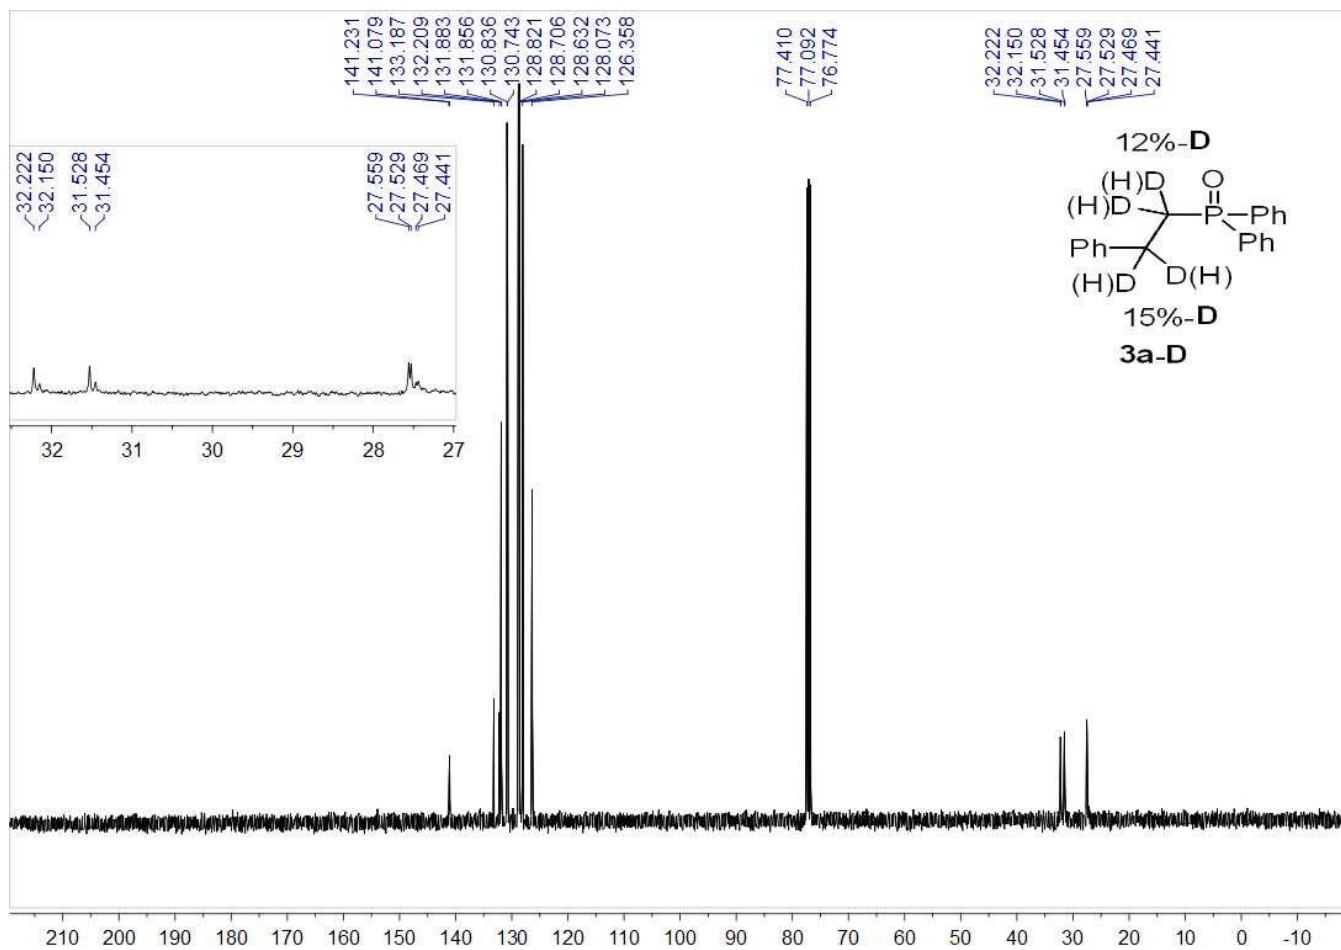

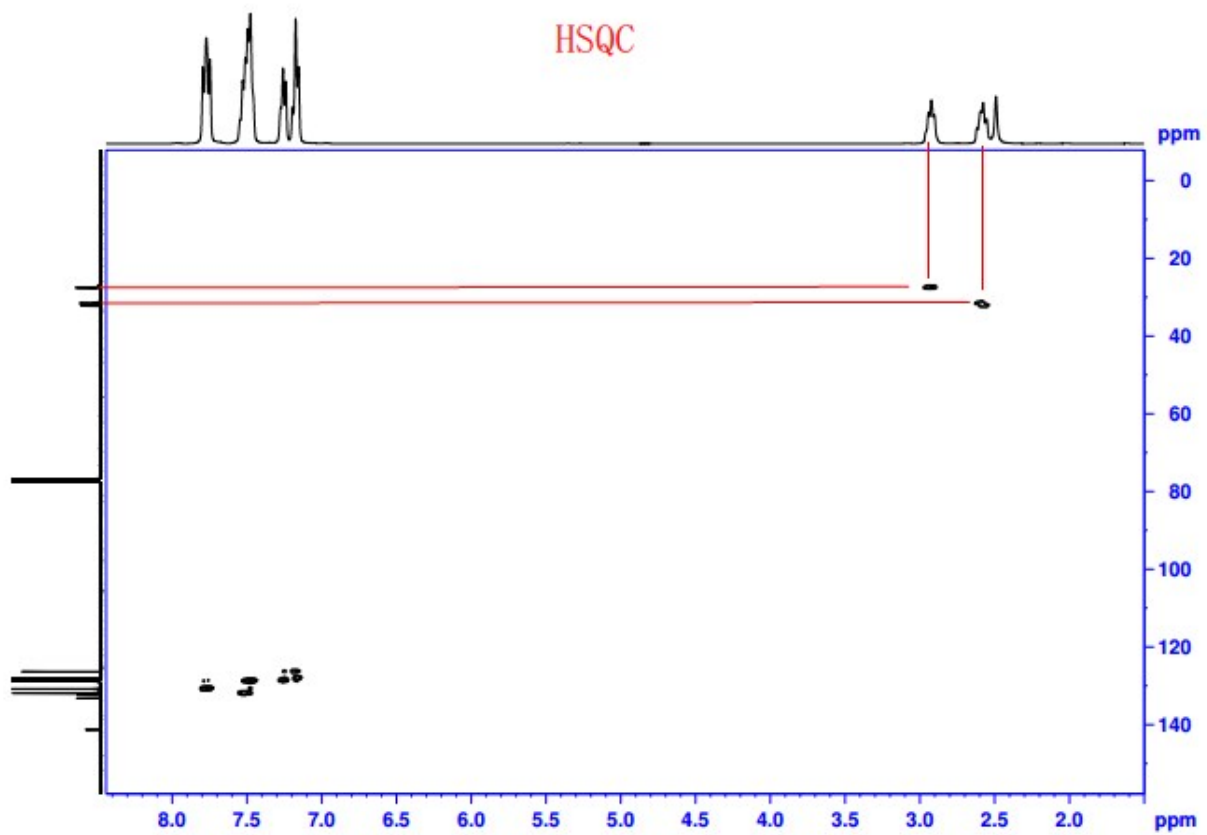

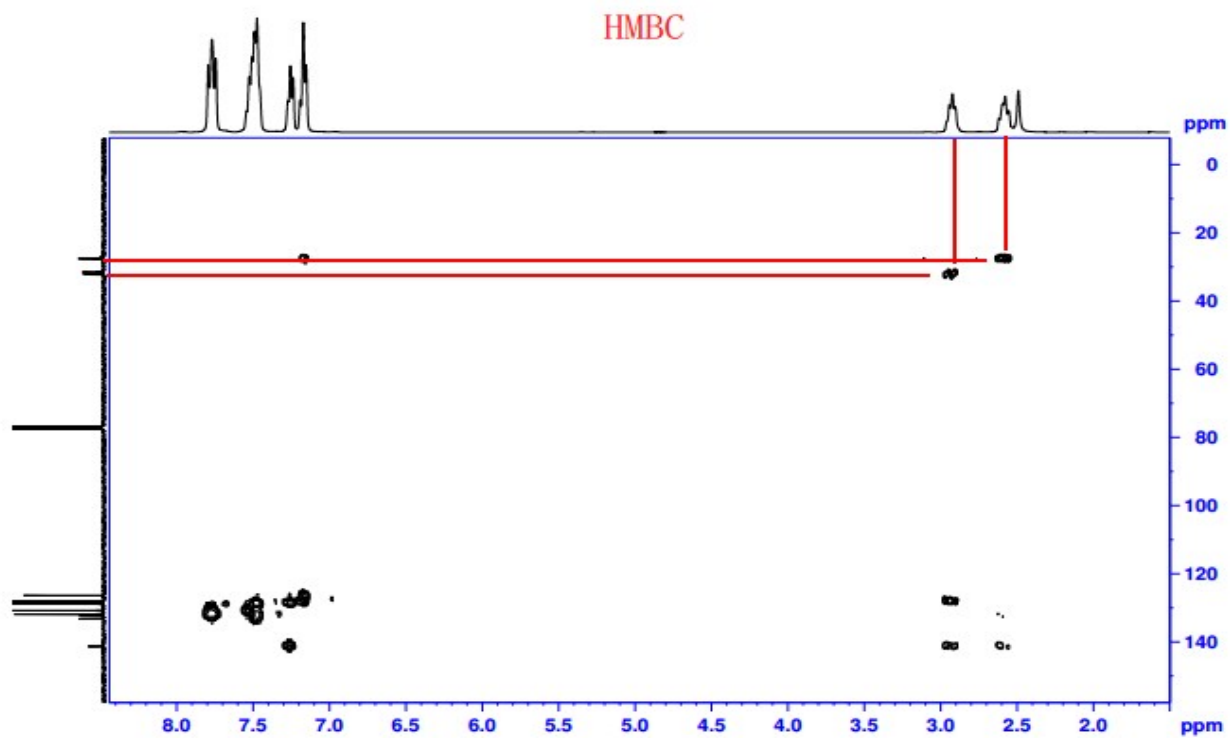

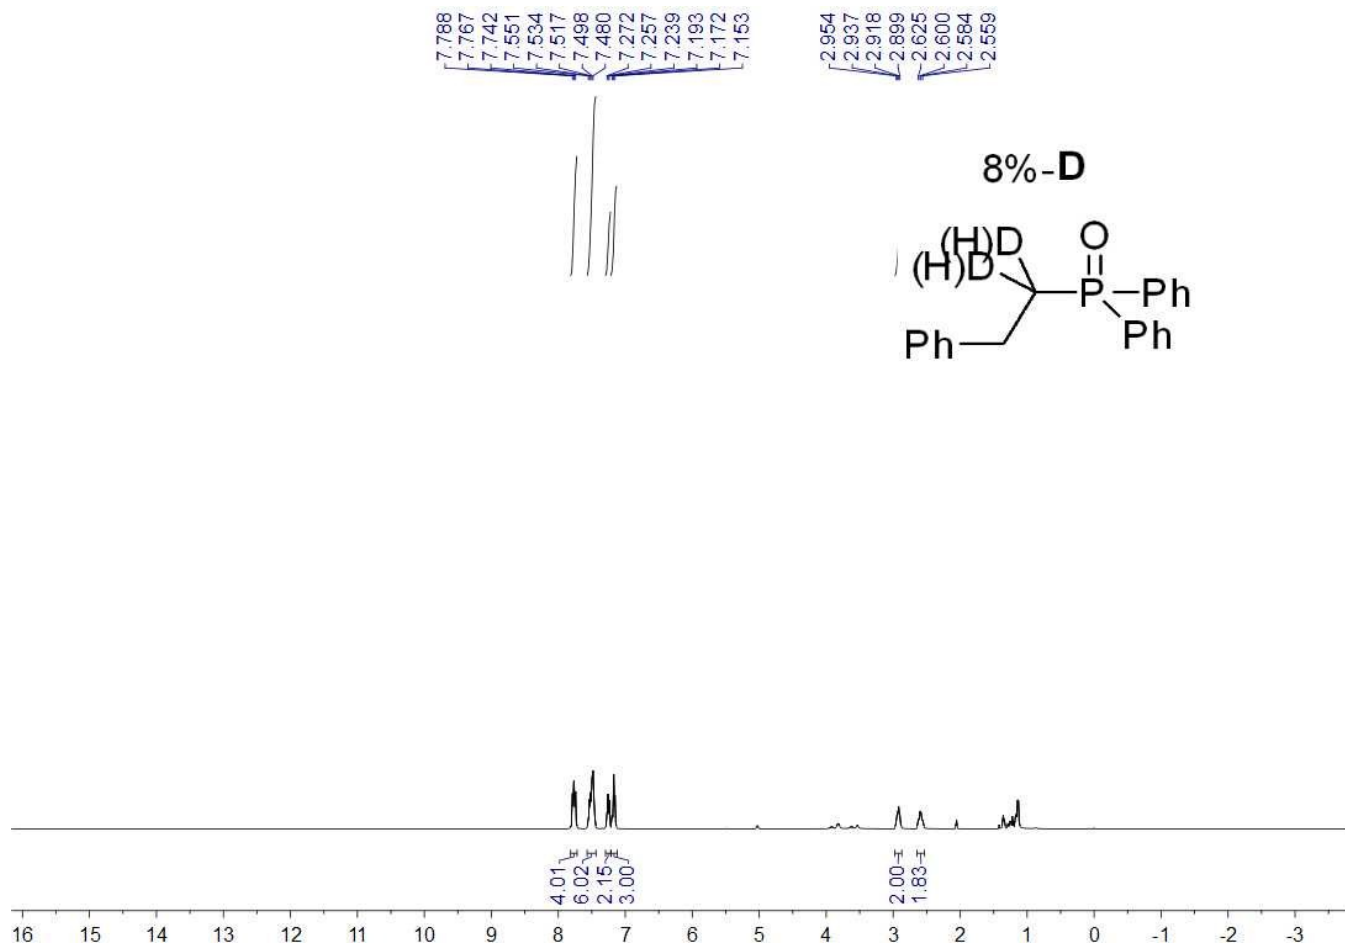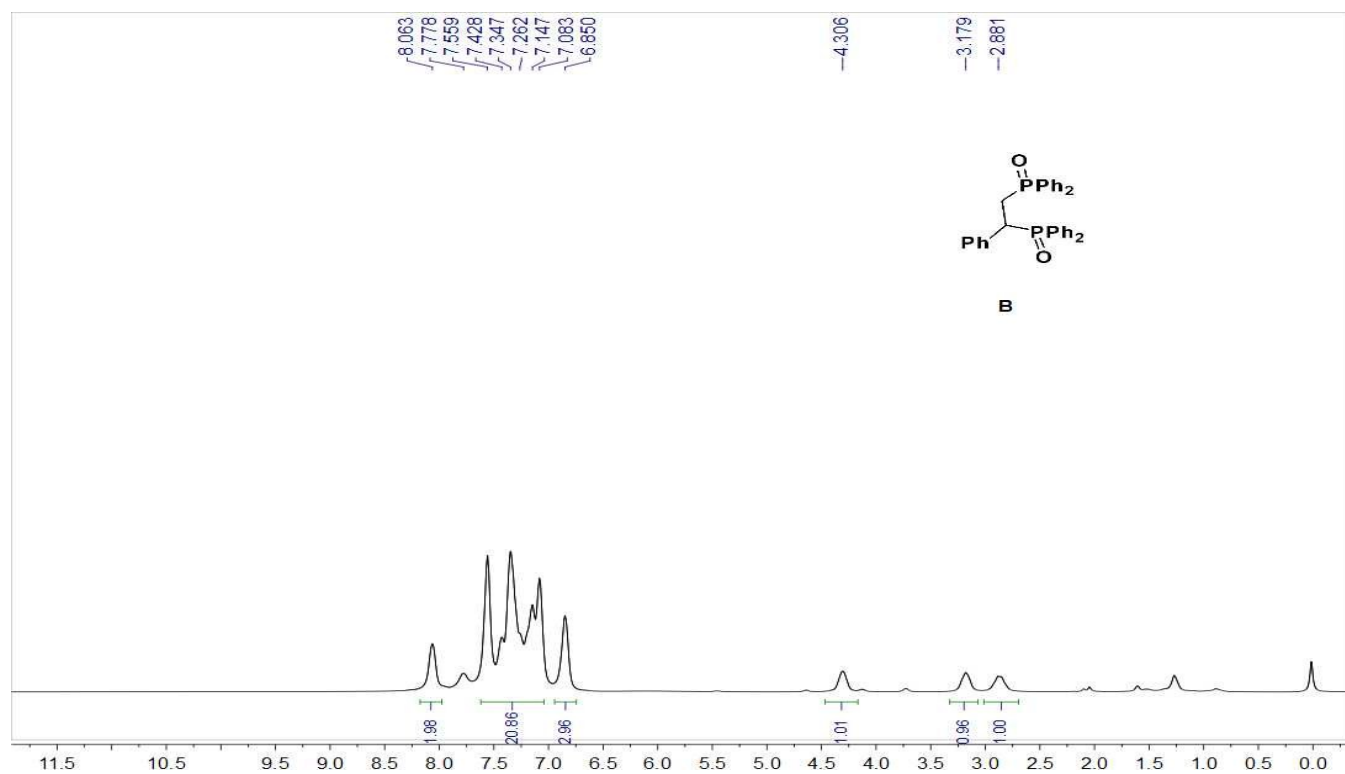

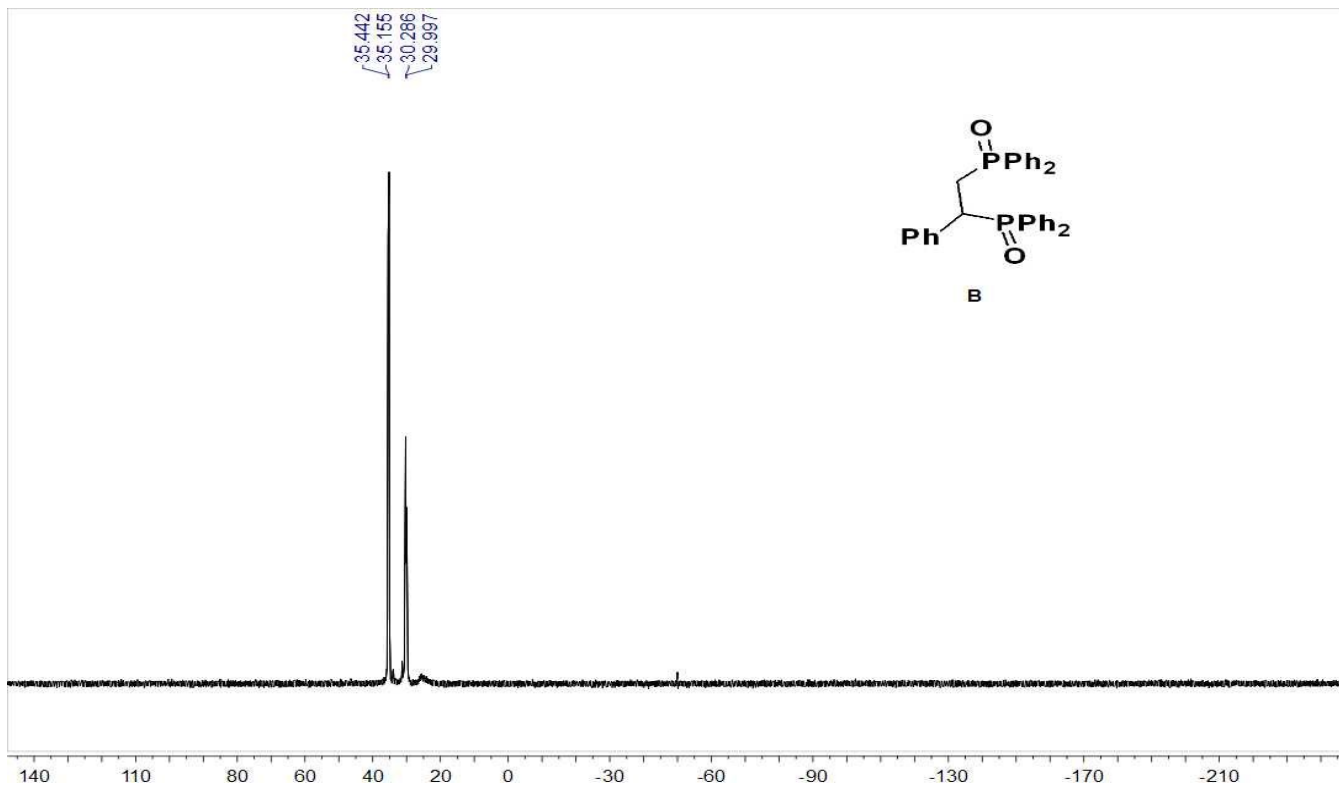

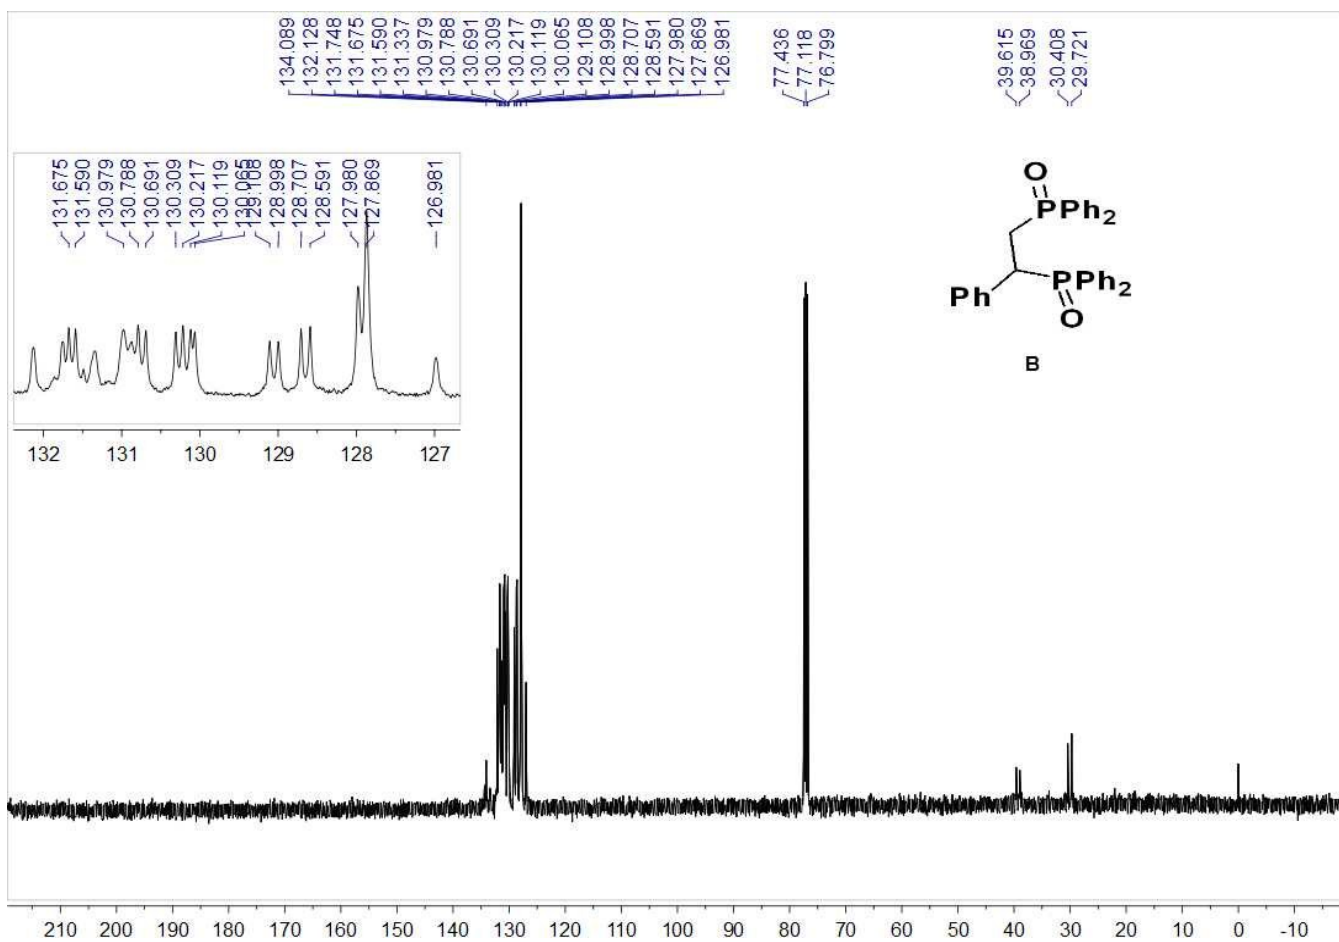

Supplement: c7ob01104k1.pdf [file c7ob01104k1.pdf]
